# Supplementary material for: A swarm intelligence modeling approach reveals noble gas cluster configurations confined within carbon nanotubes
Source: Royal Society of Chemistry journal article supplement (doi:10.1039/d0cp03014g), 2020-01-01
Supplement: d0cp03014g1.pdf [file d0cp03014g1.pdf]

## Supporting Information

# **A Swarm Intelligence Modeling Approach Reveals Noble Gas Cluster Configurations Confined within Carbon Nanotubes**

Cheriyacheruvakkara Owais, Chris John, and Rotti Srinivasamurthy Swathi\*

*School of Chemistry, Indian Institute of Science Education and Research  
Thiruvananthapuram (IISER TVM), Vithura, Thiruvananthapuram 695551, India*

E-mail: [swathi@iisertvm.ac.in](mailto:swathi@iisertvm.ac.in)

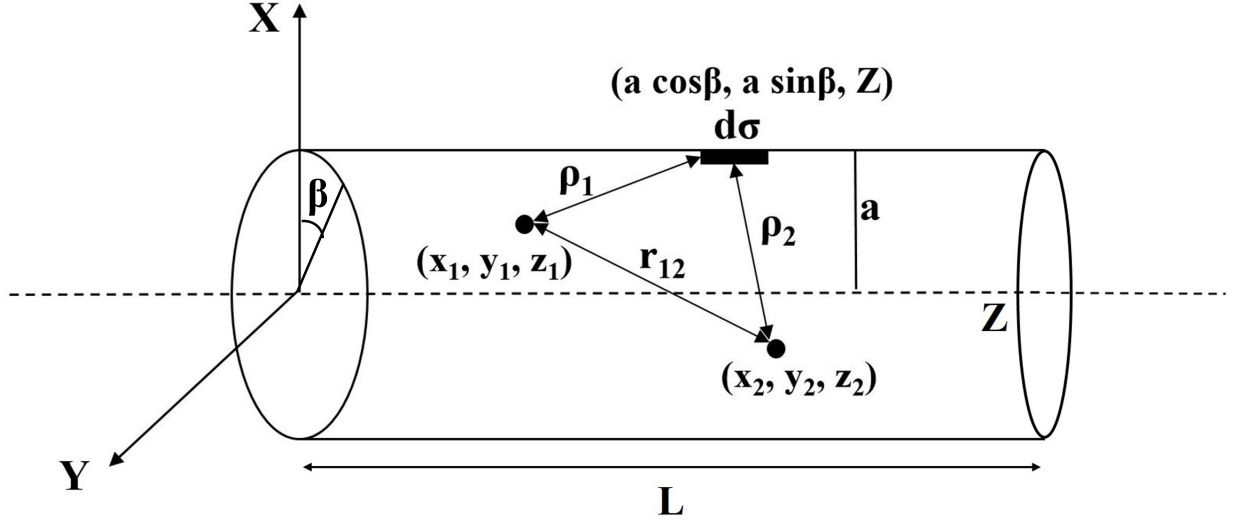

Figure S1: A schematic illustrating the key parameters in the continuum approximation for the interaction between a CNT of finite length and two noble gas atoms.

Table S1: Numerical values of various parameters employed in the calculations.

| Parameters                                          | Numerical values                |
|-----------------------------------------------------|---------------------------------|
| Atomic surface density of CNTs <sup>1</sup>         | 0.3812 atoms/Å <sup>2</sup>     |
| He-He attractive constant, $A_{He-He}$ <sup>2</sup> | 0.6377 eV × Å <sup>6</sup>      |
| He-He repulsive constant, $B_{He-He}$ <sup>2</sup>  | 215.8916 eV × Å <sup>12</sup>   |
| He-C attractive constant, $A_{He-C}$ <sup>1,2</sup> | 3.5045 eV × Å <sup>6</sup>      |
| He-C repulsive constant, $B_{He-C}$ <sup>1,2</sup>  | 2774.8849 eV × Å <sup>12</sup>  |
| Ne-Ne attractive constant, $A_{Ne-Ne}$ <sup>2</sup> | 5.2637 eV × Å <sup>6</sup>      |
| Ne-Ne repulsive constant, $B_{Ne-Ne}$ <sup>2</sup>  | 2395.7249 eV × Å <sup>12</sup>  |
| Ne-C attractive constant, $A_{Ne-C}$ <sup>1,2</sup> | 9.8930 eV × Å <sup>6</sup>      |
| Ne-C repulsive constant, $B_{Ne-C}$ <sup>1,2</sup>  | 8934.1344 eV × Å <sup>12</sup>  |
| Ar-Ar attractive constant, $A_{Ar-Ar}$ <sup>2</sup> | 64.2638 eV × Å <sup>6</sup>     |
| Ar-Ar repulsive constant, $B_{Ar-Ar}$ <sup>2</sup>  | 99275.1004 eV × Å <sup>12</sup> |
| Ar-C attractive constant, $A_{Ar-C}$ <sup>1,2</sup> | 33.0456 eV × Å <sup>6</sup>     |
| Ar-C repulsive constant, $B_{Ar-C}$ <sup>1,2</sup>  | 53263.6867 eV × Å <sup>12</sup> |

## Details regarding the implementation of PSO

The candidate solution of the PSO improves over iterations using the velocity and position updation rules as given below:

$$V_i^{(t+1)} = V_i^{(t)} + c_1 r_1 (pbest_i^{(t)} - X_i^{(t)}) + c_2 r_2 (gbest^{(t)} - X_i^{(t)}) \quad (1)$$

$$X_i^{(t+1)} = X_i^{(t)} + V_i^{(t+1)}, \quad (2)$$

where  $V_i^{(t+1)}$  and  $V_i^{(t)}$  are the velocities of the  $i^{th}$  particle at the current iteration number ( $t + 1$ ) and previous iteration number ( $t$ ), respectively, whereas  $X_i^{(t+1)}$  and  $X_i^{(t)}$  are the positions of the  $i^{th}$  particle at the current iteration number and previous iteration number, respectively,  $r_1$  and  $r_2$  are random numbers generated from a uniform distribution in  $[0, 1]$  and  $c_1$  and  $c_2$  are the cognitive and the social acceleration constants which usually take the value 2.05.<sup>3,4</sup> The *pbest* represents the lowest energy located by the particle over the iterations whereas *gbest* is the lowest energy among the particles over the iterations. At the end of the iteration, the *gbest* converges to the global optimum structure and the corresponding energy represents the lowest energy in the landscape.

**Table S2: Total binding energies, chiral indices ( $n, m$ ) and optimal CNT radii for the encapsulation of helium clusters inside CNTs.**

| $n$ | $L = 10 \text{ \AA}$ |                         |          | $L = 20 \text{ \AA}$ |                         |          | $L = 30 \text{ \AA}$ |                         |          | $L = 50 \text{ \AA}$ |                         |          |
|-----|----------------------|-------------------------|----------|----------------------|-------------------------|----------|----------------------|-------------------------|----------|----------------------|-------------------------|----------|
|     | $BE_{total}$<br>(eV) | $a$<br>( $\text{\AA}$ ) | $(n, m)$ | $BE_{total}$<br>(eV) | $a$<br>( $\text{\AA}$ ) | $(n, m)$ | $BE_{total}$<br>(eV) | $a$<br>( $\text{\AA}$ ) | $(n, m)$ | $BE_{total}$<br>(eV) | $a$<br>( $\text{\AA}$ ) | $(n, m)$ |
| 10  | 0.2562               | 4.50                    | (11,1)   | 0.3515               | 3.45                    | (7,3)    | 0.4888               | 3.30                    | (8,1)    | 0.5024               | 3.30                    | (8,1)    |
| 20  | 0.4118               | 5.61                    | (12,4)   | 0.5743               | 4.45                    | (8,5)    | 0.6318               | 4.12                    | (10,1)   | 0.9449               | 3.30                    | (8,1)    |
| 30  | 0.5299               | 6.50                    | (16,1)   | 0.7717               | 4.80                    | (9,5)    | 0.8887               | 4.42                    | (8,5)    | 0.9923               | 4.04                    | (6,5)    |
| 40  | 0.6438               | 7.10                    | (17,2)   | 0.9089               | 5.60                    | (12,4)   | 1.0987               | 4.75                    | (11,2)   | 1.2407               | 4.30                    | (10,2)   |
| 50  | 0.7408               | 7.90                    | (19,2)   | 1.0782               | 5.75                    | (13,3)   | 1.2775               | 5.14                    | (12,2)   | 1.5092               | 4.40                    | (10,2)   |

**Table S3: Total binding energies, chiral indices  $(n, m)$  and optimal CNT radii for the encapsulation of neon clusters inside CNTs.**

| $n$ | $L = 10 \text{ \AA}$ |                         |          | $L = 20 \text{ \AA}$ |                         |          | $L = 30 \text{ \AA}$ |                         |          | $L = 50 \text{ \AA}$ |                         |          |
|-----|----------------------|-------------------------|----------|----------------------|-------------------------|----------|----------------------|-------------------------|----------|----------------------|-------------------------|----------|
|     | $BE_{total}$<br>(eV) | $a$<br>( $\text{\AA}$ ) | $(n, m)$ | $BE_{total}$<br>(eV) | $a$<br>( $\text{\AA}$ ) | $(n, m)$ | $BE_{total}$<br>(eV) | $a$<br>( $\text{\AA}$ ) | $(n, m)$ | $BE_{total}$<br>(eV) | $a$<br>( $\text{\AA}$ ) | $(n, m)$ |
| 10  | 0.6681               | 4.70                    | (11,2)   | 0.8331               | 4.30                    | (10,3)   | 1.2446               | 3.40                    | (6,4)    | 1.3138               | 3.40                    | (6,4)    |
| 20  | 1.1150               | 5.90                    | (14,2)   | 1.5172               | 4.80                    | (9,5)    | 1.6378               | 4.53                    | (11,1)   | 2.3083               | 3.40                    | (6,4)    |
| 30  | 1.4852               | 7.02                    | (14,6)   | 1.9681               | 5.70                    | (14,1)   | 2.3568               | 4.65                    | (10,3)   | 2.5536               | 4.30                    | (10,2)   |
| 40  | 1.8430               | 7.60                    | (19,1)   | 2.5336               | 5.90                    | (14,2)   | 2.9025               | 5.17                    | (12,2)   | 3.2793               | 4.59                    | (11,1)   |
| 50  | 2.1548               | 8.50                    | (21,1)   | 3.0107               | 6.23                    | (12,6)   | 3.3267               | 5.70                    | (14,1)   | 4.0168               | 4.70                    | (11,2)   |

**Table S4: Total binding energies, chiral indices  $(n, m)$  and optimal CNT radii for the encapsulation of argon clusters inside CNTs.**

| $n$ | $L = 10 \text{ \AA}$ |                         |          | $L = 20 \text{ \AA}$ |                         |          | $L = 30 \text{ \AA}$ |                         |          | $L = 50 \text{ \AA}$ |                         |          |
|-----|----------------------|-------------------------|----------|----------------------|-------------------------|----------|----------------------|-------------------------|----------|----------------------|-------------------------|----------|
|     | $BE_{total}$<br>(eV) | $a$<br>( $\text{\AA}$ ) | $(n, m)$ | $BE_{total}$<br>(eV) | $a$<br>( $\text{\AA}$ ) | $(n, m)$ | $BE_{total}$<br>(eV) | $a$<br>( $\text{\AA}$ ) | $(n, m)$ | $BE_{total}$<br>(eV) | $a$<br>( $\text{\AA}$ ) | $(n, m)$ |
| 10  | 1.4697               | 5.60                    | (13,2)   | 1.8170               | 5.20                    | (10,5)   | 2.5281               | 3.70                    | (9,1)    | 3.0170               | 3.70                    | (9,1)    |
| 20  | 2.5647               | 7.03                    | (15,5)   | 3.3681               | 5.78                    | (13,3)   | 3.6361               | 5.50                    | (13,2)   | 3.8818               | 4.80                    | (11,2)   |
| 30  | 3.4207               | 8.40                    | (21,2)   | 4.6132               | 6.89                    | (17,1)   | 5.2383               | 5.77                    | (13,3)   | 5.7026               | 5.30                    | (13,1)   |
| 40  | 4.2529               | 9.20                    | (23,1)   | 5.5325               | 7.93                    | (20,1)   | 6.3536               | 6.73                    | (16,2)   | 7.3664               | 5.52                    | (13,2)   |
| 50  | 5.2092               | 10.14                   | (23,5)   | 6.7674               | 8.37                    | (19,5)   | 7.9231               | 6.90                    | (17,1)   | 8.9310               | 5.76                    | (13,3)   |

He

$L=10 \text{ \AA}$

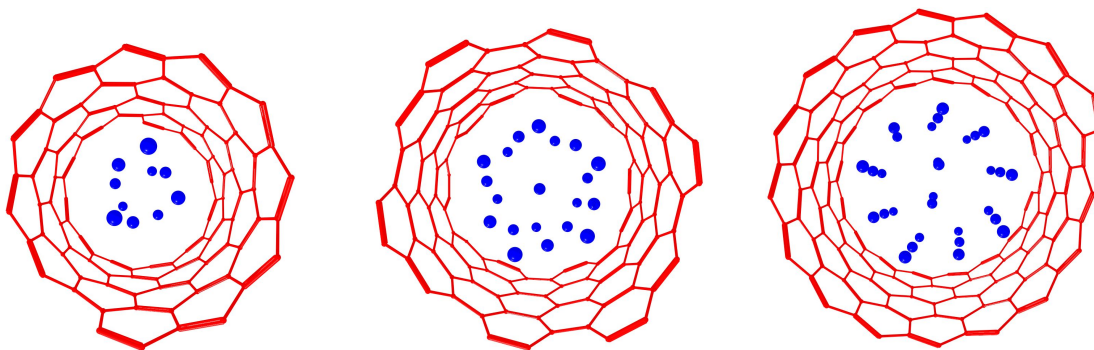

n=10  
a=4.50  $\text{\AA}$

n=20  
a=5.60  $\text{\AA}$

n=30  
a=6.50  $\text{\AA}$

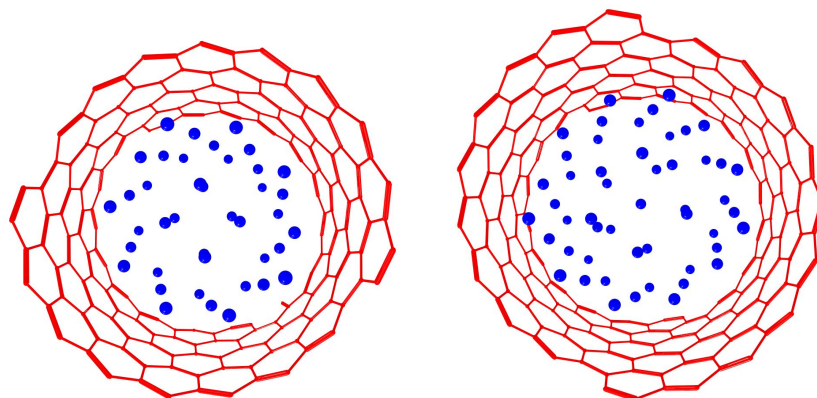

n=40  
a=7.10  $\text{\AA}$

n=50  
a=7.90  $\text{\AA}$

$L=20 \text{ \AA}$

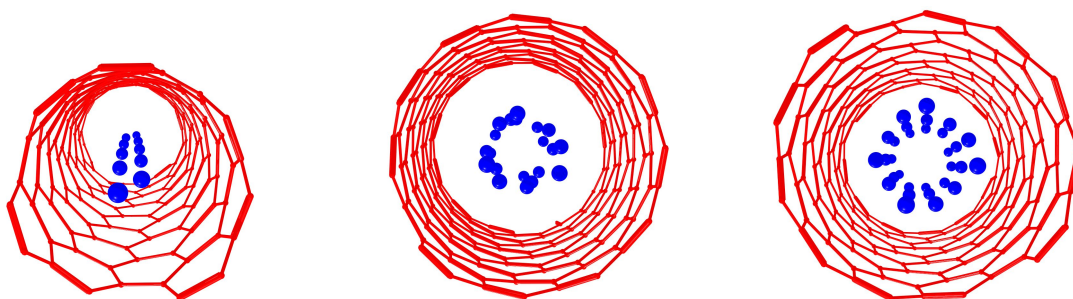

n=10  
a=3.50  $\text{\AA}$

n=20  
a=4.50  $\text{\AA}$

n=30  
a=4.80  $\text{\AA}$

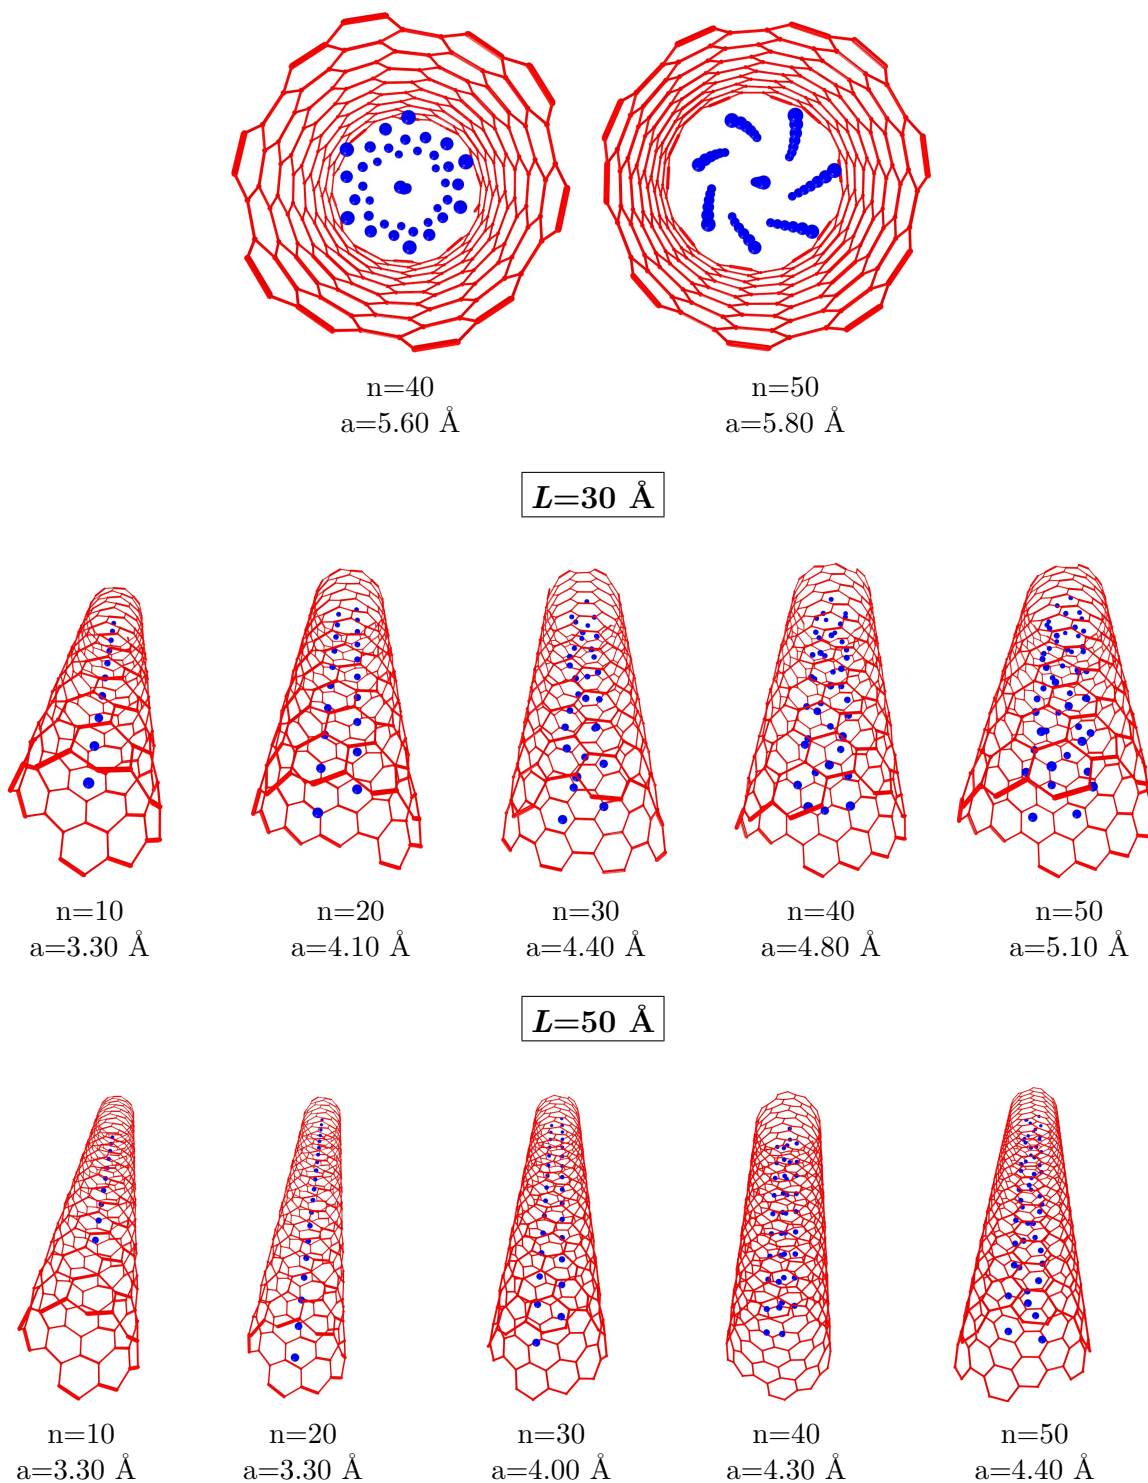

Figure S2: Optimized geometries of He clusters of size,  $n = 10, 20, 30, 40$  and  $50$  inside CNTs of length,  $L = 10 \text{ \AA}, 20 \text{ \AA}, 30 \text{ \AA}$  and  $50 \text{ \AA}$ . The optimal CNT radii for each case are also given.

Ne

$L=10 \text{ \AA}$

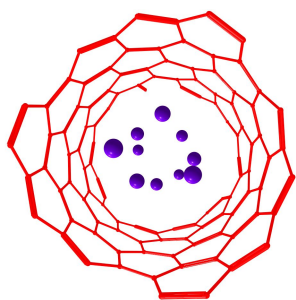

$n=10$   
 $a=4.70 \text{ \AA}$

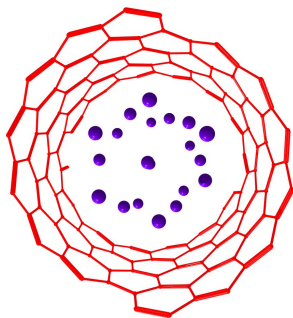

$n=20$   
 $a=5.90 \text{ \AA}$

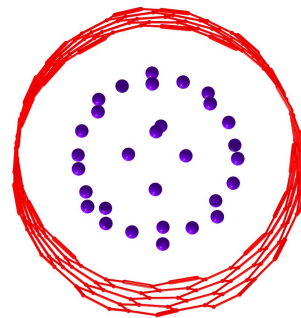

$n=30$   
 $a=7.00 \text{ \AA}$

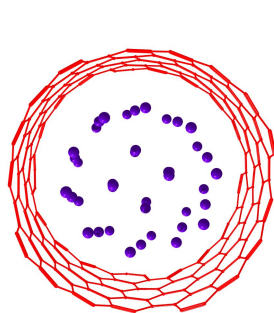

$n=40$   
 $a=7.60 \text{ \AA}$

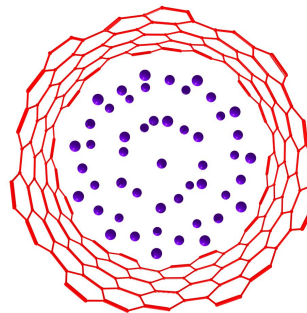

$n=50$   
 $a=8.50 \text{ \AA}$

$L=20 \text{ \AA}$

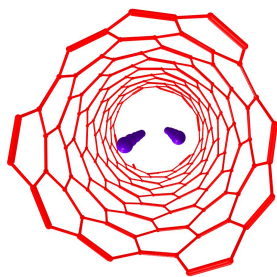

$n=10$   
 $a=4.30 \text{ \AA}$

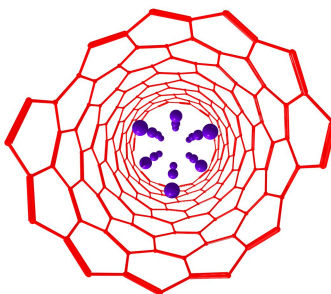

$n=20$   
 $a=4.80 \text{ \AA}$

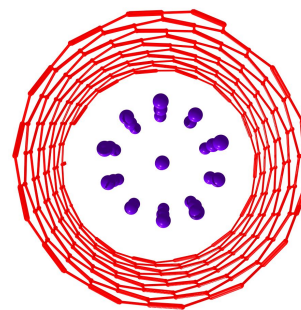

$n=30$   
 $a=5.70 \text{ \AA}$

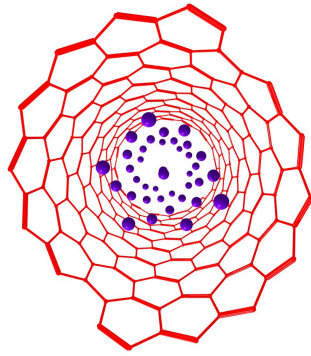

n=40  
a=5.90 Å

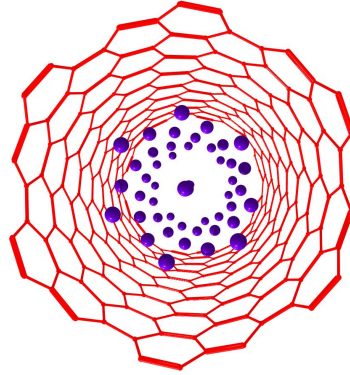

n=50  
a=6.20 Å

$L=30 \text{ \AA}$

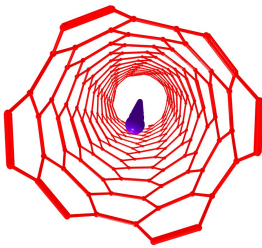

n=10  
a=3.40 Å

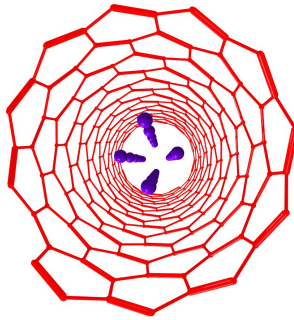

n=20  
a=4.50 Å

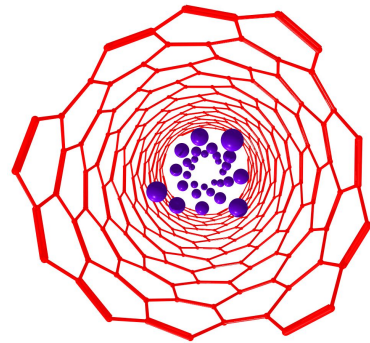

n=30  
a=4.70 Å

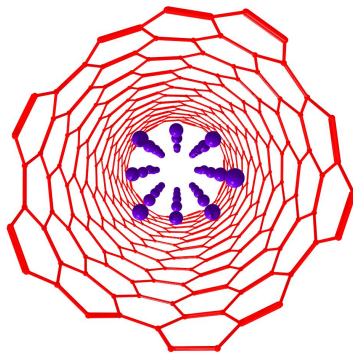

n=40  
a=5.20 Å

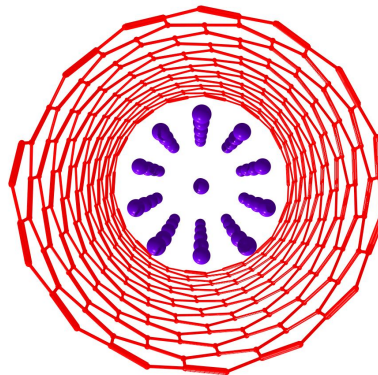

n=50  
a=5.70 Å



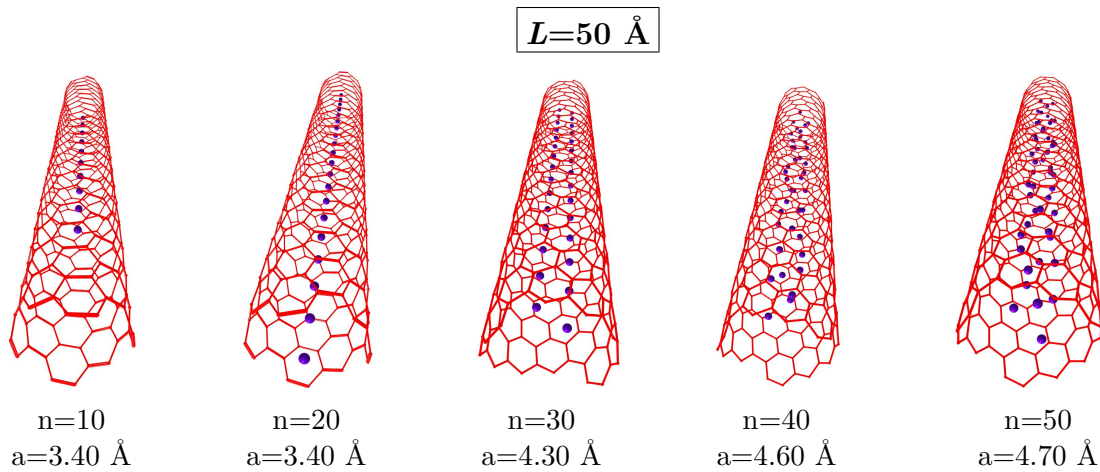

Figure S3: Optimized geometries of Ne clusters of size,  $n = 10, 20, 30, 40$  and  $50$  inside CNTs of length,  $L = 10 \text{ \AA}, 20 \text{ \AA}, 30 \text{ \AA}$  and  $50 \text{ \AA}$ . The optimal CNT radii for each case are also given.

Ar

$L=10 \text{ \AA}$

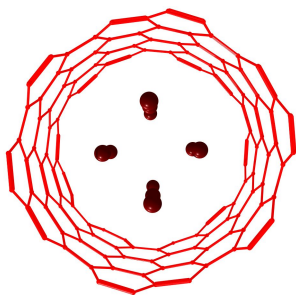

n=10  
a=5.60 Å

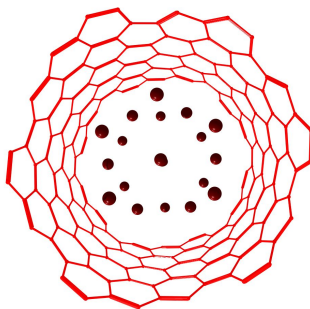

n=20  
a=7.00 Å

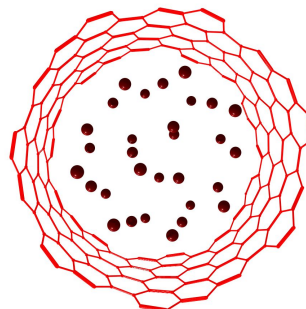

n=30  
a=8.40 Å

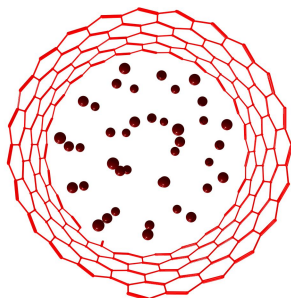

n=40  
a=9.20 Å

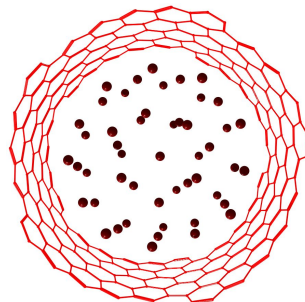

n=50  
a=10.10 Å

$L=20 \text{ \AA}$

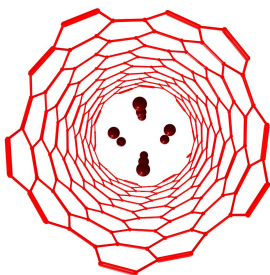

n=10  
a=5.20 Å

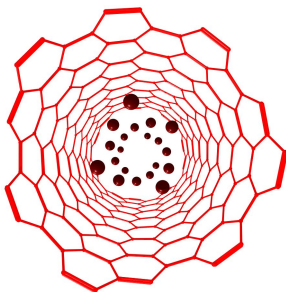

n=20  
a=5.80 Å

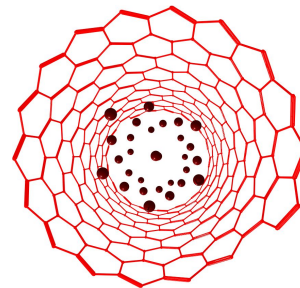

n=30  
a=6.90 Å

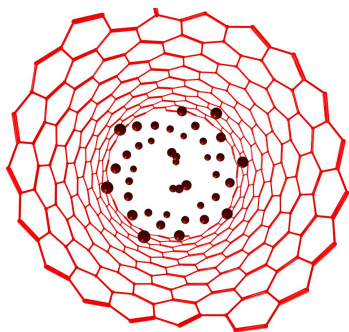

n=40  
a=7.90 Å

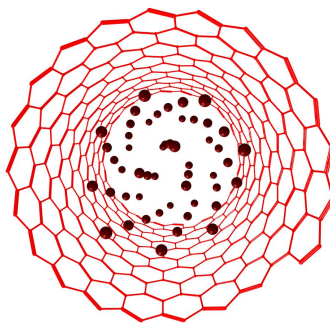

n=50  
a=8.40 Å

$L=30 \text{ \AA}$

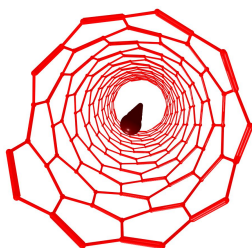

n=10  
a=3.70 Å

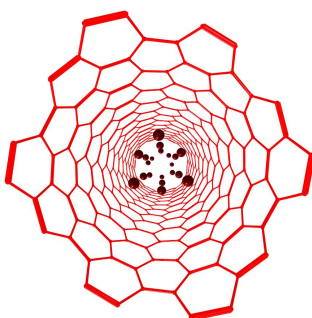

n=20  
a=5.50 Å

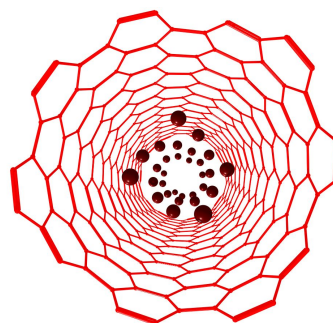

n=30  
a=5.80 Å

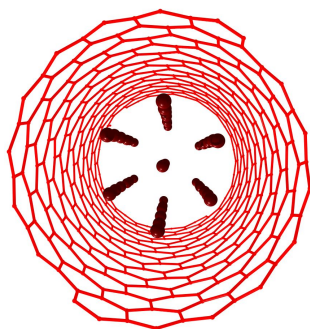

n=40  
a=6.70 Å

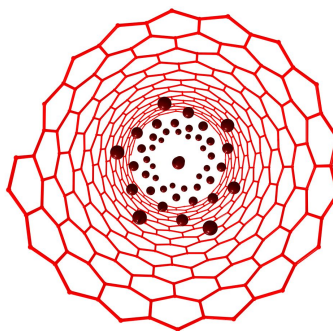

n=50  
a=6.90 Å

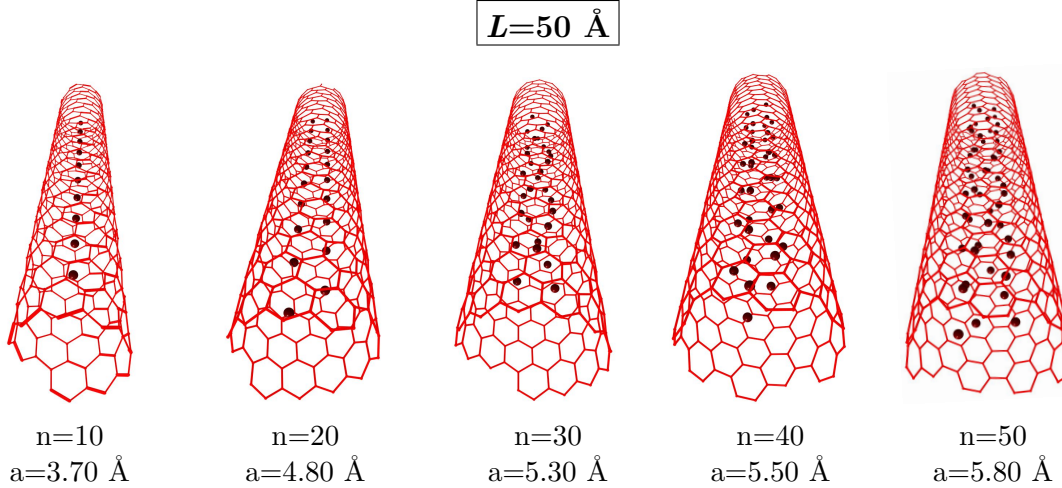

Figure S4: Optimized geometries of Ar clusters of size,  $n = 10, 20, 30, 40$  and  $50$  inside CNTs of length,  $L = 10 \text{ \AA}, 20 \text{ \AA}, 30 \text{ \AA}$  and  $50 \text{ \AA}$ . The optimal CNT radii for each case are also given.

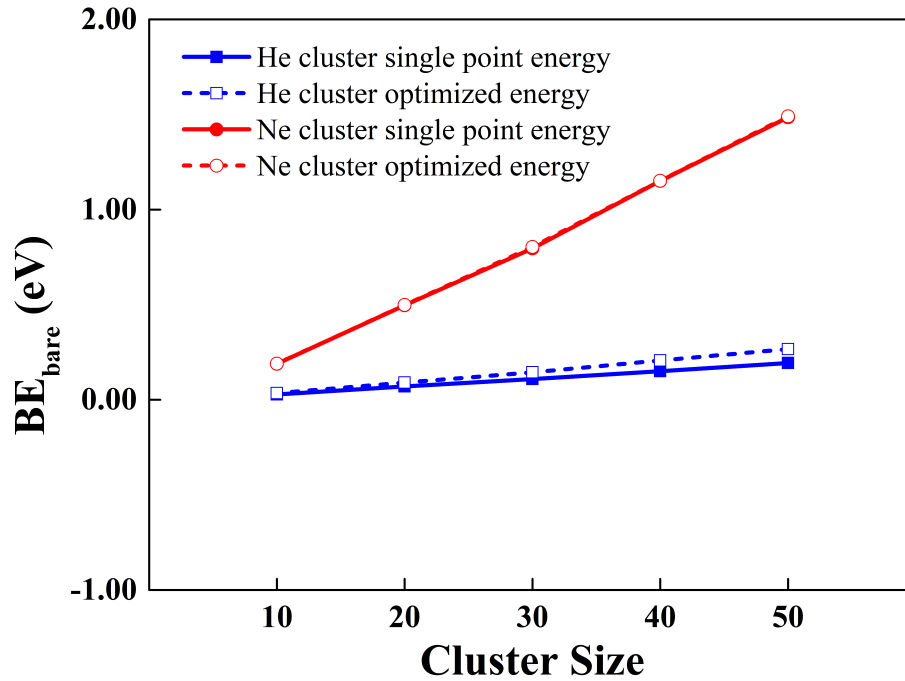

Figure S5: A comparison of the DFT optimized bare cluster binding energies and the single-point energies of the PSO geometries evaluated at the  $\omega$ B97X-D/6-311G(d,p) level. We note that some of the optimized clusters have very small imaginary frequencies.

# Effect of population size, iteration number as well as success rate of the PSO algorithm

We have considered  $\text{He}_{40}$  clusters encapsulated within CNTs of length 20 Å (for illustration purpose) and performed calculations with population sizes of 30, 60 and 90 with maximum iteration number varying from 1000-2500 for analyzing the effect of population size as well as iteration number on the putative global minima. Along with PSO, L-BFGS runs with iteration number varying from 7000-12000 are also carried out. The results from the analysis indicate that there is not much effect of population size as well as iteration number (beyond the numbers that we have originally employed) on the putative global optima.

**Table S5: Effect of population size as well as iteration number on the putative global minima for the encapsulation of  $\text{He}_{40}$  cluster within CNT of length 20 Å.**

| Method    | Cluster size | Atom | Length (Å) | Population size | Max. PSO iteration number | Optimal Radius (Å) | $\text{BE}_{total}$ (eV) |
|-----------|--------------|------|------------|-----------------|---------------------------|--------------------|--------------------------|
| Continuum | 40           | He   | 20         | 30              | 1000                      | 5.60               | 0.9089                   |
|           |              |      |            | 60              | 1000                      | 5.62               | 0.9088                   |
|           |              |      |            | 90              | 1000                      | 5.60               | 0.9089                   |
|           |              |      |            | 30              | 1500                      | 5.61               | 0.9072                   |
|           |              |      |            | 60              | 1500                      | 5.59               | 0.9089                   |
|           |              |      |            | 90              | 1500                      | 5.62               | 0.9090                   |
|           |              |      |            | 30              | 2000                      | 5.60               | 0.9083                   |
|           |              |      |            | 60              | 2000                      | 5.60               | 0.9089                   |
|           |              |      |            | 90              | 2000                      | 5.60               | 0.9089                   |
|           |              |      |            | 30              | 1500                      | 5.60               | 0.9279                   |
|           |              |      |            | 60              | 1500                      | 5.62               | 0.9280                   |
|           |              |      |            | 90              | 1500                      | 5.60               | 0.9282                   |
| Atomistic | 40           | He   | 20         | 30              | 2000                      | 5.61               | 0.9276                   |
|           |              |      |            | 60              | 2000                      | 5.59               | 0.9280                   |
|           |              |      |            | 90              | 2000                      | 5.62               | 0.9282                   |
|           |              |      |            | 30              | 2500                      | 5.60               | 0.9279                   |
|           |              |      |            | 60              | 2500                      | 5.60               | 0.9281                   |
|           |              |      |            | 90              | 2500                      | 5.60               | 0.9282                   |

We now report the percentage success of the PSO algorithm in obtaining the global minima for the encapsulation of noble gas clusters into CNTs. In case of long CNTs (L=30

and 50 Å), the success rate is  $\sim 80-90\%$ . For short CNTs, the success rate for small cluster sizes (10-20 atoms) is  $\sim 80-90\%$ , whereas this decreases to  $\sim 60-80\%$  in the case of large cluster sizes (30-50 atoms). The success rate, in general, diminishes with an increase in the cluster size due to the curse of dimensionality. In case of long CNTs, the cluster geometries tend to show linearity and hence the success rate is higher when compared to the case of short CNTs wherein the cluster geometries are not linear.

# Coordinates for the putative global minima structures of bare clusters

The position coordinates of atoms are in Å units.

**He**

| Cluster size | Atom | x           | y           | z           |
|--------------|------|-------------|-------------|-------------|
| 10           | He   | 2.865634231 | 0.033443469 | 4.426388488 |
|              | He   | 5.127001905 | 4.150069805 | 3.275093901 |
|              | He   | 5.486446013 | 1.497477033 | 4.652711366 |
|              | He   | 2.412474162 | 4.19042731  | 2.089792161 |
|              | He   | 0.391736336 | 4.185144144 | 4.255856597 |
|              | He   | 2.950800696 | 2.913272565 | 4.734594273 |
|              | He   | 1.042231546 | 1.696020514 | 2.787402594 |
|              | He   | 2.918611883 | 5.806819675 | 4.475700089 |
|              | He   | 0.571378137 | 1.533883488 | 5.670710492 |
|              | He   | 3.911495671 | 1.674767355 | 2.193126445 |

**He**

| Cluster size | Atom | x           | y           | z           |
|--------------|------|-------------|-------------|-------------|
| 20           | He   | 3.656118348 | 6.275560383 | 0.562897888 |
|              | He   | 2.231476484 | 3.933130037 | 1.721967656 |
|              | He   | -0.01659228 | 4.809917983 | 3.464816617 |
|              | He   | 6.651270596 | 5.927453876 | 1.251216701 |
|              | He   | 5.252540122 | 3.793660177 | 5.475049622 |
|              | He   | 4.580149626 | 5.065113274 | 2.958565006 |
|              | He   | 3.001443663 | 4.53095793  | 7.354004254 |
|              | He   | 4.951520206 | 3.512470768 | 0.613594743 |
|              | He   | 3.001122042 | 1.844141339 | 5.996572024 |
|              | He   | 2.535536804 | 4.249182471 | 4.57406767  |
|              | He   | 0.385557618 | 3.427017683 | 6.20190241  |
|              | He   | 6.860242184 | 3.384169541 | 2.947375818 |
|              | He   | 2.231828859 | 6.732625303 | 3.136332903 |
|              | He   | 6.860571832 | 6.07099418  | 4.304813099 |
|              | He   | 4.952068047 | 7.873879844 | 2.817069896 |
|              | He   | 4.104732665 | 6.545191677 | 5.412052342 |
|              | He   | 1.107594098 | 1.978493213 | 3.650783391 |
|              | He   | 0.622863855 | 6.152590339 | 0.807080236 |
|              | He   | 4.104195971 | 2.212069141 | 3.222872938 |
|              | He   | 1.108119686 | 6.339899495 | 5.854263126 |



**He**

| Cluster size | Atom | x            | y            | z            |
|--------------|------|--------------|--------------|--------------|
| 30           | He   | 0.965504757  | 4.091951259  | 0.050225606  |
|              | He   | -0.935733029 | -4.079979908 | -0.396144534 |
|              | He   | 0.059202986  | -1.37264458  | -4.969688956 |
|              | He   | 0.776823088  | 1.711955581  | -4.801187936 |
|              | He   | -2.504726453 | 2.000940238  | 3.529146729  |
|              | He   | 2.590216155  | 0.794022044  | 3.923348946  |
|              | He   | 1.881191575  | -2.253908114 | 3.756786799  |
|              | He   | -3.213859355 | -1.046973809 | 3.362621878  |
|              | He   | 3.93548631   | -1.012689325 | 1.775427047  |
|              | He   | -4.185609526 | 0.911164316  | 1.147130187  |
|              | He   | 2.717479554  | -0.425760738 | -3.779022631 |
|              | He   | -2.039240579 | 0.701004163  | -4.14690785  |
|              | He   | 2.244247707  | 2.13778971   | -2.140507986 |
|              | He   | 1.124853789  | -2.673404665 | -2.403339499 |
|              | He   | -1.835775104 | -1.972101369 | -2.632326369 |
|              | He   | -0.716387821 | 2.839152548  | -2.369466287 |
|              | He   | 2.912453929  | 1.813549865  | 1.000941793  |
|              | He   | -3.029276635 | -1.861017304 | 0.364803904  |
|              | He   | -1.908636719 | 2.955644465  | 0.627927165  |
|              | He   | 1.791788261  | -3.003055962 | 0.7377499    |
|              | He   | -0.358387481 | -0.145403636 | 4.187414587  |
|              | He   | 0.350100576  | 2.313380356  | 2.558317885  |
|              | He   | -0.765554961 | -2.48193156  | 2.29634569   |
|              | He   | 2.471065244  | -0.53055695  | -0.812106683 |
|              | He   | -2.300438141 | 0.599757105  | -1.181209852 |
|              | He   | 0.221182501  | 0.089750936  | -2.584586309 |
|              | He   | 1.20937775   | -0.37946433  | 1.795407247  |
|              | He   | -1.498738115 | 0.262064086  | 1.585888647  |
|              | He   | -0.301824612 | -1.377804662 | -0.317227495 |
|              | He   | 0.343214351  | 1.394570239  | -0.165761625 |

**He**

| Cluster size | Atom | x           | y            | z           |
|--------------|------|-------------|--------------|-------------|
|              | He   | 4.576829601 | 6.647269707  | 5.598344392 |
|              | He   | 1.704533874 | 5.96002794   | 5.597152886 |
|              | He   | 7.184916347 | 6.735770877  | 0.67387837  |
|              | He   | 6.168476686 | 0.462135417  | 3.463194181 |
|              | He   | 5.327285366 | 3.524420699  | 8.202409389 |
|              | He   | 5.572332494 | 8.818286207  | 3.939062087 |
|              | He   | 3.080426186 | 2.87736545   | 1.807486658 |
|              | He   | 6.57690492  | 4.609463839  | 5.768168592 |
|              | He   | 5.455005504 | 9.058590954  | 6.93776636  |
|              | He   | 2.35609759  | 5.519478332  | 0.612066997 |
|              | He   | 3.287156502 | 5.637893791  | 8.018608645 |
|              | He   | 3.35308646  | 1.465133275  | 7.317465497 |
|              | He   | 5.760329798 | 1.928371457  | 5.869409502 |
|              | He   | 6.23863438  | 6.055218239  | 3.323347757 |
|              | He   | 7.780658005 | -0.042169578 | 5.941344596 |
|              | He   | 8.326063927 | 8.035731068  | 3.007282195 |
|              | He   | 1.299283075 | 3.547434244  | 7.157315915 |
|              | He   | 1.385854942 | 3.48107784   | 4.127367966 |
|              | He   | 6.032036025 | 0.580764327  | 8.335185224 |
| 40           | He   | 4.790370005 | -0.733360683 | 5.853527965 |
|              | He   | 7.776870759 | 4.038340845  | 1.872205285 |
|              | He   | 7.435170348 | 7.388159746  | 5.671974094 |
|              | He   | 6.132884538 | 6.346920761  | 8.053546748 |
|              | He   | 3.455623528 | 1.408005719  | 4.321332531 |
|              | He   | 1.083251424 | 0.921717475  | 2.714970498 |
|              | He   | 8.123307227 | 2.528311476  | 4.374689397 |
|              | He   | 4.414068139 | 7.497601747  | 1.57487711  |
|              | He   | 2.636856807 | 8.356107008  | 6.900142729 |
|              | He   | 8.891363839 | 5.420527901  | 7.247726987 |
|              | He   | 3.449042393 | 5.354801214  | 3.289414146 |
|              | He   | 3.762571645 | 3.9096522    | 5.738043368 |
|              | He   | 5.116252635 | 4.744544868  | 0.92651862  |
|              | He   | 2.715465245 | 8.10275962   | 3.900249731 |
|              | He   | 0.95003153  | 1.025605557  | 5.686155602 |
|              | He   | 5.831631621 | 1.932710263  | 0.952483921 |
|              | He   | 3.774198007 | 0.019455786  | 1.819858973 |
|              | He   | 5.444483122 | 3.310440814  | 3.435500333 |
|              | He   | 0.680927956 | 6.116271938  | 2.905373367 |
|              | He   | 8.063916029 | 2.614731706  | 7.373497289 |
|              | He   | 8.92634535  | 5.351715319  | 4.22931334  |

He

| Cluster size | Atom | x            | y           | z            |
|--------------|------|--------------|-------------|--------------|
|              | He   | 8.888322957  | 6.660978015 | 4.147452243  |
|              | He   | 8.551279846  | 2.26696743  | 6.118206857  |
|              | He   | -0.599625097 | 3.39128421  | 3.134176274  |
|              | He   | 0.140923125  | 3.150893221 | 5.985554769  |
|              | He   | 7.294280583  | 4.845068516 | 5.58700688   |
|              | He   | 4.358712737  | 8.850464003 | 2.832965872  |
|              | He   | 6.478614952  | 5.23394657  | 2.826263002  |
|              | He   | 6.539170309  | 2.569506001 | 4.125103459  |
|              | He   | 4.44160915   | 3.288751201 | 2.335367781  |
|              | He   | 0.789675899  | 8.232678233 | 6.364270265  |
|              | He   | 0.059820599  | 5.822112928 | 4.75048133   |
|              | He   | 5.743193735  | 2.756445402 | 6.965296825  |
|              | He   | 0.834012949  | 5.561818931 | 7.581760852  |
|              | He   | 3.257777432  | 4.882758451 | 0.221836556  |
|              | He   | 5.111885323  | 5.585432772 | 7.395463996  |
|              | He   | 0.927162674  | 2.884201268 | 8.818298659  |
|              | He   | 1.789755797  | 2.656342742 | 1.437199084  |
|              | He   | 3.886530699  | 1.700251172 | 4.843546927  |
|              | He   | 8.066843291  | 4.321422969 | 8.234744607  |
|              | He   | 10.09365816  | 4.818028747 | 6.107993548  |
|              | He   | 0.970710155  | 5.544746461 | 1.947075012  |
|              | He   | 8.534680777  | 0.670213449 | 3.570732919  |
|              | He   | 3.681855135  | 6.063187113 | 2.836391303  |
|              | He   | 5.342275983  | 0.500516652 | 2.574222494  |
|              | He   | 2.79954228   | 6.300693968 | 5.598732851  |
| 50           | He   | 9.023974635  | 3.790576867 | 3.471072356  |
|              | He   | 6.316807292  | 0.177433678 | 5.598651088  |
|              | He   | 5.266763164  | 7.047417267 | 0.650442526  |
|              | He   | 8.665030515  | 5.768855452 | 1.182433081  |
|              | He   | 3.537647124  | 9.060821262 | 5.616252392  |
|              | He   | 2.87992883   | 3.657807129 | 6.816921641  |
|              | He   | 7.340984776  | 2.365599364 | 1.446956297  |
|              | He   | 6.673988646  | 6.613600198 | 9.549496784  |
|              | He   | 2.102985401  | 3.916718366 | 4.01979869   |
|              | He   | 5.684900703  | 3.835213779 | 9.717994726  |
|              | He   | 3.038175921  | 4.877911101 | 9.395625212  |
|              | He   | 1.639422182  | 7.984093175 | 3.560926533  |
|              | He   | 3.708334233  | 1.887214991 | 8.899995691  |
|              | He   | 7.134734511  | 8.10055335  | 2.48574177   |
|              | He   | 5.718696546  | 8.444324006 | 7.433558795  |
|              | He   | 6.115249638  | 4.435874738 | 0.019711009  |
|              | He   | 4.68464395   | 4.428408188 | 4.877695692  |
|              | He   | 2.471247078  | 7.746082968 | 0.767866657  |
|              | He   | 5.596328116  | 7.099916895 | 4.858110435  |
|              | He   | 8.218999706  | 7.040444687 | 7.057654758  |
|              | He   | 1.887822058  | 0.931156826 | 6.799804342  |
|              | He   | 7.523309806  | 9.175959599 | 5.177447259  |
|              | He   | 1.176457933  | 1.193082821 | 3.950653     |
|              | He   | 4.568678018  | 1.90262886  | -0.086681393 |
|              | He   | 3.047742843  | 7.523310577 | 8.166442392  |

## Ne

| Cluster size | Atom | x           | y           | z           |
|--------------|------|-------------|-------------|-------------|
| 10           | Ne   | 3.012172345 | 0.035153646 | 4.652737899 |
|              | Ne   | 5.389178139 | 4.362289283 | 3.442570294 |
|              | Ne   | 5.767002912 | 1.574052563 | 4.890634106 |
|              | Ne   | 2.535839318 | 4.404710525 | 2.196656533 |
|              | Ne   | 0.411768308 | 4.399157197 | 4.473485628 |
|              | Ne   | 3.101693913 | 3.06224673  | 4.976704207 |
|              | Ne   | 1.095527477 | 1.782748835 | 2.929940226 |
|              | Ne   | 3.067859082 | 6.103759317 | 4.704571116 |
|              | Ne   | 0.600596337 | 1.612320712 | 5.960690005 |
|              | Ne   | 4.111515336 | 1.760408868 | 2.305274956 |

## Ne

| Cluster size | Atom | x            | y           | z           |
|--------------|------|--------------|-------------|-------------|
| 20           | Ne   | 3.843078946  | 6.596469721 | 0.591682439 |
|              | Ne   | 2.345586077  | 4.134256005 | 1.81002282  |
|              | Ne   | -0.017440748 | 5.055879698 | 3.64199474  |
|              | Ne   | 6.991392388  | 6.230562312 | 1.315199373 |
|              | Ne   | 5.521135924  | 3.987654164 | 5.75502375  |
|              | Ne   | 4.814361823  | 5.324124749 | 3.109855262 |
|              | Ne   | 3.154926578  | 4.762654642 | 7.730061289 |
|              | Ne   | 5.204722944  | 3.692085751 | 0.644971747 |
|              | Ne   | 3.15458851   | 1.938444021 | 6.303214911 |
|              | Ne   | 2.665194936  | 4.466470211 | 4.807968858 |
|              | Ne   | 0.405273633  | 3.602262905 | 6.519045147 |
|              | Ne   | 7.211050023  | 3.557223665 | 3.0980939   |
|              | Ne   | 2.345956471  | 7.076907278 | 3.296713563 |
|              | Ne   | 7.211396528  | 6.381442746 | 4.524945587 |
|              | Ne   | 5.205298799  | 8.276521427 | 2.961124607 |
|              | Ne   | 4.314633767  | 6.879888979 | 5.688805019 |
|              | Ne   | 1.164232433  | 2.079666161 | 3.837471178 |
|              | Ne   | 0.654714848  | 6.467211436 | 0.848351384 |
|              | Ne   | 4.314069629  | 2.325186313 | 3.387678941 |
|              | Ne   | 1.164784897  | 6.664098901 | 6.153628854 |

Ne

| Cluster size | Atom | x            | y            | z            |
|--------------|------|--------------|--------------|--------------|
|              | Ne   | 1.01487716   | 4.301198767  | 0.052793961  |
|              | Ne   | -0.983583014 | -4.288615244 | -0.416401925 |
|              | Ne   | 0.062230411  | -1.442836632 | -5.223820777 |
|              | Ne   | 0.816546996  | 1.799498764  | -5.046703228 |
|              | Ne   | -2.632809055 | 2.103261046  | 3.709614459  |
|              | Ne   | 2.72267039   | 0.834625444  | 4.123974744  |
|              | Ne   | 1.977388871  | -2.369164779 | 3.948895214  |
|              | Ne   | -3.378204436 | -1.100512242 | 3.534574134  |
|              | Ne   | 4.136732769  | -1.064474575 | 1.86621593   |
|              | Ne   | -4.399646377 | 0.957757946  | 1.205790253  |
|              | Ne   | 2.856441577  | -0.447532594 | -3.972268106 |
|              | Ne   | -2.143519927 | 0.736850967  | -4.358965638 |
|              | Ne   | 2.359010374  | 2.247108502  | -2.249965781 |
|              | Ne   | 1.182374721  | -2.810112858 | -2.526237542 |
| 30           | Ne   | -1.929649967 | -2.072947462 | -2.766933967 |
|              | Ne   | -0.753021289 | 2.984336485  | -2.490632177 |
|              | Ne   | 3.061386232  | 1.906288211  | 1.052126317  |
|              | Ne   | -3.184182827 | -1.956182961 | 0.383458649  |
|              | Ne   | -2.006237461 | 3.106785375  | 0.660037077  |
|              | Ne   | 1.883413798  | -3.156621323 | 0.775475747  |
|              | Ne   | -0.376714114 | -0.152839049 | 4.401543742  |
|              | Ne   | 0.368003446  | 2.431678215  | 2.689140959  |
|              | Ne   | -0.804702658 | -2.608848514 | 2.413772458  |
|              | Ne   | 2.597426535  | -0.557687703 | -0.853634866 |
|              | Ne   | -2.418074183 | 0.630426502  | -1.241612628 |
|              | Ne   | 0.23249297   | 0.094340472  | -2.716752655 |
|              | Ne   | 1.271220931  | -0.398868756 | 1.887217845  |
|              | Ne   | -1.575378132 | 0.275465091  | 1.666985226  |
|              | Ne   | -0.317258825 | -1.448260582 | -0.333449355 |
|              | Ne   | 0.360765085  | 1.46588349   | -0.174238071 |

## Ne

| Cluster size | Atom | x           | y            | z           |
|--------------|------|-------------|--------------|-------------|
|              | Ne   | 4.810872023 | 6.987186908  | 5.884623366 |
|              | Ne   | 1.791697538 | 6.264802096  | 5.883370931 |
|              | Ne   | 7.552326842 | 7.080213706  | 0.708338059 |
|              | Ne   | 6.483910153 | 0.485767342  | 3.640289338 |
|              | Ne   | 5.599703367 | 3.704646758  | 8.621850779 |
|              | Ne   | 5.857281314 | 9.269221297  | 4.140491398 |
|              | Ne   | 3.23794798  | 3.024503456  | 1.899914953 |
|              | Ne   | 6.913223922 | 4.845175058  | 6.063131758 |
|              | Ne   | 5.733954649 | 9.521814355  | 7.292538503 |
|              | Ne   | 2.476579853 | 5.801724383  | 0.643365877 |
|              | Ne   | 3.455249732 | 5.926195178  | 8.428651133 |
|              | Ne   | 3.524551109 | 1.540054863  | 7.691654074 |
|              | Ne   | 6.054892117 | 2.026981361  | 6.16954976  |
|              | Ne   | 6.557655457 | 6.364860081  | 3.493291676 |
|              | Ne   | 8.178532563 | -0.044325977 | 6.245163354 |
|              | Ne   | 8.75182856  | 8.446649134  | 3.161063671 |
|              | Ne   | 1.365723687 | 3.728837131  | 7.523315024 |
|              | Ne   | 1.456722524 | 3.659087502  | 4.338426555 |
|              | Ne   | 6.340492413 | 0.610462502  | 8.761416287 |
|              | Ne   | 5.035332107 | -0.770862081 | 6.1528561   |
| 40           | Ne   | 8.17455165  | 4.24484691   | 1.967943055 |
|              | Ne   | 7.815377922 | 7.765963369  | 5.962018224 |
|              | Ne   | 6.446497951 | 6.671479209  | 8.465375843 |
|              | Ne   | 3.63233155  | 1.480006012  | 4.542309763 |
|              | Ne   | 1.138644963 | 0.968850755  | 2.853804216 |
|              | Ne   | 8.538703619 | 2.657600131  | 4.598395104 |
|              | Ne   | 4.639787532 | 7.881001836  | 1.655410598 |
|              | Ne   | 2.771696076 | 8.783407934  | 7.252990936 |
|              | Ne   | 9.346035854 | 5.697713987  | 7.61834939  |
|              | Ne   | 3.625413878 | 5.628626276  | 3.457622823 |
|              | Ne   | 3.954975877 | 4.109577597  | 6.03146604  |
|              | Ne   | 5.37787919  | 4.987163639  | 0.973897414 |
|              | Ne   | 2.854324263 | 8.517105283  | 4.099694319 |
|              | Ne   | 0.998612687 | 1.078051295  | 5.976924923 |
|              | Ne   | 6.129840056 | 2.031542038  | 1.001190486 |
|              | Ne   | 3.967196769 | 0.020450684  | 1.912919943 |
|              | Ne   | 5.722894191 | 3.479724719  | 3.611179328 |
|              | Ne   | 0.715748136 | 6.429035844  | 3.053943596 |
|              | Ne   | 8.476275371 | 2.748439577  | 7.750551128 |
|              | Ne   | 9.382806192 | 5.62538258   | 4.445585045 |

Ne

| Cluster size | Atom | x            | y           | z            |
|--------------|------|--------------|-------------|--------------|
|              | Ne   | 9.342839472  | 7.001596209 | 4.359537869  |
|              | Ne   | 8.988561202  | 2.382891901 | 6.431069708  |
|              | Ne   | -0.630287744 | 3.564702152 | 3.294446651  |
|              | Ne   | 0.148129421  | 3.312018442 | 6.291634274  |
|              | Ne   | 7.667283567  | 5.092827701 | 5.872706096  |
|              | Ne   | 4.581601456  | 9.303044549 | 2.977833445  |
|              | Ne   | 6.809907762  | 5.501591565 | 2.970787815  |
|              | Ne   | 6.8735597    | 2.700901194 | 4.33604625   |
|              | Ne   | 4.668736891  | 3.456925979 | 2.454789997  |
|              | Ne   | 0.830057053  | 8.653667461 | 6.689715904  |
|              | Ne   | 0.062879607  | 6.119834612 | 4.993403671  |
|              | Ne   | 6.036879778  | 2.897399996 | 7.321476776  |
|              | Ne   | 0.876661338  | 5.846230127 | 7.969464532  |
|              | Ne   | 3.424368324  | 5.132444963 | 0.233180471  |
|              | Ne   | 5.37328855   | 5.871051494 | 7.773641132  |
|              | Ne   | 0.974574402  | 3.031688833 | 9.269234386  |
|              | Ne   | 1.8812774    | 2.79217845  | 1.510692219  |
|              | Ne   | 4.085273746  | 1.787195834 | 5.091228304  |
|              | Ne   | 8.479352323  | 4.542404825 | 8.655839502  |
|              | Ne   | 10.60981113  | 5.064405217 | 6.420334127  |
|              | Ne   | 1.020348743  | 5.828284632 | 2.046641348  |
|              | Ne   | 8.971113317  | 0.704485727 | 3.753327216  |
|              | Ne   | 3.870131818  | 6.373236454 | 2.98143404   |
|              | Ne   | 5.61546055   | 0.526111253 | 2.705858871  |
| 50           | Ne   | 2.942700692  | 6.622888546 | 5.88503169   |
|              | Ne   | 9.485427883  | 3.984413184 | 3.648570375  |
|              | Ne   | 6.639825847  | 0.186506991 | 5.884945746  |
|              | Ne   | 5.53608628   | 7.407796559 | 0.683703791  |
|              | Ne   | 9.108128666  | 6.063853743 | 1.242898409  |
|              | Ne   | 3.718549533  | 9.524158713 | 5.903447117  |
|              | Ne   | 3.027197918  | 3.844854085 | 7.165514225  |
|              | Ne   | 7.716376043  | 2.486567513 | 1.520948381  |
|              | Ne   | 7.015272156  | 6.951795662 | 10.03782332  |
|              | Ne   | 2.210524427  | 4.117005101 | 4.225356578  |
|              | Ne   | 5.975605852  | 4.031332666 | 10.21493764  |
|              | Ne   | 3.19353719   | 5.127349737 | 9.87608332   |
|              | Ne   | 1.723256271  | 8.392370667 | 3.743019367  |
|              | Ne   | 3.897964961  | 1.983720303 | 9.355109107  |
|              | Ne   | 7.499578889  | 8.514786191 | 2.612853565  |
|              | Ne   | 6.011129892  | 8.876136029 | 7.81368396   |
|              | Ne   | 6.427961268  | 4.662709242 | 0.020718958  |
|              | Ne   | 4.924199607  | 4.65486088  | 5.127123313  |
|              | Ne   | 2.597617667  | 8.142189484 | 0.807132566  |
|              | Ne   | 5.882503986  | 7.462980827 | 5.106536537  |
|              | Ne   | 8.639289464  | 7.400467426 | 7.418557559  |
|              | Ne   | 1.984358414  | 0.9787728   | 7.147521609  |
|              | Ne   | 7.908024512  | 9.645184806 | 5.442203084  |
|              | Ne   | 1.236617714  | 1.254092738 | 4.152675029  |
|              | Ne   | 4.802303598  | 1.999922382 | -0.091113964 |
|              | Ne   | 3.203593329  | 7.908025322 | 8.58404456   |

**Ar**

| Cluster size | Atom | x           | y           | z           |
|--------------|------|-------------|-------------|-------------|
| 10           | Ar   | 3.69058954  | 0.043071134 | 5.70065184  |
|              | Ar   | 6.602956999 | 5.34478687  | 4.217923964 |
|              | Ar   | 7.065877442 | 1.928568906 | 5.992128274 |
|              | Ar   | 3.1069743   | 5.396762445 | 2.691398995 |
|              | Ar   | 0.504508917 | 5.389958367 | 5.481027436 |
|              | Ar   | 3.800273624 | 3.75194194  | 6.097583533 |
|              | Ar   | 1.3422679   | 2.184268843 | 3.589836674 |
|              | Ar   | 3.758818334 | 7.478479884 | 5.764159206 |
|              | Ar   | 0.735865782 | 1.975456007 | 7.303187754 |
|              | Ar   | 5.037532304 | 2.156897352 | 2.824481027 |

**Ar**

| Cluster size | Atom | x            | y           | z           |
|--------------|------|--------------|-------------|-------------|
| 20           | Ar   | 4.708637267  | 8.0821611   | 0.72494425  |
|              | Ar   | 2.873871229  | 5.065394745 | 2.217685617 |
|              | Ar   | -0.021368844 | 6.194591342 | 4.462263826 |
|              | Ar   | 8.566030313  | 7.633842112 | 1.611415448 |
|              | Ar   | 6.764635006  | 4.885774471 | 7.05120027  |
|              | Ar   | 5.898677549  | 6.523251945 | 3.810273114 |
|              | Ar   | 3.865495627  | 5.835324606 | 9.471066084 |
|              | Ar   | 6.376957841  | 4.523636596 | 0.790235654 |
|              | Ar   | 3.865081418  | 2.375030512 | 7.722857909 |
|              | Ar   | 3.265464066  | 5.47243197  | 5.890844727 |
|              | Ar   | 0.496551478  | 4.413583379 | 7.987298558 |
|              | Ar   | 8.835160389  | 4.358400166 | 3.795862796 |
|              | Ar   | 2.874325046  | 8.670805314 | 4.039216618 |
|              | Ar   | 8.835584935  | 7.818704626 | 5.544077476 |
|              | Ar   | 6.377663393  | 10.14060283 | 3.628044564 |
|              | Ar   | 5.286398129  | 8.429413524 | 6.970067411 |
|              | Ar   | 1.426446945  | 2.548059441 | 4.701766488 |
|              | Ar   | 0.802173147  | 7.923790588 | 1.039421516 |
|              | Ar   | 5.285706933  | 2.848876924 | 4.150669693 |
|              | Ar   | 1.427123838  | 8.165022077 | 7.539581299 |



**Ar**

| Cluster size | Atom | x            | y            | z            |
|--------------|------|--------------|--------------|--------------|
| 30           | Ar   | 3.335884442  | 1.022604147  | 5.052797885  |
|              | Ar   | 2.422746725  | -2.90276045  | 4.838286029  |
|              | Ar   | -4.139061291 | -1.34837536  | 4.330649389  |
|              | Ar   | 5.068429338  | -1.304221101 | 2.286534833  |
|              | Ar   | -5.390557723 | 1.173469195  | 1.477364635  |
|              | Ar   | 3.499784274  | -0.548328223 | -4.866923085 |
|              | Ar   | -2.626294686 | 0.902808392  | -5.340714655 |
|              | Ar   | 2.890319016  | 2.753214021  | -2.756714831 |
|              | Ar   | 1.448675334  | -3.443021159 | -3.095209961 |
|              | Ar   | -2.364255816 | -2.539827521 | -3.390117293 |
|              | Ar   | -0.922620679 | 3.656484342  | -3.05158537  |
|              | Ar   | 3.750887636  | 2.335632402  | 1.289091703  |
|              | Ar   | -3.901341121 | -2.396764709 | 0.46982321   |
|              | Ar   | -2.458092745 | 3.806511811  | 0.808694077  |
|              | Ar   | 2.307606094  | -3.867572072 | 0.950132447  |
|              | Ar   | -0.461559635 | -0.187262258 | 5.392882423  |
|              | Ar   | 0.450887105  | 2.979353489  | 3.294803337  |
|              | Ar   | -0.985941996 | -3.196427009 | 2.957414904  |
|              | Ar   | 3.182432512  | -0.683293042 | -1.045894971 |
|              | Ar   | -2.962685485 | 0.772414453  | -1.521255112 |
|              | Ar   | 0.284856251  | 0.115588326  | -3.328633883 |
|              | Ar   | 1.557531951  | -0.488704061 | 2.31226691   |
|              | Ar   | -1.930193027 | 0.337506778  | 2.042432349  |
|              | Ar   | -0.388713515 | -1.774445398 | -0.408550562 |
|              | Ar   | 0.442018482  | 1.796037429  | -0.21348088  |

## Ar

| Cluster size | Atom | x           | y            | z           |
|--------------|------|-------------|--------------|-------------|
|              | Ar   | 5.894401758 | 8.560877653  | 7.209988989 |
|              | Ar   | 2.19523302  | 7.675793559  | 7.208454474 |
|              | Ar   | 9.253301356 | 8.674856432  | 0.867873658 |
|              | Ar   | 7.944250278 | 0.595174401  | 4.460174324 |
|              | Ar   | 6.860897819 | 4.539026658  | 10.56370906 |
|              | Ar   | 7.176488817 | 11.35688375  | 5.073034506 |
|              | Ar   | 3.967215543 | 3.705697928  | 2.327823726 |
|              | Ar   | 8.470256336 | 5.936430701  | 7.428701974 |
|              | Ar   | 7.025385876 | 11.66636714  | 8.93500213  |
|              | Ar   | 3.034368108 | 7.108419064  | 0.788268102 |
|              | Ar   | 4.233459131 | 7.260923822  | 10.32699598 |
|              | Ar   | 4.318368926 | 1.886914066  | 9.424008595 |
|              | Ar   | 7.418606558 | 2.483508695  | 7.559087995 |
|              | Ar   | 8.034604884 | 7.798387126  | 4.280069081 |
|              | Ar   | 10.0205444  | -0.054309306 | 7.651731677 |
|              | Ar   | 10.72296112 | 10.34904759  | 3.873014948 |
|              | Ar   | 1.673319112 | 4.568665314  | 9.217755345 |
|              | Ar   | 1.784813182 | 4.483206309  | 5.315549653 |
|              | Ar   | 7.768531245 | 0.747954057  | 10.73470824 |
| 40           | Ar   | 6.169415915 | -0.944479667 | 7.538634501 |
|              | Ar   | 10.01566689 | 5.200893512  | 2.411173473 |
|              | Ar   | 9.575598175 | 9.515054218  | 7.304815121 |
|              | Ar   | 7.898411905 | 8.174064616  | 10.37199202 |
|              | Ar   | 4.450424241 | 1.813340699  | 5.565352502 |
|              | Ar   | 1.395096531 | 1.187060384  | 3.496552914 |
|              | Ar   | 10.46183507 | 3.256158719  | 5.634069677 |
|              | Ar   | 5.684784724 | 9.65600225   | 2.028250823 |
|              | Ar   | 3.395951949 | 10.76165296  | 8.886547454 |
|              | Ar   | 11.45099888 | 6.980982903  | 9.334193847 |
|              | Ar   | 4.441948536 | 6.896334897  | 4.236366703 |
|              | Ar   | 4.845736209 | 5.035158137  | 7.389904337 |
|              | Ar   | 6.589113242 | 6.110398693  | 1.193243678 |
|              | Ar   | 3.497190088 | 10.43537224  | 5.023048896 |
|              | Ar   | 1.223525455 | 1.320855641  | 7.323079184 |
|              | Ar   | 7.510434663 | 2.489096551  | 1.226683838 |
|              | Ar   | 4.860709555 | 0.025056694  | 2.343757769 |
|              | Ar   | 7.011834324 | 4.263446503  | 4.424508005 |
|              | Ar   | 0.876952671 | 7.87701689   | 3.74176873  |
|              | Ar   | 10.3853464  | 3.3674575    | 9.496170751 |
|              | Ar   | 11.49605083 | 6.892360639  | 5.446842938 |

## Ar

| Cluster size | Atom | x            | y           | z            |
|--------------|------|--------------|-------------|--------------|
|              | Ar   | 11.4470826   | 8.578532292 | 5.341415767  |
|              | Ar   | 11.01301192  | 2.919579266 | 7.879508831  |
|              | Ar   | -0.772244443 | 4.367562997 | 4.03643914   |
|              | Ar   | 0.181491903  | 4.057968542 | 7.70866902   |
|              | Ar   | 9.394149235  | 6.239860967 | 7.195387649  |
|              | Ar   | 5.613493676  | 11.39832485 | 3.648516653  |
|              | Ar   | 8.343670771  | 6.740688764 | 3.63988417   |
|              | Ar   | 8.421658732  | 3.309212274 | 5.312633243  |
|              | Ar   | 5.720254209  | 4.235512911 | 3.007670627  |
|              | Ar   | 1.01700684   | 10.60269166 | 8.196408675  |
|              | Ar   | 0.077041681  | 7.498175741 | 6.118044137  |
|              | Ar   | 7.396537386  | 3.549967563 | 8.970458032  |
|              | Ar   | 1.074107585  | 7.162948624 | 9.764388976  |
|              | Ar   | 4.195622451  | 6.288401036 | 0.285698595  |
|              | Ar   | 6.583488674  | 7.193360389 | 9.524461207  |
|              | Ar   | 1.194073141  | 3.714501633 | 11.35689979  |
|              | Ar   | 2.304988526  | 3.42104747  | 1.850938214  |
|              | Ar   | 5.005380446  | 2.189717418 | 6.237901345  |
|              | Ar   | 10.38911636  | 5.565468975 | 10.6053529   |
|              | Ar   | 12.99940823  | 6.205037023 | 7.866355327  |
|              | Ar   | 1.250157018  | 7.140961351 | 2.507596607  |
|              | Ar   | 10.99163433  | 0.863153684 | 4.598671184  |
|              | Ar   | 4.741783128  | 7.80865007  | 3.652928193  |
|              | Ar   | 6.880203917  | 0.644604778 | 3.315286545  |
| 50           | Ar   | 3.605471118  | 8.11453011  | 7.210489278  |
|              | Ar   | 11.62178551  | 4.881803541 | 4.470320459  |
|              | Ar   | 8.135282119  | 0.22851307  | 7.210383977  |
|              | Ar   | 6.782952559  | 9.076219207 | 0.837691131  |
|              | Ar   | 11.159509    | 7.429586568 | 1.522830483  |
|              | Ar   | 4.556060689  | 11.6692395  | 7.233052324  |
|              | Ar   | 3.708999251  | 4.710812212 | 8.77936878   |
|              | Ar   | 9.454298575  | 3.046605241 | 1.863504323  |
|              | Ar   | 8.595288407  | 8.517515406 | 12.29859434  |
|              | Ar   | 2.708390289  | 5.044258502 | 5.177013465  |
|              | Ar   | 7.321463026  | 4.939290474 | 12.51559927  |
|              | Ar   | 3.912802323  | 6.282158236 | 12.10042641  |
|              | Ar   | 2.111377053  | 10.28254424 | 4.586041747  |
|              | Ar   | 4.775884997  | 2.430504155 | 11.46211566  |
|              | Ar   | 9.188673233  | 10.43253083 | 3.201334098  |
|              | Ar   | 7.364987976  | 10.87526577 | 9.57352269   |
|              | Ar   | 7.875700292  | 5.712868981 | 0.02538539   |
|              | Ar   | 6.033253573  | 5.70325297  | 6.281880816  |
|              | Ar   | 3.182666691  | 9.976015944 | 0.98891918   |
|              | Ar   | 7.207392271  | 9.143832365 | 6.256657379  |
|              | Ar   | 10.58507538  | 9.067239369 | 9.089403856  |
|              | Ar   | 2.431285985  | 1.199217124 | 8.757323773  |
|              | Ar   | 9.689111114  | 11.81752373 | 6.667924499  |
|              | Ar   | 1.515135217  | 1.536546057 | 5.087962198  |
|              | Ar   | 5.883903507  | 2.450355351 | -0.111635127 |
|              | Ar   | 3.925123358  | 9.689112106 | 10.51738793  |

# Coordinates for the putative global minima structures of confined clusters from atomistic approach

The CNT lengths as well as position coordinates of atoms are in Å units.

**He**

| Length | Cluster size | Atom | x            | y            | z           |
|--------|--------------|------|--------------|--------------|-------------|
|        |              | He   | 0.358874379  | 1.395799172  | 3.045489838 |
|        |              | He   | 1.294405458  | -0.558028474 | 1.372334469 |
|        |              | He   | -1.427445803 | 0.33421289   | 4.728082025 |
|        |              | He   | 0.693599093  | -1.289417804 | 3.877364077 |
| 10     | 10           | He   | 1.425139985  | -0.197509538 | 8.019847644 |
|        |              | He   | -1.298649924 | -0.619351626 | 2.199998977 |
|        |              | He   | -1.06507538  | -0.92337196  | 8.847388205 |
|        |              | He   | -0.270931549 | -1.438874081 | 6.34244428  |
|        |              | He   | -0.764307537 | 1.22186026   | 7.174307272 |
|        |              | He   | 1.25945923   | 0.750437739  | 5.491777267 |

**He**

| Length | Cluster size | Atom | x            | y            | z           |
|--------|--------------|------|--------------|--------------|-------------|
| 10     | 20           | He   | 0.906318789  | -2.204642994 | 1.70931613  |
|        |              | He   | 1.86247247   | 1.576439583  | 3.973321149 |
|        |              | He   | -2.450071904 | -0.052022921 | 3.935402223 |
|        |              | He   | -1.945942074 | 1.448038463  | 6.27352346  |
|        |              | He   | 0.620104673  | 2.285456486  | 1.629051003 |
|        |              | He   | -1.836349435 | -1.493745659 | 1.675598403 |
|        |              | He   | 2.059317248  | -1.28351715  | 3.969191277 |
|        |              | He   | -0.672827815 | -2.337290701 | 3.954167236 |
|        |              | He   | -0.73926077  | -2.239786859 | 8.469967018 |
|        |              | He   | -2.372260845 | 0.082706364  | 8.534245123 |
|        |              | He   | 2.442090928  | 0.117632961  | 6.265839648 |
|        |              | He   | 1.953699337  | -1.303937194 | 8.530464588 |
|        |              | He   | -0.002790935 | 0.008154866  | 5.094459382 |
|        |              | He   | 0.851905044  | -2.290407594 | 6.238504327 |
|        |              | He   | 1.810626562  | 1.500921599  | 8.597433794 |
|        |              | He   | -1.957246292 | -1.439856123 | 6.230854203 |
|        |              | He   | -1.983180928 | 1.282136905  | 1.610682727 |
|        |              | He   | 2.390029191  | 0.158373608  | 1.661413451 |
|        |              | He   | 0.650197936  | 2.340635614  | 6.305889954 |
|        |              | He   | -0.873186654 | 2.289320075  | 3.928010591 |

**He**

| Length | Cluster size | Atom | x            | y            | z           |
|--------|--------------|------|--------------|--------------|-------------|
| 10     | 30           | He   | 3.398089055  | -0.111934452 | 4.402686471 |
|        |              | He   | 3.264486284  | 0.93180218   | 7.351911444 |
|        |              | He   | 2.924569226  | 1.628804797  | 2.451674271 |
|        |              | He   | -2.934916208 | -1.681649973 | 8.969576477 |
|        |              | He   | -2.112775338 | -2.697588358 | 6.502742814 |
|        |              | He   | 2.952307213  | -1.712567989 | 6.453425695 |
|        |              | He   | -0.998401414 | 3.225660844  | 9.357320477 |
|        |              | He   | -0.882697381 | 0.081154705  | 7.915260743 |
|        |              | He   | 0.699254807  | -3.340534516 | 6.349668204 |
|        |              | He   | 2.072520802  | 2.663029161  | 9.313608103 |
|        |              | He   | -2.356229028 | 2.469898367  | 7.103904812 |
|        |              | He   | -0.679616347 | -3.311270848 | 8.714862804 |
|        |              | He   | 0.623147171  | 3.358493909  | 7.126635628 |
|        |              | He   | -3.130277685 | -1.393957128 | 4.382997943 |
|        |              | He   | -0.826220564 | -3.303767879 | 4.150760859 |
|        |              | He   | 2.012641967  | -2.68352145  | 8.737776587 |
|        |              | He   | -3.117553541 | 1.458333379  | 4.669429929 |
|        |              | He   | -3.43059192  | -0.171589263 | 6.790363169 |
|        |              | He   | -2.275841522 | -2.502358018 | 2.009286903 |
|        |              | He   | 0.937853148  | 0.108799157  | 5.761870829 |
|        |              | He   | -1.973166182 | 2.736310907  | 2.513169643 |
|        |              | He   | 0.814250642  | 3.307105593  | 3.035783484 |
|        |              | He   | 3.128609545  | -1.298322704 | 1.855726298 |
|        |              | He   | 2.384380969  | 2.463734705  | 5.192753072 |
|        |              | He   | -1.002793838 | 3.276216834  | 4.98472962  |
|        |              | He   | -3.367008685 | 0.219870968  | 2.207351177 |
|        |              | He   | 2.089149107  | -2.703940051 | 4.029677729 |
|        |              | He   | -0.855926799 | 0.119722205  | 3.567274995 |
|        |              | He   | 0.600188198  | -3.321836603 | 1.802408762 |
|        |              | He   | -3.189461421 | 1.145443532  | 9.279508802 |

**He**

| Length | Cluster size | Atom | x            | y            | z           |
|--------|--------------|------|--------------|--------------|-------------|
|        |              | He   | -0.415545458 | 3.944892309  | 1.920109251 |
|        |              | He   | -1.467351485 | -0.813555792 | 6.649862223 |
|        |              | He   | -2.261530319 | 3.383857772  | 3.839075065 |
|        |              | He   | -1.657316634 | 3.723619742  | 6.463194242 |
|        |              | He   | -1.706401442 | -3.677118786 | 7.21037684  |
|        |              | He   | -0.935661472 | 3.884571541  | 9.028332552 |
|        |              | He   | 0.751574068  | -1.367664732 | 8.104603623 |
|        |              | He   | -4.029882167 | -0.190470232 | 3.951948669 |
|        |              | He   | 3.409478136  | 2.181693616  | 7.80254394  |
|        |              | He   | 3.944703251  | 0.987501535  | 3.245749882 |
|        |              | He   | -1.297221653 | -0.852822296 | 3.696182426 |
|        |              | He   | 1.751086779  | -3.669893351 | 4.004604098 |
|        |              | He   | -3.615029416 | 1.841136026  | 5.665625412 |
|        |              | He   | 1.336421141  | 0.97806954   | 6.622713564 |
|        |              | He   | -0.226544953 | -3.962034498 | 2.099426291 |
|        |              | He   | 1.120913425  | 3.880141473  | 7.052130858 |
|        |              | He   | -4.033542706 | -0.286087123 | 7.339086342 |
|        |              | He   | 3.928720956  | -0.577142556 | 8.341455383 |
|        |              | He   | 3.832403266  | -1.068176182 | 1.252788631 |
| 10     | 40           | He   | 3.274790269  | -2.400328157 | 6.343091014 |
|        |              | He   | 0.387695017  | 4.018144795  | 4.515764795 |
|        |              | He   | -3.266926246 | 2.320621984  | 8.317284062 |
|        |              | He   | 4.0301584    | 0.267099037  | 5.794855151 |
|        |              | He   | -0.999511155 | -3.900805594 | 4.679567887 |
|        |              | He   | 1.008417944  | -3.928320067 | 6.656616821 |
|        |              | He   | 3.660058186  | -1.716106145 | 3.824269739 |
|        |              | He   | 2.281995463  | 3.299394207  | 2.616805095 |
|        |              | He   | -0.926177821 | 1.471707418  | 5.172121097 |
|        |              | He   | 2.923687653  | 2.808515142  | 5.188416888 |
|        |              | He   | 2.636837666  | -3.051120395 | 8.878513608 |
|        |              | He   | 1.277961314  | 0.891591662  | 3.647201199 |
|        |              | He   | 3.735278664  | 1.794180161  | 0.661977246 |
|        |              | He   | 0.945387561  | -1.433929747 | 5.254269019 |
|        |              | He   | -3.195896814 | -2.355711869 | 8.996519031 |
|        |              | He   | 1.800004986  | 3.539440232  | 9.618246135 |
|        |              | He   | -2.832210956 | -2.887956971 | 2.855864969 |
|        |              | He   | 0.01859122   | -3.982317747 | 9.25314156  |
|        |              | He   | -3.945553452 | -0.830947834 | 1.296036999 |
|        |              | He   | -3.340282931 | -2.334095122 | 5.474763445 |
|        |              | He   | -3.565180468 | 1.849398862  | 2.045554787 |

**He**

| Length | Cluster size | Atom | x            | y            | z           |
|--------|--------------|------|--------------|--------------|-------------|
|        |              | He   | 2.23752595   | -4.206697472 | 8.873230297 |
|        |              | He   | -0.974342019 | 4.697844301  | 2.377989478 |
|        |              | He   | -4.764246926 | 0.905998417  | 8.09161911  |
|        |              | He   | -2.790893951 | -3.901649086 | 2.638887264 |
|        |              | He   | 4.573299586  | 1.529955779  | 5.440119901 |
|        |              | He   | 3.816179151  | 3.00359926   | 7.55626812  |
|        |              | He   | -1.221440062 | 4.647430868  | 7.140332472 |
|        |              | He   | -4.510898021 | -1.636397484 | 3.005987561 |
|        |              | He   | -3.6661692   | -3.136750217 | 5.14201159  |
|        |              | He   | 4.095448405  | 2.464410807  | 2.920045295 |
|        |              | He   | -4.249299703 | 2.257378267  | 5.758859015 |
|        |              | He   | -2.46996401  | 4.124639567  | 4.719809152 |
|        |              | He   | 4.667316143  | -1.322465817 | 5.893501572 |
|        |              | He   | 3.835077385  | -2.889107817 | 3.859914389 |
|        |              | He   | -4.799331156 | -0.483645801 | 5.48868765  |
|        |              | He   | -0.108428754 | -4.782857471 | 2.218959624 |
|        |              | He   | 4.365170279  | -1.893789662 | 1.312248689 |
|        |              | He   | 4.260423711  | -2.225648898 | 8.546449746 |
|        |              | He   | -0.745447993 | -2.179939347 | 8.101536764 |
|        |              | He   | -2.31532114  | -4.252767783 | 7.172561177 |
|        |              | He   | 0.549450201  | -2.45247868  | 5.61095114  |
|        |              | He   | -1.208648935 | -4.639638778 | 4.728087376 |
|        |              | He   | 0.835917433  | 2.216427163  | 3.824218005 |
|        |              | He   | 2.193228253  | -0.91180945  | 7.318154235 |
| 10     | 50           | He   | 2.592597338  | -4.038458133 | 1.736646649 |
|        |              | He   | 4.838014619  | -0.229891452 | 3.362067046 |
|        |              | He   | -4.696330192 | 1.128470993  | 3.248396775 |
|        |              | He   | 2.420901198  | -0.241504642 | 4.571872007 |
|        |              | He   | -0.194904482 | 0.16490355   | 5.53852701  |
|        |              | He   | 2.939861924  | 3.833220711  | 5.028250938 |
|        |              | He   | -4.326161606 | -2.151051655 | 7.567582521 |
|        |              | He   | 0.991211292  | -2.118210507 | 2.892723707 |
|        |              | He   | 1.617945942  | -4.559277974 | 4.302810027 |
|        |              | He   | 2.434978441  | 4.105680331  | 9.688590436 |
|        |              | He   | 1.516167334  | 4.587645008  | 7.210942123 |
|        |              | He   | 1.664132979  | 1.850246651  | 6.542038124 |
|        |              | He   | 0.254828924  | 4.807997951  | 4.802614398 |
|        |              | He   | -3.451797968 | 3.350422746  | 2.201369206 |
|        |              | He   | 4.348741936  | 2.004234181  | 10          |
|        |              | He   | -2.101105516 | 1.486463658  | 4.010908747 |
|        |              | He   | -3.186152165 | -3.562332996 | 9.646018385 |
|        |              | He   | 4.791178264  | 0.395470324  | 7.927731888 |
|        |              | He   | -4.668566262 | -1.068879687 | 10          |
|        |              | He   | 3.151080126  | -3.653689967 | 6.381482019 |
|        |              | He   | 1.914905727  | 4.414337786  | 2.559223088 |
|        |              | He   | 0.49863847   | -4.835206564 | 6.83171303  |
|        |              | He   | -2.513208544 | -0.117276009 | 6.938951314 |
|        |              | He   | -1.757581569 | -1.584593228 | 3.967524571 |
|        |              | He   | -0.578924884 | -4.748406777 | 9.310855785 |
|        |              | He   | -3.413013849 | 3.375814065  | 8.203345689 |



**He**

| Length | Cluster size | Atom | x            | y            | z           |
|--------|--------------|------|--------------|--------------|-------------|
| 20     | 10           | He   | 0.253456849  | -0.21488288  | 20          |
|        |              | He   | -0.274296209 | 0.232550391  | 17.71462302 |
|        |              | He   | 0.307791429  | -0.260947925 | 15.48714403 |
|        |              | He   | 0.274298145  | -0.232547867 | 2.285377452 |
|        |              | He   | -0.307794452 | 0.260944114  | 4.512856912 |
|        |              | He   | -0.320956517 | 0.272107425  | 8.904806993 |
|        |              | He   | 0.32095601   | -0.272108593 | 11.09519548 |
|        |              | He   | -0.318341862 | 0.26989274   | 13.28717131 |
|        |              | He   | 0.318344812  | -0.269889233 | 6.712830488 |
|        |              | He   | -0.253456792 | 0.214879889  | 0           |

**He**

| Length | Cluster size | Atom        | x            | y            | z           |
|--------|--------------|-------------|--------------|--------------|-------------|
| 20     | 20           | He          | -1.462744058 | 0.027604812  | 6.568338489 |
|        |              | He          | 1.47188119   | 0.056756457  | 16.42729618 |
|        |              | He          | -0.032110271 | 1.472995973  | 11.49395474 |
|        |              | He          | 0.086394869  | -1.46480894  | 14.7343005  |
|        |              | He          | -0.837002981 | -1.20999135  | 10.73944886 |
|        |              | He          | 1.221293927  | -0.822926915 | 5.830059984 |
|        |              | He          | 0.040073807  | -1.459683748 | 8.184055199 |
|        |              | He          | -1.194905027 | 0.835578298  | 15.6450599  |
|        |              | He          | -1.136884951 | 0.819500945  | 2.495338376 |
|        |              | He          | -1.189589731 | 0.863788388  | 9.141218489 |
|        |              | He          | 1.205983406  | -0.851823868 | 12.36627537 |
|        |              | He          | -0.107361301 | 1.402199625  | 18.10050704 |
|        |              | He          | 0.881686132  | 1.174185315  | 14.03013016 |
|        |              | He          | 1.467846816  | 0.061142014  | 9.831389774 |
|        |              | He          | -0.868665211 | -1.188066439 | 4.229202002 |
|        |              | He          | -1.463949879 | -0.063066246 | 13.09913845 |
|        |              | He          | 1.396102637  | -0.226004057 | 3.090771    |
|        |              | He          | 0.064534714  | 1.44308415   | 4.867230219 |
| He     | 0.843043163  | 1.211572176 | 7.48370199   |              |             |
| He     | -0.751653195 | -1.20696205 | 17.33377455  |              |             |

**He**

| Length | Cluster size | Atom | x            | y            | z           |
|--------|--------------|------|--------------|--------------|-------------|
|        |              | He   | -1.663023306 | 0.009006822  | 1.973399077 |
|        |              | He   | 1.528353557  | 0.754194995  | 14.69150229 |
|        |              | He   | 1.706212846  | -0.238683358 | 17.13331987 |
|        |              | He   | 0.982032162  | 1.411815116  | 5.325626433 |
|        |              | He   | 1.255392317  | -1.180461651 | 5.96403761  |
|        |              | He   | -0.891582875 | 1.452231436  | 7.175807474 |
|        |              | He   | 1.709929458  | -0.264689822 | 10.33191341 |
|        |              | He   | 0.486725603  | -1.66007896  | 15.32565424 |
|        |              | He   | -1.685714599 | -0.319466239 | 16.09624175 |
|        |              | He   | 1.489288237  | 0.778363224  | 0.798800982 |
|        |              | He   | 1.590469835  | 0.672327739  | 7.811990925 |
|        |              | He   | 1.029759587  | 1.198591099  | 19.23930436 |
|        |              | He   | 0.107162381  | 1.724942757  | 2.825743583 |
|        |              | He   | 0.450225983  | -1.583143963 | 1.532115614 |
| 20     | 30           | He   | -1.30999488  | -1.126965055 | 13.52002973 |
|        |              | He   | -0.332455511 | -1.667215661 | 17.95500704 |
|        |              | He   | 0.905494075  | 1.441403667  | 12.19733186 |
|        |              | He   | -1.309074145 | -1.088628245 | 6.593784961 |
|        |              | He   | 0.03283373   | 1.702099689  | 9.681189152 |
|        |              | He   | -1.682716217 | -0.227228081 | 9.115957065 |
|        |              | He   | -1.586646642 | 0.526655802  | 18.70207622 |
|        |              | He   | -0.553422926 | -1.594182873 | 4.031972415 |
|        |              | He   | 1.708233855  | -0.28655449  | 3.460903755 |
|        |              | He   | -1.529210766 | 0.752463215  | 4.64678012  |
|        |              | He   | 1.305777666  | -1.123657458 | 12.84114104 |
|        |              | He   | -1.546749782 | 0.704148189  | 11.62511777 |
|        |              | He   | -0.961091647 | 1.404561872  | 14.17980082 |
|        |              | He   | -0.481717586 | -1.656558388 | 11.00893066 |
|        |              | He   | -0.061672766 | 1.682815525  | 16.73204771 |
|        |              | He   | 0.465586076  | -1.657339956 | 8.491692087 |

**He**

| Length | Cluster size | Atom | x            | y            | z           |
|--------|--------------|------|--------------|--------------|-------------|
|        |              | He   | -2.224875427 | 0.967433297  | 12.48389137 |
|        |              | He   | 1.229306614  | -2.107396741 | 12.47738231 |
|        |              | He   | 2.398190234  | 0.494157766  | 12.47582408 |
|        |              | He   | -0.419150266 | -2.405435494 | 14.94718407 |
|        |              | He   | 1.530540281  | 1.86887689   | 10.15555829 |
|        |              | He   | -1.605442849 | -1.820625821 | 12.48575647 |
|        |              | He   | -0.031328674 | -0.056397905 | 16.27119864 |
|        |              | He   | -0.004103412 | 0.00386421   | 8.923952513 |
|        |              | He   | -1.697320938 | -1.722627939 | 17.60397319 |
|        |              | He   | 2.235910591  | -0.921464936 | 10.12979868 |
|        |              | He   | 2.423110433  | 0.301194752  | 17.3072517  |
|        |              | He   | 2.251813101  | 0.913476307  | 2.917131348 |
|        |              | He   | -2.318180172 | 0.641753256  | 2.820484861 |
|        |              | He   | -1.512090523 | 1.90918852   | 5.36076449  |
|        |              | He   | 1.527572443  | 1.763631984  | 19.50553214 |
|        |              | He   | -0.000790699 | -0.003996355 | 13.5852144  |
|        |              | He   | 0.263836412  | 2.425977958  | 12.492099   |
|        |              | He   | -2.293271234 | 0.769077842  | 7.697029736 |
|        |              | He   | 1.095324979  | -2.17346808  | 17.52495676 |
| 20     | 40           | He   | -1.326749816 | 2.038754898  | 10.15587443 |
|        |              | He   | -2.305131279 | -0.816042007 | 5.332236647 |
|        |              | He   | 2.324830137  | 0.748000612  | 7.720256642 |
|        |              | He   | -0.190361824 | -2.428641227 | 10.11881763 |
|        |              | He   | -2.124843009 | 1.11890598   | 17.52548349 |
|        |              | He   | 1.579679971  | -1.826498923 | 2.92656787  |
|        |              | He   | 0.373137245  | 2.414264641  | 17.16878723 |
|        |              | He   | -2.411958678 | -0.420083524 | 14.9737383  |
|        |              | He   | 0.02501237   | 2.434280896  | 7.711487966 |
|        |              | He   | -2.365910649 | -0.610596748 | 10.13385094 |
|        |              | He   | 1.347698028  | 2.007002185  | 5.378677662 |
|        |              | He   | 1.711614041  | 1.70008515   | 14.88997616 |
|        |              | He   | -1.293887778 | -2.013996773 | 2.876939729 |
|        |              | He   | -0.010399818 | 0.01061989   | 4.173824656 |
|        |              | He   | -1.213347468 | 2.108213536  | 14.92196853 |
|        |              | He   | 0.043426053  | -2.43480204  | 5.331909373 |
|        |              | He   | -1.424313377 | -1.949868386 | 7.684369407 |
|        |              | He   | 1.431143435  | -1.963758725 | 7.702371817 |
|        |              | He   | -0.128193481 | 2.417761904  | 2.889343067 |
|        |              | He   | 2.316943106  | -0.686430203 | 5.368127042 |
|        |              | He   | 2.126459922  | -1.15739979  | 14.91869646 |

**He**

| Length | Cluster size | Atom | x            | y            | z           |
|--------|--------------|------|--------------|--------------|-------------|
|        |              | He   | -2.705422983 | 0.406858538  | 13.68446678 |
|        |              | He   | -0.00812385  | 0.010684657  | 11.6057989  |
|        |              | He   | 2.678923356  | 0.648066991  | 14.50829272 |
|        |              | He   | -1.454476715 | 2.347579543  | 12.1833882  |
|        |              | He   | -0.333171519 | -2.714470855 | 16.96260408 |
|        |              | He   | 2.042277018  | -1.794798243 | 15.64715266 |
|        |              | He   | 2.396198804  | -1.322295335 | 10.12874514 |
|        |              | He   | 2.721544853  | 0.4390645    | 17.21470209 |
|        |              | He   | -1.619099018 | 2.228447225  | 9.452937089 |
|        |              | He   | -1.539400507 | -2.273286894 | 4.300516658 |
|        |              | He   | 0.577099542  | -2.680486952 | 8.517248787 |
|        |              | He   | 2.50183523   | -1.12371873  | 7.409828191 |
|        |              | He   | -1.810897728 | 2.061960295  | 6.687945211 |
|        |              | He   | -1.221081281 | 2.459528974  | 17.61640626 |
|        |              | He   | 0.019355235  | -0.01372561  | 3.351392696 |
|        |              | He   | 0.01619433   | 0.015846525  | 17.10648265 |
|        |              | He   | 2.594494385  | -0.820274425 | 2.059711581 |
|        |              | He   | 0.823013173  | 2.59922308   | 10.56639105 |
|        |              | He   | 1.029627345  | 2.519789476  | 13.28492324 |
|        |              | He   | -0.011925248 | 0.002083432  | 8.865203219 |
|        |              | He   | -2.660884866 | -0.499894866 | 2.508650785 |
|        |              | He   | -2.725317473 | 0.237324674  | 10.93746412 |
|        |              | He   | -2.698427357 | 0.421035563  | 16.5709932  |
|        |              | He   | 1.296692888  | 2.315323408  | 18.66819159 |
| 20     | 50           | He   | 2.571252073  | -0.951701848 | 4.727891831 |
|        |              | He   | -2.738784428 | -0.183752116 | 5.450203674 |
|        |              | He   | -1.337744313 | 2.411505177  | 14.9065468  |
|        |              | He   | -2.109737797 | -1.77358237  | 15.1842667  |
|        |              | He   | 2.246552514  | -1.5482432   | 12.88379955 |
|        |              | He   | -1.667681562 | -2.187073826 | 7.044052825 |
|        |              | He   | 0.113942339  | -2.742249132 | 14.04856907 |
|        |              | He   | 2.599203755  | 0.894549076  | 11.77271415 |
|        |              | He   | 2.264233148  | 1.541053194  | 3.603420337 |
|        |              | He   | 1.871522779  | -1.916639061 | 18.36841922 |
|        |              | He   | -0.009301271 | -0.006563069 | 6.118238796 |
|        |              | He   | -1.960296076 | -1.932660191 | 12.45995311 |
|        |              | He   | 0.036590151  | 2.718013431  | 2.324406765 |
|        |              | He   | 0.564378119  | 2.672595502  | 7.817839277 |
|        |              | He   | -1.814690997 | -2.071968562 | 9.754328192 |
|        |              | He   | 2.4914783    | 1.142975552  | 9.019522526 |
|        |              | He   | 0.728524073  | -2.647311614 | 5.749665137 |
|        |              | He   | 0.71992985   | -2.649464267 | 2.892440747 |
|        |              | He   | 2.130472217  | 1.594884802  | 0.893734205 |
|        |              | He   | 1.18338385   | 2.442238107  | 15.97009315 |
|        |              | He   | 2.373402983  | 1.36628162   | 6.293306135 |
|        |              | He   | 0.002126914  | 0.013076803  | 14.34567075 |
|        |              | He   | 0.374965967  | -2.71358731  | 11.27052478 |
|        |              | He   | -2.737598198 | 0.04093537   | 8.206488005 |
|        |              | He   | -2.02965478  | 1.831148828  | 3.865312259 |
|        |              | He   | 0.286108024  | 2.723053578  | 5.06297672  |

**He**

| Length | Cluster size | Atom | x            | y            | z           |
|--------|--------------|------|--------------|--------------|-------------|
| 30     | 10           | He   | 0.014080323  | -0.013396463 | 5.965226538 |
|        |              | He   | 0.012189711  | 0.015043917  | 24.67820878 |
|        |              | He   | -0.014630728 | 0.012204379  | 22.00323001 |
|        |              | He   | 0.015348975  | 0.002806506  | 3.275416733 |
|        |              | He   | -0.012918238 | -0.014024738 | 8.640229    |
|        |              | He   | 0.012638367  | 0.014243989  | 13.98558703 |
|        |              | He   | -0.014098802 | 0.012790651  | 11.31314125 |
|        |              | He   | 0.015139031  | -0.002375653 | 27.36795385 |
|        |              | He   | -0.012308752 | -0.014515721 | 19.33034457 |
|        |              | He   | 0.014375574  | -0.01247671  | 16.65792312 |

**He**

| Length | Cluster size | Atom | x            | y            | z           |
|--------|--------------|------|--------------|--------------|-------------|
| 30     | 20           | He   | -0.63007974  | 0.910166362  | 6.949180256 |
|        |              | He   | 0.942089154  | 0.632116789  | 18.3221677  |
|        |              | He   | 0.689154139  | -0.900895776 | 14.56105674 |
|        |              | He   | 1.010750863  | -0.500896971 | 20.84598419 |
|        |              | He   | -1.130622142 | -0.061081555 | 19.57838635 |
|        |              | He   | -0.864193343 | -0.733701988 | 10.79744965 |
|        |              | He   | -0.658812424 | 0.906841446  | 22.12724232 |
|        |              | He   | 1.121175439  | 0.174460691  | 12.05192943 |
|        |              | He   | 0.186882335  | -1.106869323 | 8.260571408 |
|        |              | He   | -0.856472195 | 0.580268556  | 4.154401893 |
|        |              | He   | -0.135632102 | 1.126679594  | 15.81596451 |
|        |              | He   | -0.284982516 | -0.990122146 | 26.24630795 |
|        |              | He   | 0.638938632  | -0.713880806 | 2.401153452 |
|        |              | He   | -0.469061946 | -1.03364239  | 17.06822333 |
|        |              | He   | 0.160174578  | 1.077717037  | 24.79701848 |
|        |              | He   | 0.207911582  | -1.087803903 | 23.44105949 |
|        |              | He   | 0.857554854  | -0.669995669 | 5.59145428  |
|        |              | He   | 0.366201496  | 1.069362824  | 9.535537578 |
|        |              | He   | -1.050338215 | 0.428719784  | 13.30617651 |
|        |              | He   | 0.168830482  | 0.938965844  | 28.00748462 |

**He**

| Length | Cluster size | Atom | x            | y            | z           |
|--------|--------------|------|--------------|--------------|-------------|
|        |              | He   | -0.986630653 | 0.946055945  | 20.89176475 |
|        |              | He   | -0.303950834 | -1.325727541 | 11.99615239 |
|        |              | He   | -1.139605692 | 0.756357328  | 4.049807202 |
|        |              | He   | 1.358583798  | 0.108266975  | 20.01084291 |
|        |              | He   | 0.309910693  | -1.332716239 | 4.786533177 |
|        |              | He   | 1.051193502  | 0.878989195  | 22.67266133 |
|        |              | He   | 0.593394686  | 1.231867866  | 15.55548694 |
|        |              | He   | -1.204356211 | -0.670328247 | 26.20170836 |
|        |              | He   | -1.358893733 | -0.110815873 | 6.640895392 |
|        |              | He   | 1.35360749   | -0.193506915 | 10.20995884 |
|        |              | He   | 0.353408127  | 1.322016147  | 25.40239035 |
|        |              | He   | 0.798585695  | -1.101540936 | 24.45291422 |
|        |              | He   | -1.348216462 | 0.229086884  | 23.57375298 |
|        |              | He   | 1.174402378  | -0.718100276 | 17.336742   |
| 30     | 30           | He   | 1.21071287   | 0.646977914  | 12.88884196 |
|        |              | He   | -1.306572491 | -0.381942613 | 16.44708446 |
|        |              | He   | -0.241571387 | 1.348305641  | 18.22718397 |
|        |              | He   | -0.864454258 | -1.064097887 | 19.11260485 |
|        |              | He   | -0.032624292 | -1.374666401 | 21.79539082 |
|        |              | He   | -0.752511994 | 1.145549419  | 11.10717187 |
|        |              | He   | 1.228968211  | 0.54859948   | 2.921395553 |
|        |              | He   | 0.030254325  | 1.363464393  | 8.423441606 |
|        |              | He   | 0.485406259  | -1.280481202 | 14.66524241 |
|        |              | He   | -0.754858271 | -1.058257102 | 2.127506101 |
|        |              | He   | 0.871897101  | 1.059698557  | 5.778305442 |
|        |              | He   | 1.21664429   | -0.578474476 | 27.21382442 |

**He**

| Length | Cluster size | Atom | x            | y            | z           |
|--------|--------------|------|--------------|--------------|-------------|
|        |              | He   | 1.659824888  | -0.175336151 | 19.28950325 |
|        |              | He   | 0.043574672  | -1.668586377 | 12.53526482 |
|        |              | He   | 0.154628565  | 1.664545735  | 23.43681625 |
|        |              | He   | 1.678100289  | 0.013125267  | 13.90516324 |
|        |              | He   | -1.632028037 | -0.337679642 | 3.030512204 |
|        |              | He   | 0.003665779  | 1.661783156  | 9.780241126 |
|        |              | He   | 1.643890746  | -0.19967493  | 27.51302353 |
|        |              | He   | -1.665151154 | 0.184622216  | 24.80550689 |
|        |              | He   | -0.320671568 | -1.607357346 | 28.80954761 |
|        |              | He   | -0.184936035 | -1.647825492 | 20.66431334 |
|        |              | He   | -0.031734171 | 1.662403147  | 12.53744215 |
|        |              | He   | 0.012842906  | 1.68416696   | 15.24521627 |
|        |              | He   | 0.018459863  | -1.663394736 | 9.769185628 |
|        |              | He   | 1.691545079  | 0.141370145  | 5.674956765 |
|        |              | He   | -0.035888569 | 1.689055135  | 7.058952049 |
|        |              | He   | -0.156332223 | 1.671834586  | 4.364212319 |
|        |              | He   | 0.176688416  | 1.655036165  | 20.66343038 |
|        |              | He   | 1.633824551  | 0.086699351  | 2.896249541 |
|        |              | He   | 0.061153692  | -1.679994463 | 7.047138533 |
| 30     | 40           | He   | -1.656041719 | -0.029802982 | 11.1557903  |
|        |              | He   | -0.167047522 | -1.675926614 | 17.94213085 |
|        |              | He   | -0.152136335 | -1.656306126 | 23.41505399 |
|        |              | He   | -0.193009947 | -1.671900682 | 26.11740568 |
|        |              | He   | -1.693327543 | 0.085860781  | 16.58943144 |
|        |              | He   | 0.219236304  | -1.683280374 | 4.36634575  |
|        |              | He   | -1.650906461 | 0.173132849  | 22.05592972 |
|        |              | He   | -1.616538835 | 0.376641217  | 27.51678744 |
|        |              | He   | 0.256976972  | 1.684624105  | 26.16689309 |
|        |              | He   | 1.651808199  | -0.151940022 | 22.04215792 |
|        |              | He   | -0.03098294  | -1.692179587 | 15.25359911 |
|        |              | He   | -1.678569725 | -0.037811173 | 13.8950163  |
|        |              | He   | -1.684148519 | -0.093283692 | 5.720171266 |
|        |              | He   | -1.664922487 | 0.191401909  | 19.29487634 |
|        |              | He   | 1.679808684  | 0.014080694  | 8.39227424  |
|        |              | He   | 1.661448082  | 0.018813539  | 11.15661496 |
|        |              | He   | 1.676234134  | -0.162329853 | 24.78416493 |
|        |              | He   | -1.670076645 | -0.00777432  | 8.412377371 |
|        |              | He   | 0.139870974  | 1.67905854   | 17.93059033 |
|        |              | He   | -0.36107266  | 1.570401355  | 1.668661389 |
|        |              | He   | 1.682941212  | -0.098063629 | 16.59446775 |

**He**

| Length | Cluster size | Atom | x            | y            | z           |
|--------|--------------|------|--------------|--------------|-------------|
|        |              | He   | -1.839956672 | 0.950817685  | 25.11674603 |
|        |              | He   | 0.268975353  | -2.06192363  | 13.05907749 |
|        |              | He   | -1.474631342 | 1.480514288  | 12.66023434 |
|        |              | He   | 1.980709418  | -0.329406989 | 2.492296642 |
|        |              | He   | -1.975832276 | 0.546036257  | 22.40408877 |
|        |              | He   | -2.046274314 | -0.208654901 | 16.92193625 |
|        |              | He   | 1.701222268  | 1.171583271  | 5.052783303 |
|        |              | He   | 0.466492925  | 1.96715959   | 7.578296308 |
|        |              | He   | 0.81341117   | -1.883890933 | 10.28356278 |
|        |              | He   | -1.768163085 | -1.040752462 | 5.018120572 |
|        |              | He   | -1.962544744 | 0.537405105  | 7.259075406 |
|        |              | He   | -1.793858083 | -1.037886167 | 11.65893221 |
|        |              | He   | 1.50565607   | 1.415490133  | 16.36870529 |
|        |              | He   | 0.512977435  | 2.007622534  | 26.17020816 |
|        |              | He   | 1.134778276  | 1.739795924  | 13.70625109 |
|        |              | He   | -0.665584493 | -1.937333879 | 18.52870768 |
|        |              | He   | -0.990747553 | 1.783515423  | 5.063948184 |
|        |              | He   | -0.23739     | -2.057848736 | 15.78396333 |
|        |              | He   | -1.058919579 | 1.784051323  | 15.30915774 |
|        |              | He   | -1.969416914 | -0.659408724 | 14.27335362 |
|        |              | He   | 1.726149066  | 1.098013244  | 19.08421652 |
|        |              | He   | -1.655510814 | 1.220833169  | 9.892858416 |
|        |              | He   | 0.844404456  | -1.89347283  | 25.63925727 |
|        |              | He   | 0.368352523  | -1.992463622 | 28.3565341  |
| 30     | 50           | He   | -0.999396359 | -1.784031638 | 21.3077053  |
|        |              | He   | 2.020834374  | 0.420430501  | 24.55498332 |
|        |              | He   | 0.060647546  | 2.05577959   | 23.47909508 |
|        |              | He   | -1.947110234 | 0.541244728  | 2.743824378 |
|        |              | He   | 2.063055166  | -0.198182466 | 12.06749806 |
|        |              | He   | 0.444459658  | 1.999875595  | 2.726061474 |
|        |              | He   | 0.980739571  | 1.783002133  | 28.85024333 |
|        |              | He   | -1.339847986 | -1.573378416 | 24.04541794 |
|        |              | He   | 1.94342524   | -0.724001206 | 14.73339273 |
|        |              | He   | 1.722808318  | -1.12546635  | 17.43816935 |
|        |              | He   | -2.03304773  | 0.177839803  | 19.64724882 |
|        |              | He   | 1.173562367  | -1.68098881  | 4.693448265 |
|        |              | He   | -0.225647404 | -2.084910796 | 6.96888812  |
|        |              | He   | -1.577588941 | 1.300059698  | 27.81521859 |
|        |              | He   | 1.884186395  | 0.79727921   | 21.83689633 |
|        |              | He   | 1.482964445  | -1.404465791 | 20.19196969 |
|        |              | He   | 2.065512058  | -0.084164573 | 27.23060807 |
|        |              | He   | 1.226134224  | -1.648922946 | 22.94389005 |
|        |              | He   | -1.667640187 | -1.247895775 | 26.75005725 |
|        |              | He   | -0.581014638 | -1.951126356 | 2.658294386 |
|        |              | He   | -0.663309412 | 1.941695556  | 17.99459503 |
|        |              | He   | 2.011638112  | 0.497792365  | 9.455017849 |
|        |              | He   | 0.603668464  | 2.00829534   | 11.06772981 |
|        |              | He   | 1.964986503  | -0.580016326 | 7.071966667 |
|        |              | He   | -0.316226175 | 2.016676322  | 20.73794922 |
|        |              | He   | -1.565497295 | -1.382376794 | 9.092399331 |



**He**

| Length | Cluster size | Atom | x            | y            | z           |
|--------|--------------|------|--------------|--------------|-------------|
| 50     | 10           | He   | 0.011294071  | -0.014479568 | 35.99348567 |
|        |              | He   | 0.012646287  | 0.013337572  | 18.27872493 |
|        |              | He   | 3.43999E-05  | -0.018382981 | 21.23121573 |
|        |              | He   | 0.018359116  | -0.000869871 | 27.13589786 |
|        |              | He   | 0.014133784  | -0.011737467 | 12.36859157 |
|        |              | He   | -0.012696782 | 0.013287793  | 24.1836082  |
|        |              | He   | -0.018348752 | -0.0009774   | 15.32586499 |
|        |              | He   | 0.001782476  | 0.018286555  | 33.04063607 |
|        |              | He   | -0.013896641 | -0.012024296 | 30.08820726 |
|        |              | He   | -0.018130897 | 0.002981073  | 38.95070891 |

**He**

| Length | Cluster size | Atom         | x            | y            | z           |
|--------|--------------|--------------|--------------|--------------|-------------|
| 50     | 20           | He           | 0.009433558  | 0.017118391  | 11.76891598 |
|        |              | He           | 0.019519081  | -0.001118296 | 14.29312515 |
|        |              | He           | -0.003075628 | 0.019295478  | 24.38967604 |
|        |              | He           | -0.001435998 | -0.019494256 | 31.96204498 |
|        |              | He           | -0.013116319 | -0.014493902 | 19.34141308 |
|        |              | He           | 0.007401072  | -0.018095244 | 16.81728096 |
|        |              | He           | -0.014280505 | 0.01334308   | 37.01033386 |
|        |              | He           | 0.019332633  | 0.002731191  | 42.05888123 |
|        |              | He           | 0.034037695  | -0.038196549 | 1.639741151 |
|        |              | He           | -0.018737876 | 0.005568293  | 21.86554933 |
|        |              | He           | 0.005871873  | 0.018645318  | 39.53453164 |
|        |              | He           | -0.012626653 | -0.01789022  | 47.11157751 |
|        |              | He           | 0.016092159  | 0.011110975  | 26.91379756 |
|        |              | He           | 0.016963934  | -0.009720469 | 29.43792373 |
|        |              | He           | -0.004397858 | -0.022228815 | 4.191754976 |
|        |              | He           | -0.047409706 | -0.001105409 | 49.66283951 |
|        |              | He           | -0.019158534 | -0.003574884 | 6.719632651 |
|        |              | He           | 0.010641958  | -0.016344732 | 44.58378573 |
| He     | -0.011368941 | 0.015861522  | 9.244555877  |              |             |
| He     | -0.018200914 | -0.007124636 | 34.4861826   |              |             |

**He**

| Length | Cluster size | Atom | x            | y            | z           |
|--------|--------------|------|--------------|--------------|-------------|
| 50     | 30           | He   | 0.938352537  | 0.234110383  | 18.01410373 |
|        |              | He   | -0.538722655 | -0.593732443 | 48.19684531 |
|        |              | He   | 0.850844186  | 0.474616125  | 33.57558625 |
|        |              | He   | 0.781700588  | -0.177283928 | 1.823877005 |
|        |              | He   | 0.952366633  | 0.1851662    | 21.10375862 |
|        |              | He   | 0.875500527  | 0.390244282  | 42.92692617 |
|        |              | He   | -0.810110381 | -0.530499271 | 35.14145978 |
|        |              | He   | 0.965623453  | 0.065079616  | 14.88266169 |
|        |              | He   | -0.830794985 | -0.481384198 | 41.37223637 |
|        |              | He   | -0.859695645 | -0.428947421 | 25.79432188 |
|        |              | He   | -0.860805379 | -0.435869976 | 32.01392724 |
|        |              | He   | 0.845059619  | 0.48198291   | 39.81221584 |
|        |              | He   | -0.946332405 | -0.15274046  | 13.33598755 |
|        |              | He   | 0.955538746  | 0.091316383  | 8.652568103 |
|        |              | He   | -0.809508962 | -0.540394379 | 28.91415676 |
|        |              | He   | 0.941323182  | 0.138648401  | 5.494505558 |
|        |              | He   | -0.894823154 | -0.374241206 | 22.68691847 |
|        |              | He   | 0.849417518  | 0.443164455  | 36.69003487 |
|        |              | He   | 0.869203032  | 0.435682255  | 27.34417719 |
|        |              | He   | 0.710330747  | 0.558521239  | 46.25055816 |
|        |              | He   | 0.835477077  | 0.485334341  | 24.25522552 |
|        |              | He   | -0.962193614 | -0.148650123 | 16.44902767 |
|        |              | He   | -0.939672258 | -0.189494131 | 7.097438962 |
|        |              | He   | 0.951010668  | 0.198507985  | 11.78399862 |
|        |              | He   | -0.944515947 | -0.172614251 | 19.55534199 |
|        |              | He   | -0.849668506 | -0.429058818 | 44.52836819 |
|        |              | He   | -0.967568617 | -0.098371185 | 10.21265903 |
|        |              | He   | 0.802621484  | 0.527621034  | 30.46827082 |
|        |              | He   | -0.886499493 | -0.396975485 | 38.24194953 |
|        |              | He   | -0.901948914 | 0.049080939  | 3.770844188 |

**He**

| Length | Cluster size | Atom | x            | y            | z           |
|--------|--------------|------|--------------|--------------|-------------|
|        |              | He   | -1.24067556  | 0.419769759  | 20.9965618  |
|        |              | He   | 1.274508726  | -0.322499701 | 33.8520902  |
|        |              | He   | -0.284783816 | -1.244209642 | 14.3441426  |
|        |              | He   | -1.295651676 | -0.251193356 | 42.34240784 |
|        |              | He   | -1.315083387 | -0.035401887 | 25.2428011  |
|        |              | He   | 0.502389339  | -1.168711091 | 45.17982133 |
|        |              | He   | 1.225257454  | -0.472279388 | 16.72306973 |
|        |              | He   | 0.189476077  | 1.264709311  | 23.33509193 |
|        |              | He   | -0.089342145 | -1.276784444 | 36.17842212 |
|        |              | He   | -0.87653238  | -0.915672375 | 5.289496411 |
|        |              | He   | -1.171340644 | 0.337919248  | 46.77704943 |
|        |              | He   | -0.134499591 | -1.270727525 | 31.46857632 |
|        |              | He   | -0.027539458 | -1.281132869 | 40.02874849 |
|        |              | He   | 0.287398573  | 1.239574807  | 10.0126369  |
|        |              | He   | 1.135627002  | -0.675448037 | 8.240360381 |
|        |              | He   | 0.135265918  | 1.272655874  | 31.90608891 |
|        |              | He   | -0.167272488 | -1.267000437 | 27.63236403 |
|        |              | He   | -1.193429021 | 0.561360117  | 12.47227528 |
|        |              | He   | -0.401923744 | -1.215850746 | 10.5372981  |
| 50     | 40           | He   | 1.307770187  | -0.092106215 | 12.36503353 |
|        |              | He   | -1.307148809 | 0.084805647  | 16.67908635 |
|        |              | He   | 1.283206961  | -0.271657779 | 42.46709536 |
|        |              | He   | -0.097023995 | 1.255611391  | 44.2796307  |
|        |              | He   | 1.310676082  | 0.083935451  | 29.52363466 |
|        |              | He   | 1.245919444  | -0.409777164 | 25.28578812 |
|        |              | He   | -1.259117202 | 0.38071178   | 29.57254142 |
|        |              | He   | -0.200690509 | -1.264700871 | 22.91944966 |
|        |              | He   | -1.306372233 | -0.101368413 | 33.81145156 |
|        |              | He   | -1.283066676 | 0.271880598  | 38.14030587 |
|        |              | He   | 1.220178557  | -0.038769612 | 3.68858731  |
|        |              | He   | 0.306629368  | 1.245341676  | 14.77570996 |
|        |              | He   | 1.304851444  | 0.145339183  | 38.08726165 |
|        |              | He   | 1.312599108  | -0.032586666 | 20.96624906 |
|        |              | He   | 0.098676899  | 1.276323749  | 35.76305903 |
|        |              | He   | 0.568584515  | 1.113966729  | 6.242217908 |
|        |              | He   | 0.053949094  | 1.27440439   | 40.49028447 |
|        |              | He   | 0.160591642  | 1.268323927  | 27.18299668 |
|        |              | He   | -0.233336899 | -1.26019212  | 19.03987508 |
|        |              | He   | 0.252244045  | 1.25494185   | 18.64823298 |
|        |              | He   | -1.30681642  | 0.127092913  | 7.999949309 |

**He**

| Length | Cluster size | Atom | x            | y            | z           |
|--------|--------------|------|--------------|--------------|-------------|
|        |              | He   | 1.347748186  | 0.168836849  | 44.86924971 |
|        |              | He   | 1.329888958  | -0.239867519 | 34.69081024 |
|        |              | He   | 1.223668305  | 0.598498608  | 37.46385232 |
|        |              | He   | 0.112244451  | 1.356164789  | 32.82781484 |
|        |              | He   | -1.25585992  | -0.275378932 | 48.8367361  |
|        |              | He   | -0.655322709 | 1.174069034  | 7.732742913 |
|        |              | He   | -0.905888071 | 1.020999404  | 17.98191226 |
|        |              | He   | -1.149417639 | -0.723405529 | 5.788944723 |
|        |              | He   | 1.254941352  | 0.529398352  | 9.604792389 |
|        |              | He   | -0.884522502 | -1.012374252 | 44.00781184 |
|        |              | He   | -1.304789748 | -0.400981709 | 41.18127793 |
|        |              | He   | -1.354783224 | -0.028308846 | 30.96803986 |
|        |              | He   | -0.235942487 | 1.347733122  | 43.01209854 |
|        |              | He   | -1.262279388 | 0.518588778  | 38.40275461 |
|        |              | He   | 0.664454149  | -1.177211043 | 21.68597006 |
|        |              | He   | 0.961055685  | -0.969514866 | 31.90873911 |
|        |              | He   | -0.422766115 | 1.287238513  | 25.40812862 |
|        |              | He   | 0.483990792  | -1.261848717 | 39.32424647 |
|        |              | He   | 1.134237179  | 0.760225582  | 19.82572767 |
|        |              | He   | 0.886580879  | 1.022279001  | 30.04880585 |
|        |              | He   | -1.199718877 | 0.650521035  | 10.55144309 |
|        |              | He   | 0.278441129  | 1.336288713  | 5.048767168 |
|        |              | He   | -1.110816969 | 0.785389781  | 28.18760991 |
|        |              | He   | 0.625771592  | 1.204083218  | 40.26355118 |
| 50     | 50           | He   | -1.24153689  | -0.556558273 | 23.54867848 |
|        |              | He   | -0.977729268 | 0.940869856  | 45.96010862 |
|        |              | He   | 0.019524904  | -1.364651642 | 46.68088252 |
|        |              | He   | -0.071556577 | 1.362207937  | 15.18060592 |
|        |              | He   | 0.366400308  | -1.308220634 | 11.47017948 |
|        |              | He   | 1.289487098  | -0.431809723 | 6.858533304 |
|        |              | He   | -1.092345795 | -0.820302568 | 33.75163397 |
|        |              | He   | 1.053655236  | 0.805996911  | 47.88647973 |
|        |              | He   | 1.326352062  | 0.324152971  | 27.26699943 |
|        |              | He   | 1.349924782  | -0.030918229 | 17.04432401 |
|        |              | He   | 0.857052535  | -1.007119411 | 3.86101907  |
|        |              | He   | 1.083940584  | -0.825804783 | 14.27132694 |
|        |              | He   | -1.323186321 | 0.299313332  | 20.76587515 |
|        |              | He   | -0.152710412 | -1.352654587 | 18.90832622 |
|        |              | He   | -0.500160405 | -1.271493381 | 8.7158442   |
|        |              | He   | -0.340506133 | -1.320724649 | 36.55426923 |
|        |              | He   | -1.170803629 | 0.529529513  | 2.875778406 |
|        |              | He   | 1.123296787  | -0.76881037  | 42.13283645 |
|        |              | He   | -0.724232826 | 1.147508323  | 35.60867829 |
|        |              | He   | -1.339553929 | -0.253619652 | 13.33135293 |
|        |              | He   | 0.138941972  | -1.359037105 | 29.11006701 |
|        |              | He   | 0.72666719   | 1.138381947  | 12.40948017 |
|        |              | He   | -0.941242033 | -0.979521586 | 16.12443151 |
|        |              | He   | 0.406066678  | 1.303542912  | 22.62406953 |
|        |              | He   | -0.669955964 | -1.17590357  | 26.32630004 |
|        |              | He   | 1.236364828  | -0.580746526 | 24.46736285 |

Ne

| Length | Cluster size | Atom | x            | y            | z           |
|--------|--------------|------|--------------|--------------|-------------|
| 10     | 10           | Ne   | 1.382447732  | -0.780620274 | 8.438461807 |
|        |              | Ne   | -0.687544192 | -1.517358264 | 6.590231467 |
|        |              | Ne   | 0.730269543  | 1.48949018   | 3.441886732 |
|        |              | Ne   | 1.467741681  | -0.804878232 | 4.904799309 |
|        |              | Ne   | 0.870293365  | 1.401238206  | 6.613925063 |
|        |              | Ne   | -1.416845798 | 0.715946701  | 8.26154076  |
|        |              | Ne   | 1.413666744  | -0.733929122 | 1.726279058 |
|        |              | Ne   | -0.859235066 | -1.413227557 | 3.397906112 |
|        |              | Ne   | -1.466496169 | 0.781519588  | 5.113140219 |
|        |              | Ne   | -1.371100091 | 0.793109473  | 1.617410227 |

Ne

| Length | Cluster size | Atom | x            | y            | z           |
|--------|--------------|------|--------------|--------------|-------------|
| 10     | 20           | Ne   | -2.77780807  | 0.118261638  | 4.879113715 |
|        |              | Ne   | -0.054382234 | -0.084972768 | 6.428115958 |
|        |              | Ne   | 2.459201905  | 1.282850479  | 1.12712749  |
|        |              | Ne   | 0.811429528  | 2.687599217  | 6.678963446 |
|        |              | Ne   | -2.215814058 | -1.677534981 | 2.362494181 |
|        |              | Ne   | 2.32875265   | -1.534083099 | 8.154847726 |
|        |              | Ne   | 2.721624119  | -0.703367288 | 3.231817159 |
|        |              | Ne   | 1.795432025  | 2.140497972  | 3.955003808 |
|        |              | Ne   | -1.183654212 | 2.542745281  | 4.534510166 |
|        |              | Ne   | -2.618591108 | -1.0139671   | 7.583897434 |
|        |              | Ne   | 2.341405114  | 1.334012399  | 8.744395375 |
|        |              | Ne   | 0.595471788  | -2.718433197 | 2.572156035 |
|        |              | Ne   | -0.263535742 | -2.755623601 | 7.738349352 |
|        |              | Ne   | -2.527389414 | 1.207338242  | 2.103708563 |
|        |              | Ne   | -1.364835451 | -2.447209388 | 5.035485304 |
|        |              | Ne   | -2.028521804 | 1.886227199  | 7.3364735   |
|        |              | Ne   | 2.801534966  | 0.355701253  | 5.964574873 |
|        |              | Ne   | 1.553195819  | -2.311637877 | 5.369489501 |
|        |              | Ne   | -0.076036866 | 2.735407643  | 1.808993646 |
|        |              | Ne   | -0.106814345 | 0.000301325  | 3.476289267 |

Ne

| Length | Cluster size | Atom | x            | y            | z           |
|--------|--------------|------|--------------|--------------|-------------|
|        |              | Ne   | 0.037539248  | 1.531797011  | 4.821745602 |
|        |              | Ne   | -0.092122135 | -3.735533038 | 1.59430939  |
|        |              | Ne   | -2.595963723 | -2.695633931 | 9.824753701 |
|        |              | Ne   | 1.112608694  | 3.706601797  | 6.400754254 |
|        |              | Ne   | -2.228002127 | 3.081684275  | 3.332533125 |
|        |              | Ne   | 2.831519538  | -2.586058012 | 7.918422093 |
|        |              | Ne   | -3.474368128 | -1.665160823 | 4.886076357 |
|        |              | Ne   | 1.433090937  | -1.043956255 | 5.332768568 |
|        |              | Ne   | 3.152623798  | 2.174642117  | 4.992620896 |
|        |              | Ne   | -1.2629137   | -0.464612295 | 6.474373464 |
|        |              | Ne   | -2.028419173 | -3.249328747 | 7.024962596 |
|        |              | Ne   | 0.957121007  | 3.75180105   | 3.268007035 |
|        |              | Ne   | 0.82442442   | -3.779467544 | 6.171082515 |
|        |              | Ne   | 1.149539319  | 0.020113604  | 8.130733948 |
| 10     | 30           | Ne   | -1.781216729 | 3.436948273  | 6.222708014 |
|        |              | Ne   | -3.750923238 | 0.454350709  | 2.686528817 |
|        |              | Ne   | -0.902429316 | -0.809075027 | 3.341586185 |
|        |              | Ne   | 3.871408986  | -0.152102818 | 6.613415241 |
|        |              | Ne   | 3.786941439  | -0.20943869  | 9.606340224 |
|        |              | Ne   | 3.021577334  | 2.345401536  | 8.157951604 |
|        |              | Ne   | 0.224345137  | -3.788393769 | 9.053906904 |
|        |              | Ne   | -3.80153635  | -0.775921078 | 7.821238283 |
|        |              | Ne   | 3.795982182  | -0.475022318 | 3.592398587 |
|        |              | Ne   | 3.166718172  | 2.090499402  | 2.05908153  |
|        |              | Ne   | -3.148050243 | 2.097372961  | 8.490907112 |
|        |              | Ne   | 2.172722034  | -3.179924575 | 3.503093564 |
|        |              | Ne   | -1.301496311 | -3.602361269 | 4.219035056 |
|        |              | Ne   | -3.596974454 | 1.24914905   | 5.540326894 |
|        |              | Ne   | -0.485439654 | 3.769005635  | 8.91834679  |
|        |              | Ne   | -2.968041995 | -2.43591332  | 2.01844435  |

Ne

| Length | Cluster size | Atom | x            | y            | z           |
|--------|--------------|------|--------------|--------------|-------------|
|        |              | Ne   | -4.382732734 | -0.41526173  | 8.217700155 |
|        |              | Ne   | 3.245077763  | -3.075481947 | 4.319217592 |
|        |              | Ne   | 3.204632811  | 3.096231324  | 8.625134443 |
|        |              | Ne   | 4.38947172   | 0.400111136  | 7.921118762 |
|        |              | Ne   | 1.095787619  | 1.382947829  | 7.561215953 |
|        |              | Ne   | 1.460785972  | 1.556797158  | 1.555484537 |
|        |              | Ne   | -2.508795187 | 3.598377649  | 1.793499469 |
|        |              | Ne   | -1.282752309 | 1.20447238   | 3.018940089 |
|        |              | Ne   | -3.268678071 | -3.023017117 | 9.050638314 |
|        |              | Ne   | 2.323936598  | 3.812703919  | 3.408506876 |
|        |              | Ne   | 1.426497349  | -4.189353038 | 6.376803262 |
|        |              | Ne   | -4.407088238 | 0.382863878  | 5.357989214 |
|        |              | Ne   | -4.42008824  | -1.141391825 | 0.493475212 |
|        |              | Ne   | 3.741613072  | -2.413926944 | 7.215771953 |
|        |              | Ne   | 1.303558507  | -1.21917956  | 2.912892453 |
|        |              | Ne   | 0.686281376  | -4.339911525 | 3.461933476 |
|        |              | Ne   | -1.315869649 | -1.47518673  | 4.429372147 |
|        |              | Ne   | -1.480368571 | 4.154222176  | 6.796488158 |
|        |              | Ne   | 0.535254424  | 4.330849941  | 8.97238646  |
| 10     | 40           | Ne   | -3.764148162 | 2.363238721  | 7.467667554 |
|        |              | Ne   | -4.244965451 | 1.189406662  | 2.47715466  |
|        |              | Ne   | 2.155423489  | -3.835342814 | 9.26935321  |
|        |              | Ne   | -2.319887136 | 3.730839615  | 9.620981094 |
|        |              | Ne   | -1.473694098 | 1.113365923  | 6.036582821 |
|        |              | Ne   | 4.2304983    | -1.316536992 | 2.103469095 |
|        |              | Ne   | -2.15943389  | -3.856711657 | 2.653530192 |
|        |              | Ne   | 3.754512701  | 2.366255813  | 5.761159538 |
|        |              | Ne   | 1.462727099  | 4.188551695  | 6.199694361 |
|        |              | Ne   | -0.588854099 | 4.349030443  | 4.014410299 |
|        |              | Ne   | 4.147202955  | 1.542849276  | 2.919969154 |
|        |              | Ne   | 1.39264255   | -1.221144928 | 5.922669996 |
|        |              | Ne   | 1.221324285  | 1.404887552  | 4.581423091 |
|        |              | Ne   | -0.702993047 | -4.38290628  | 8.443917035 |
|        |              | Ne   | 4.370895969  | -0.462293542 | 5.053907991 |
|        |              | Ne   | 0.374918765  | 4.381195749  | 1.249520021 |
|        |              | Ne   | -3.702123113 | -2.433685034 | 6.148515537 |
|        |              | Ne   | -4.101341327 | -1.728188214 | 3.338919244 |
|        |              | Ne   | -1.439972276 | -4.196709821 | 5.597065876 |
|        |              | Ne   | -1.160053515 | -1.552663294 | 7.474510297 |
|        |              | Ne   | -3.233407021 | 3.063505648  | 4.616895955 |

Ne

| Length | Cluster size | Atom | x            | y            | z           |
|--------|--------------|------|--------------|--------------|-------------|
|        |              | Ne   | 3.847783951  | -3.533622258 | 7.831241021 |
|        |              | Ne   | -3.072896655 | -0.513910262 | 8.954564623 |
|        |              | Ne   | 0.894259821  | 5.065436849  | 1.471113059 |
|        |              | Ne   | -0.958308633 | -2.533536069 | 1.954853136 |
|        |              | Ne   | 0.223324317  | -2.652063884 | 7.072606147 |
|        |              | Ne   | -2.948856618 | 4.426158109  | 3.041984234 |
|        |              | Ne   | 2.013257097  | 2.066067687  | 6.151329781 |
|        |              | Ne   | 2.312241538  | -4.729781428 | 5.541685177 |
|        |              | Ne   | -1.393516726 | 2.465274317  | 1.47346403  |
|        |              | Ne   | -3.930714921 | 3.415748777  | 8.230415555 |
|        |              | Ne   | 0.525693365  | -5.205330172 | 2.963852234 |
|        |              | Ne   | 2.653840135  | -0.944321521 | 6.50625285  |
|        |              | Ne   | -4.50639918  | -2.696161647 | 3.949013383 |
|        |              | Ne   | -1.491982407 | 2.435076014  | 4.508412551 |
|        |              | Ne   | -5.139362682 | -0.809801575 | 1.738158514 |
|        |              | Ne   | 5.080569301  | 1.268427858  | 2.195654108 |
|        |              | Ne   | 2.429004756  | 4.689800271  | 4.77014116  |
|        |              | Ne   | -1.497758819 | 4.947693808  | 9.015537866 |
|        |              | Ne   | 4.883863163  | 1.91573338   | 7.443998208 |
|        |              | Ne   | 3.13295202   | 4.239899598  | 7.79370296  |
|        |              | Ne   | 1.138890344  | 2.546515015  | 3.217517597 |
|        |              | Ne   | -4.723575391 | 2.141790505  | 2.36514935  |
|        |              | Ne   | -0.875952388 | 2.399734342  | 7.41724565  |
|        |              | Ne   | 0.501507825  | 5.225293056  | 6.894206836 |
| 10     | 50           | Ne   | -0.332076742 | 5.240912365  | 4.070080855 |
|        |              | Ne   | 2.765715267  | 0.108850942  | 3.668711815 |
|        |              | Ne   | -5.2793403   | 0.128840887  | 4.557591132 |
|        |              | Ne   | -4.390808514 | 2.832827136  | 5.274168637 |
|        |              | Ne   | -2.578285378 | -0.006806835 | 3.073535861 |
|        |              | Ne   | 4.521794745  | 2.719674228  | 4.662633108 |
|        |              | Ne   | 3.571286868  | 3.844915101  | 2.065212018 |
|        |              | Ne   | -2.342240674 | -4.720386263 | 3.454749852 |
|        |              | Ne   | -2.7354169   | 0.277746931  | 6.102480821 |
|        |              | Ne   | 3.255766863  | -4.091659425 | 2.649214787 |
|        |              | Ne   | 1.41092493   | -5.054196624 | 8.358490814 |
|        |              | Ne   | 1.240874361  | -2.456250541 | 4.109981684 |
|        |              | Ne   | 4.466105851  | -2.827174239 | 5.06465629  |
|        |              | Ne   | -1.695205727 | -2.239937844 | 4.86241014  |
|        |              | Ne   | 0.104057298  | 0.07139612   | 5.161642855 |
|        |              | Ne   | -3.826907555 | -3.497031532 | 1.173326247 |
|        |              | Ne   | 4.973176097  | -1.632122415 | 2.438989149 |
|        |              | Ne   | -2.337663245 | 4.736714068  | 6.110094411 |
|        |              | Ne   | -1.505833547 | -4.981801088 | 8.543026486 |
|        |              | Ne   | 5.266901647  | -0.04055551  | 5.173844291 |
|        |              | Ne   | -4.889265767 | -1.852488233 | 6.734979409 |
|        |              | Ne   | -5.228265115 | 0.933225263  | 7.463705796 |
|        |              | Ne   | -3.947069415 | -3.387978692 | 9.102121789 |
|        |              | Ne   | 5.17715428   | -0.928513559 | 8.072488044 |
|        |              | Ne   | -0.524457858 | -5.247543338 | 5.744098854 |
|        |              | Ne   | -3.224690286 | -4.19800807  | 6.308154445 |



Ne

| Length | Cluster size | Atom | x            | y            | z           |
|--------|--------------|------|--------------|--------------|-------------|
| 20     | 10           | Ne   | -0.852512611 | 0.537493109  | 17.99168674 |
|        |              | Ne   | 0.871622585  | -0.750851649 | 12.84141696 |
|        |              | Ne   | 0.699237195  | -0.896470616 | 9.552872882 |
|        |              | Ne   | 0.838635224  | -0.789264773 | 6.414753434 |
|        |              | Ne   | 0.65021503   | -0.768173346 | 2.7624415   |
|        |              | Ne   | 0.751277841  | -0.811160101 | 16.02384731 |
|        |              | Ne   | -0.826380525 | 0.81310089   | 14.39560498 |
|        |              | Ne   | -0.803992079 | 0.782656289  | 11.21279023 |
|        |              | Ne   | -0.816923576 | 0.722490275  | 4.741559394 |
|        |              | Ne   | -0.755256526 | 0.879853337  | 7.969587619 |

Ne

| Length | Cluster size | Atom | x            | y            | z           |
|--------|--------------|------|--------------|--------------|-------------|
| 20     | 20           | Ne   | -1.201886743 | 1.169455878  | 6.022882239 |
|        |              | Ne   | -1.101919868 | 1.185883884  | 15.78686413 |
|        |              | Ne   | 1.15460729   | -1.231301953 | 12.56342671 |
|        |              | Ne   | 1.170864356  | -1.218286552 | 6.12128273  |
|        |              | Ne   | 1.132397442  | -1.073069078 | 2.445514008 |
|        |              | Ne   | -1.174621045 | -1.165064125 | 10.92201916 |
|        |              | Ne   | 1.095004711  | -1.183414391 | 15.76832705 |
|        |              | Ne   | -1.178114588 | 1.207312086  | 12.52241953 |
|        |              | Ne   | 1.186575435  | 1.102382957  | 4.436326001 |
|        |              | Ne   | -1.229830651 | -1.155310774 | 7.651543912 |
|        |              | Ne   | -1.241802595 | -1.1383735   | 14.10959257 |
|        |              | Ne   | 1.149108536  | -1.177647221 | 9.241512519 |
|        |              | Ne   | -1.139387345 | 1.19181393   | 9.281105468 |
|        |              | Ne   | -1.081474787 | 1.12860224   | 2.562526365 |
|        |              | Ne   | 1.151408252  | 1.056967109  | 17.67882759 |
|        |              | Ne   | 1.209559431  | 1.159632746  | 14.09487854 |
|        |              | Ne   | 1.179010944  | 1.193612585  | 7.61705188  |
|        |              | Ne   | 1.199899335  | 1.132431191  | 10.94411511 |
|        |              | Ne   | -1.096859051 | -1.189588755 | 4.380503488 |
|        |              | Ne   | -1.152591    | -1.060216111 | 17.68370867 |

Ne

| Length | Cluster size | Atom | x            | y            | z           |
|--------|--------------|------|--------------|--------------|-------------|
|        |              | Ne   | 0.350029145  | 2.49391996   | 4.046210003 |
|        |              | Ne   | -2.551360513 | -0.465539677 | 6.621286136 |
|        |              | Ne   | 2.540487738  | 0.395738208  | 9.267735757 |
|        |              | Ne   | 0.41329852   | 2.538911441  | 14.39594255 |
|        |              | Ne   | 1.190543584  | -2.265142284 | 3.906524107 |
|        |              | Ne   | 0.412197306  | 2.551323527  | 9.25534981  |
|        |              | Ne   | -1.824977706 | -1.802443475 | 14.53596803 |
|        |              | Ne   | 1.182780411  | -2.27747125  | 9.236523181 |
|        |              | Ne   | 1.190057485  | -2.297573991 | 14.46863745 |
|        |              | Ne   | -2.279736901 | 1.111077164  | 4.10465087  |
|        |              | Ne   | -2.319673336 | 1.14842828   | 9.215468772 |
|        |              | Ne   | -0.33764015  | -2.562766507 | 6.537507488 |
|        |              | Ne   | 0.0104251    | -0.007965434 | 7.909933127 |
|        |              | Ne   | -2.289931595 | 1.146232238  | 14.44329203 |
| 20     | 30           | Ne   | 1.81473445   | 1.81005762   | 6.581146681 |
|        |              | Ne   | -1.185524676 | 2.295375612  | 6.653687888 |
|        |              | Ne   | -0.401071362 | -2.538611157 | 11.80482754 |
|        |              | Ne   | -2.529396893 | -0.427601674 | 11.74544679 |
|        |              | Ne   | -0.005621091 | -0.006417034 | 13.09969387 |
|        |              | Ne   | -0.29723683  | -2.503050937 | 17.0412093  |
|        |              | Ne   | 2.300167282  | -1.13750734  | 6.496895675 |
|        |              | Ne   | 1.835592785  | 1.829069539  | 11.79101835 |
|        |              | Ne   | 2.293904791  | -1.190508459 | 11.80676128 |
|        |              | Ne   | -1.786880603 | -1.858604516 | 9.204124878 |
|        |              | Ne   | 2.505403454  | 0.427381062  | 3.897845212 |
|        |              | Ne   | 2.569636968  | 0.365607142  | 14.38924046 |
|        |              | Ne   | 1.858205858  | 1.676430778  | 16.95498863 |
|        |              | Ne   | -1.189560717 | 2.288969002  | 11.7505855  |
|        |              | Ne   | -1.778142552 | -1.831616326 | 4.0227134   |
|        |              | Ne   | -1.143942181 | 2.221060971  | 16.99662368 |

Ne

| Length | Cluster size | Atom | x            | y            | z           |
|--------|--------------|------|--------------|--------------|-------------|
|        |              | Ne   | -0.013965518 | 2.816062319  | 13.4420639  |
|        |              | Ne   | -2.650813061 | 0.896085789  | 5.321656683 |
|        |              | Ne   | 2.793892463  | -0.346413542 | 3.561205726 |
|        |              | Ne   | 2.529061286  | 1.2313521    | 14.06815439 |
|        |              | Ne   | -2.714589972 | -0.24492006  | 2.517959803 |
|        |              | Ne   | -1.232628676 | -2.524463481 | 9.600370945 |
|        |              | Ne   | -1.934401568 | -2.036960836 | 4.716446586 |
|        |              | Ne   | 2.416860002  | -1.416979629 | 6.349993103 |
|        |              | Ne   | -0.111485615 | -2.824831906 | 6.856305118 |
|        |              | Ne   | 0.82437619   | 2.669747829  | 8.552091886 |
|        |              | Ne   | 1.675522793  | -2.229495972 | 9.202468409 |
|        |              | Ne   | -2.059958388 | 1.90354248   | 8.033316514 |
|        |              | Ne   | -2.594637992 | -1.104594171 | 7.437196861 |
|        |              | Ne   | 0.116832225  | -0.001858708 | 7.574977927 |
|        |              | Ne   | -1.413514023 | 2.367472024  | 3.014302772 |
|        |              | Ne   | 0.906499123  | -2.647565219 | 4.002202237 |
|        |              | Ne   | 2.776374326  | 0.188793419  | 16.89470657 |
|        |              | Ne   | 2.742350528  | 0.464204218  | 8.939305007 |
|        |              | Ne   | -2.562879331 | 1.150579368  | 12.80917632 |
| 20     | 40           | Ne   | -1.902920631 | 2.036189107  | 15.55075347 |
|        |              | Ne   | 2.7116529    | -0.668327242 | 11.77632855 |
|        |              | Ne   | -0.137820913 | -0.126945304 | 16.4706223  |
|        |              | Ne   | 1.307708591  | -2.481186467 | 17.36568369 |
|        |              | Ne   | -1.136072099 | 2.577538031  | 10.73072425 |
|        |              | Ne   | 2.244282727  | -1.686736091 | 14.59536323 |
|        |              | Ne   | -0.507654788 | -2.744851983 | 14.92112406 |
|        |              | Ne   | 0.084846091  | -0.079665177 | 10.53875992 |
|        |              | Ne   | 2.34086518   | 1.501348083  | 6.095213283 |
|        |              | Ne   | -2.674182506 | -0.782016941 | 15.05013489 |
|        |              | Ne   | -2.753251619 | 0.070814018  | 17.91613193 |
|        |              | Ne   | 1.036056785  | 2.581122138  | 16.21159199 |
|        |              | Ne   | -2.810293939 | 0.025039078  | 10.12207231 |
|        |              | Ne   | 0.648461912  | -2.704152395 | 12.07032142 |
|        |              | Ne   | -0.317756943 | 2.758426091  | 5.800089984 |
|        |              | Ne   | -2.12361274  | -1.803684886 | 12.33123926 |
|        |              | Ne   | 0.07308891   | 0.091086357  | 4.606658093 |
|        |              | Ne   | 1.846638832  | 2.130021773  | 11.30256065 |
|        |              | Ne   | -0.004609058 | -0.115751486 | 13.49900992 |
|        |              | Ne   | 1.517042613  | 2.338916206  | 3.308771182 |
|        |              | Ne   | -1.036444052 | 2.506074794  | 18.35208901 |

**Ne**

| Length | Cluster size | Atom | x            | y            | z           |
|--------|--------------|------|--------------|--------------|-------------|
|        |              | Ne   | -0.340601711 | -3.068498985 | 14.77589951 |
|        |              | Ne   | 1.750798575  | -2.55029172  | 12.73791365 |
|        |              | Ne   | -3.080576858 | 0.113570595  | 8.211283997 |
|        |              | Ne   | -1.759025573 | 2.499045497  | 18.13929947 |
|        |              | Ne   | 2.328804613  | 2.02611515   | 11.46393278 |
|        |              | Ne   | 0.396074938  | -3.052924572 | 17.78416417 |
|        |              | Ne   | 1.01565729   | 2.9170315    | 17.18823194 |
|        |              | Ne   | -2.93321983  | 0.898406947  | 5.323442134 |
|        |              | Ne   | 1.037949771  | -2.863969541 | 9.870144893 |
|        |              | Ne   | -2.730392403 | -1.426674413 | 13.94820745 |
|        |              | Ne   | -1.143605499 | 2.872341931  | 15.18544707 |
|        |              | Ne   | 3.019394004  | 0.6678078    | 5.675782728 |
|        |              | Ne   | 0.277931384  | -3.073815043 | 7.010302282 |
|        |              | Ne   | 0.072620261  | 0.023970821  | 17.76040052 |
|        |              | Ne   | 0.431242578  | 3.057931674  | 9.430709459 |
|        |              | Ne   | 1.202568119  | 2.82526733   | 6.531222572 |
|        |              | Ne   | -1.311452785 | -2.746712568 | 1.328932725 |
|        |              | Ne   | -0.935998298 | 2.929480644  | 4.476412558 |
|        |              | Ne   | -0.028472027 | 0.004305514  | 14.81673004 |
|        |              | Ne   | -1.113959134 | -2.869545408 | 11.92057747 |
|        |              | Ne   | 2.58916597   | 1.546690789  | 19.27395876 |
|        |              | Ne   | 2.288487716  | -2.015090026 | 15.64966392 |
|        |              | Ne   | -2.243368719 | 2.094418919  | 10.25855217 |
|        |              | Ne   | -0.014665048 | -0.104064435 | 3.077109814 |
| 20     | 50           | Ne   | 1.730623002  | 2.537575487  | 14.34751046 |
|        |              | Ne   | 2.673918956  | -1.472760548 | 7.774006711 |
|        |              | Ne   | -2.978253889 | 0.722437956  | 16.01689037 |
|        |              | Ne   | 3.047421774  | -0.00850131  | 13.53904417 |
|        |              | Ne   | 1.592767332  | -2.60467239  | 2.048724168 |
|        |              | Ne   | -2.391007802 | -1.92974544  | 6.192901213 |
|        |              | Ne   | 3.056195879  | -0.114790274 | 2.798316863 |
|        |              | Ne   | -3.011061551 | -0.165805305 | 18.87828088 |
|        |              | Ne   | -2.97829439  | -0.691631822 | 11.06369463 |
|        |              | Ne   | -1.819298893 | -2.494954499 | 9.0325022   |
|        |              | Ne   | -0.022583845 | 0.015076236  | 8.955606964 |
|        |              | Ne   | -2.229782689 | -2.086783776 | 16.7967102  |
|        |              | Ne   | -1.645403424 | 2.575569845  | 7.379036705 |
|        |              | Ne   | 0.033923917  | -0.013087317 | 11.88549541 |
|        |              | Ne   | 2.764632459  | -1.362834931 | 18.51464827 |
|        |              | Ne   | 2.975160827  | 0.789730463  | 16.41335375 |
|        |              | Ne   | 1.808759255  | 2.485170537  | 3.566397837 |
|        |              | Ne   | -0.518479199 | -3.001746657 | 4.17347873  |
|        |              | Ne   | -2.585055344 | 1.614338426  | 2.401072841 |
|        |              | Ne   | -2.84594508  | -1.227740698 | 3.312525539 |
|        |              | Ne   | 2.982386716  | -0.763891249 | 10.67039167 |
|        |              | Ne   | 2.230798121  | -2.109723989 | 4.927576789 |
|        |              | Ne   | 0.019171829  | -0.0206503   | 6.023617683 |
|        |              | Ne   | -2.708710086 | 1.417194288  | 13.12952576 |
|        |              | Ne   | -0.338292116 | 3.049901293  | 12.31353857 |
|        |              | Ne   | 2.749848352  | 1.369341957  | 8.596633914 |

**Ne**

| Length | Cluster size | Atom | x            | y            | z           |
|--------|--------------|------|--------------|--------------|-------------|
| 30     | 10           | Ne   | 1.88666E-06  | 3.50506E-06  | 22.08461678 |
|        |              | Ne   | 1.77408E-06  | -1.3435E-06  | 13.58317113 |
|        |              | Ne   | -1.84E-07    | -8.48071E-09 | 5.07956004  |
|        |              | Ne   | 1.30179E-06  | 6.67507E-07  | 16.41683543 |
|        |              | Ne   | 3.2146E-06   | 1.57901E-06  | 10.74944414 |
|        |              | Ne   | -2.44773E-06 | -7.83419E-07 | 2.22891349  |
|        |              | Ne   | 3.85207E-06  | -5.72485E-07 | 19.25056026 |
|        |              | Ne   | 5.01504E-06  | 3.24339E-06  | 24.92043827 |
|        |              | Ne   | -3.84312E-07 | -2.87732E-06 | 7.915384355 |
|        |              | Ne   | 4.64952E-06  | -2.72635E-06 | 27.77108612 |

**Ne**

| Length | Cluster size | Atom | x            | y            | z           |
|--------|--------------|------|--------------|--------------|-------------|
| 30     | 20           | Ne   | 1.395007466  | -0.352580046 | 13.73752732 |
|        |              | Ne   | 0.565124962  | -1.198921316 | 3.873069963 |
|        |              | Ne   | -0.684652167 | 1.261628149  | 14.71639362 |
|        |              | Ne   | -0.525747    | -1.33602021  | 15.76947688 |
|        |              | Ne   | 1.364450774  | -0.235727698 | 22.71765103 |
|        |              | Ne   | 0.464249842  | -1.332755895 | 18.96815183 |
|        |              | Ne   | -1.173563354 | -0.818622551 | 12.64354426 |
|        |              | Ne   | 0.411295159  | 1.260477731  | 26.70713086 |
|        |              | Ne   | -1.319873136 | 0.438939958  | 9.153956046 |
|        |              | Ne   | -0.069727082 | 1.355155616  | 5.254232927 |
|        |              | Ne   | 0.267213571  | 1.39230875   | 11.56411683 |
|        |              | Ne   | -0.752035817 | -1.154111525 | 6.625057272 |
|        |              | Ne   | -0.958375266 | 0.989997161  | 23.97375549 |
|        |              | Ne   | 0.767362286  | -1.173671729 | 10.34747377 |
|        |              | Ne   | -1.212058164 | -0.674631706 | 21.42691846 |
|        |              | Ne   | 0.202931412  | -1.347251934 | 25.32038766 |
|        |              | Ne   | -1.268076975 | 0.658287703  | 17.86092487 |
|        |              | Ne   | 0.547839469  | 1.284096333  | 20.20207468 |
|        |              | Ne   | 1.288504583  | 0.509817058  | 7.85998703  |
|        |              | Ne   | 1.339515398  | 0.521582769  | 16.75806849 |

Ne

| Length | Cluster size | Atom | x            | y            | z           |
|--------|--------------|------|--------------|--------------|-------------|
|        |              | Ne   | -0.262474718 | -1.48307941  | 15.69256001 |
|        |              | Ne   | -1.326682699 | 0.757142852  | 7.321156628 |
|        |              | Ne   | -0.615322942 | -1.387924127 | 5.467531746 |
|        |              | Ne   | 0.020219854  | -1.493928182 | 25.95785006 |
|        |              | Ne   | -0.826592964 | -1.276755828 | 23.13144988 |
|        |              | Ne   | -1.187149317 | 0.957678612  | 24.99025193 |
|        |              | Ne   | 1.156473416  | -0.990593214 | 11.0367745  |
|        |              | Ne   | -0.648465239 | 1.354998122  | 4.479608513 |
|        |              | Ne   | 0.318966126  | 1.409163189  | 1.66559316  |
|        |              | Ne   | 0.872869307  | 1.255230744  | 9.182498211 |
|        |              | Ne   | 1.45527337   | -0.452052924 | 3.61564176  |
|        |              | Ne   | -0.348563411 | 1.465355381  | 22.20702651 |
|        |              | Ne   | 1.073085234  | 1.089272351  | 26.8371651  |
|        |              | Ne   | 0.655212034  | -1.361732156 | 18.47580585 |
| 30     | 30           | Ne   | -1.489463011 | -0.190425595 | 10.10472474 |
|        |              | Ne   | 1.356525146  | -0.688472907 | 21.26931854 |
|        |              | Ne   | 1.503385947  | -0.104390228 | 13.83038251 |
|        |              | Ne   | 0.350700201  | -1.457110817 | 8.240341068 |
|        |              | Ne   | 1.491231238  | 0.189417042  | 24.06903192 |
|        |              | Ne   | 1.2982122    | 0.789849605  | 16.61632447 |
|        |              | Ne   | -1.453735607 | 0.417758365  | 17.55563501 |
|        |              | Ne   | -1.221103786 | -0.844781153 | 2.580079472 |
|        |              | Ne   | -0.911134474 | 1.21849504   | 14.758282   |
|        |              | Ne   | -1.111874247 | -1.03512915  | 12.89683136 |
|        |              | Ne   | -1.419460773 | -0.502966134 | 20.3412732  |
|        |              | Ne   | -0.043232463 | 1.506257963  | 11.97001734 |
|        |              | Ne   | -1.46755119  | 0.203180321  | 27.87716317 |
|        |              | Ne   | 0.9326508    | -1.124471475 | 28.76211024 |
|        |              | Ne   | 0.555400248  | 1.415340153  | 19.41446623 |
|        |              | Ne   | 1.412802099  | 0.512984746  | 6.377972182 |

## Ne

| Length | Cluster size | Atom | x            | y            | z           |
|--------|--------------|------|--------------|--------------|-------------|
|        |              | Ne   | 1.523659314  | -1.302200691 | 8.502497266 |
|        |              | Ne   | -1.521820653 | -1.322117234 | 24.17304324 |
|        |              | Ne   | -1.498895517 | -1.301503959 | 1.743183093 |
|        |              | Ne   | -1.96857286  | -0.367667997 | 19.40205969 |
|        |              | Ne   | 0.525793526  | -1.93625771  | 11.21088583 |
|        |              | Ne   | -1.822997401 | 0.842483703  | 7.18202568  |
|        |              | Ne   | 1.519707212  | -1.318030099 | 23.5035921  |
|        |              | Ne   | 2.005482409  | -0.211402572 | 5.782203529 |
|        |              | Ne   | -1.157787626 | 1.636368025  | 17.36271272 |
|        |              | Ne   | -1.836676512 | 0.811587056  | 14.6286772  |
|        |              | Ne   | -0.018403336 | 2.01618583   | 5.121417584 |
|        |              | Ne   | 1.974537832  | -0.196052292 | 28.24425228 |
|        |              | Ne   | -1.970716425 | -0.305584875 | 26.94839323 |
|        |              | Ne   | 1.986905971  | -0.244064815 | 20.7793252  |
|        |              | Ne   | -0.501770141 | -1.94581825  | 6.458823453 |
|        |              | Ne   | 1.812420812  | 0.884483411  | 25.49521979 |
|        |              | Ne   | -1.990233084 | -0.255544908 | 11.8929858  |
|        |              | Ne   | -1.993106585 | -0.309781439 | 4.48197211  |
|        |              | Ne   | 1.808417067  | 0.86123746   | 2.981410642 |
| 30     | 40           | Ne   | 0.637121905  | -1.89937013  | 18.74020681 |
|        |              | Ne   | 0.047078741  | 2.007232833  | 12.59900163 |
|        |              | Ne   | -1.115781595 | 1.682639075  | 24.83427283 |
|        |              | Ne   | -0.077227077 | 2.000330947  | 20.07107068 |
|        |              | Ne   | 1.791254383  | 0.896933372  | 18.06568741 |
|        |              | Ne   | 0.552520004  | -1.935670642 | 26.26462917 |
|        |              | Ne   | 1.550524145  | -1.277322659 | 16.01577882 |
|        |              | Ne   | 1.079267669  | 1.694302588  | 7.852345937 |
|        |              | Ne   | 1.063878263  | 1.702592153  | 15.33498991 |
|        |              | Ne   | -0.529523963 | -1.934100826 | 21.45005171 |
|        |              | Ne   | -0.058647195 | 2.002539563  | 27.60135945 |
|        |              | Ne   | -1.048391444 | 1.707514701  | 9.888242839 |
|        |              | Ne   | 1.842980535  | 0.79086864   | 10.55519246 |
|        |              | Ne   | 0.670274183  | -1.901046091 | 3.708406953 |
|        |              | Ne   | -0.564285434 | -1.929455382 | 13.9454204  |
|        |              | Ne   | 1.984411101  | -0.319866913 | 13.27421913 |
|        |              | Ne   | -1.518653935 | -1.303349667 | 9.171160807 |
|        |              | Ne   | -1.844072198 | 0.798314934  | 22.10742224 |
|        |              | Ne   | -1.102021542 | 1.672194147  | 2.376709844 |
|        |              | Ne   | 1.050254167  | 1.715647444  | 22.77495996 |
|        |              | Ne   | -1.464448318 | -1.373231052 | 16.68521214 |

Ne

| Length | Cluster size | Atom | x            | y            | z           |
|--------|--------------|------|--------------|--------------|-------------|
|        |              | Ne   | 0.727748065  | 2.440461253  | 5.578771227 |
|        |              | Ne   | 2.551974657  | 0.049472597  | 5.521564997 |
|        |              | Ne   | -1.147512489 | 2.227604779  | 27.13280127 |
|        |              | Ne   | -2.105883069 | 1.396981895  | 5.728748369 |
|        |              | Ne   | -2.072777589 | 1.54779971   | 10.96263065 |
|        |              | Ne   | -2.010896844 | -1.562945768 | 5.85653344  |
|        |              | Ne   | -0.968567089 | 2.332920081  | 3.111141901 |
|        |              | Ne   | -2.254490727 | 1.262969655  | 19.40111619 |
|        |              | Ne   | -1.900806934 | -1.6671121   | 24.58484871 |
|        |              | Ne   | -0.803593928 | 2.442606867  | 8.225321667 |
|        |              | Ne   | 0.534342279  | 2.499940604  | 24.62294653 |
|        |              | Ne   | 0.822926272  | -2.408714679 | 5.641775868 |
|        |              | Ne   | -0.706018139 | 2.492792243  | 13.65205347 |
|        |              | Ne   | 1.875180978  | 1.694506219  | 27.24440741 |
|        |              | Ne   | 0.02341215   | -0.000596905 | 20.86616205 |
|        |              | Ne   | -2.084084895 | -1.534149292 | 10.93790573 |
|        |              | Ne   | -0.713562239 | -2.508747155 | 8.322454232 |
|        |              | Ne   | 0.835327851  | -2.443800076 | 10.90961397 |
|        |              | Ne   | -2.579805603 | 0.084275613  | 13.62730084 |
|        |              | Ne   | 0.031909545  | 0.006368475  | 9.450717005 |
|        |              | Ne   | -0.499278819 | -2.529686799 | 22.07220198 |
|        |              | Ne   | 1.809390841  | 1.835622507  | 16.63454222 |
|        |              | Ne   | -0.398187429 | -2.557560192 | 16.68243224 |
|        |              | Ne   | 0.8242459    | 2.442385912  | 10.94128667 |
| 30     | 50           | Ne   | -0.717311909 | -2.402868439 | 27.25944532 |
|        |              | Ne   | -2.483184433 | -0.32656853  | 3.181864544 |
|        |              | Ne   | 1.120409265  | -2.329821353 | 19.36734538 |
|        |              | Ne   | -1.033557221 | 2.390738581  | 22.03610461 |
|        |              | Ne   | 2.548615394  | 0.228828835  | 24.73767252 |
|        |              | Ne   | -0.87436159  | -2.415052441 | 13.64588018 |
|        |              | Ne   | 2.22324792   | -1.298187356 | 22.17188974 |
|        |              | Ne   | -1.175664664 | 2.281771727  | 16.65498779 |
|        |              | Ne   | -2.58541116  | -0.301463327 | 21.97461491 |
|        |              | Ne   | 2.575915704  | 0.004023627  | 10.89619572 |
|        |              | Ne   | 2.069249397  | 1.54400347   | 8.121527797 |
|        |              | Ne   | 2.152639956  | 1.43174994   | 13.67681255 |
|        |              | Ne   | 1.015434262  | -2.327860395 | 24.77510711 |
|        |              | Ne   | -0.014882901 | -0.00580655  | 15.1594957  |
|        |              | Ne   | 0.006301562  | 0.003818172  | 18.02045088 |
|        |              | Ne   | -2.541898462 | -0.40680662  | 16.69061943 |
|        |              | Ne   | 2.146828588  | -1.465441121 | 8.163618119 |
|        |              | Ne   | 2.554161244  | 0.319119438  | 19.39273359 |
|        |              | Ne   | 0.011531056  | 0.000183685  | 12.29796597 |
|        |              | Ne   | 2.021020111  | -1.589607173 | 13.68128996 |
|        |              | Ne   | -1.874339847 | -1.789203103 | 19.37482014 |
|        |              | Ne   | 0.51106502   | 2.523279903  | 19.41450442 |
|        |              | Ne   | 1.954165868  | 1.702539267  | 22.13952063 |
|        |              | Ne   | -2.594239485 | -0.019248108 | 8.36236797  |
|        |              | Ne   | 2.315221924  | -1.161924047 | 16.65393868 |
|        |              | Ne   | -2.216026356 | 1.263723927  | 24.50786043 |



Ne

| Length | Cluster size | Atom | x            | y            | z           |
|--------|--------------|------|--------------|--------------|-------------|
| 50     | 10           | Ne   | 8.99129E-08  | 3.54871E-07  | 11.15638184 |
|        |              | Ne   | -2.40587E-06 | -2.59323E-07 | 35.99750258 |
|        |              | Ne   | 6.50432E-09  | 1.54556E-07  | 32.89255069 |
|        |              | Ne   | 4.57269E-07  | 1.40476E-08  | 14.2656262  |
|        |              | Ne   | -1.44007E-07 | -3.04783E-07 | 26.68356304 |
|        |              | Ne   | -5.37797E-08 | 1.23707E-08  | 23.57919067 |
|        |              | Ne   | 4.97544E-08  | 2.9987E-07   | 17.37040188 |
|        |              | Ne   | -3.98595E-06 | -1.59071E-06 | 39.10693194 |
|        |              | Ne   | 1.90993E-07  | 9.29961E-08  | 20.47481884 |
|        |              | Ne   | -1.32123E-07 | 1.96365E-08  | 29.78799774 |

Ne

| Length | Cluster size | Atom        | x            | y            | z           |
|--------|--------------|-------------|--------------|--------------|-------------|
| 50     | 20           | Ne          | -3.96159E-06 | 1.63568E-06  | 10.54942782 |
|        |              | Ne          | -4.78541E-06 | 7.78193E-06  | 28.95046308 |
|        |              | Ne          | 1.99325E-06  | -1.43387E-06 | 0           |
|        |              | Ne          | -7.04503E-07 | -2.68384E-07 | 7.920567211 |
|        |              | Ne          | -0.006111292 | -0.002062209 | 47.3541129  |
|        |              | Ne          | 1.84236E-06  | -3.00767E-07 | 5.291253274 |
|        |              | Ne          | -6.79639E-07 | -8.8878E-06  | 23.69304297 |
|        |              | Ne          | -2.36518E-06 | -5.16271E-06 | 36.83660407 |
|        |              | Ne          | -1.84678E-06 | 1.35446E-06  | 2.659022502 |
|        |              | Ne          | 7.11324E-07  | -2.33882E-06 | 31.57917106 |
|        |              | Ne          | 0.000687908  | 0.000218311  | 44.72328014 |
|        |              | Ne          | 8.62369E-06  | -6.37975E-06 | 13.17818548 |
|        |              | Ne          | -7.85344E-06 | 1.80256E-06  | 15.80690866 |
|        |              | Ne          | -0.000177981 | -6.1961E-05  | 42.09416383 |
|        |              | Ne          | 2.36741E-05  | 1.3535E-05   | 39.46534605 |
|        |              | Ne          | -0.006122513 | -0.003336361 | 50          |
|        |              | Ne          | -7.79976E-06 | -4.94116E-06 | 18.43562054 |
|        |              | Ne          | -2.53275E-06 | 8.31242E-07  | 34.20788151 |
| Ne     | -3.65552E-06 | 2.4002E-06  | 26.32175118  |              |             |
| Ne     | 6.98824E-06  | 6.18174E-06 | 21.0643327   |              |             |

Ne

| Length | Cluster size | Atom | x            | y            | z           |
|--------|--------------|------|--------------|--------------|-------------|
|        |              | Ne   | 0.891834535  | -0.840207063 | 25.74246869 |
|        |              | Ne   | -0.970819612 | 0.747751587  | 36.42717348 |
|        |              | Ne   | -0.950630694 | 0.77728561   | 21.17149678 |
|        |              | Ne   | 0.870170773  | -0.837959542 | 28.79824533 |
|        |              | Ne   | 0.96564531   | -0.732012434 | 22.6935439  |
|        |              | Ne   | -0.840684475 | 0.878088242  | 24.21427125 |
|        |              | Ne   | -0.969266451 | 0.741122595  | 27.27950382 |
|        |              | Ne   | -0.996926053 | 0.695643647  | 45.57381984 |
|        |              | Ne   | 0.978531165  | -0.731719586 | 16.59711572 |
|        |              | Ne   | -1.021139485 | 0.662683469  | 12.01365423 |
|        |              | Ne   | -1.043001779 | 0.643772771  | 5.896103673 |
|        |              | Ne   | 0.902988374  | -0.815652569 | 34.8969889  |
|        |              | Ne   | 1.002135966  | -0.599471642 | 47.21994787 |
|        |              | Ne   | -0.902076353 | 0.829446323  | 15.0560436  |
| 50     | 30           | Ne   | -0.878721424 | 0.844314216  | 8.947794861 |
|        |              | Ne   | 1.070555816  | -0.568371752 | 44.07751489 |
|        |              | Ne   | -1.002554104 | 0.677539799  | 33.37568245 |
|        |              | Ne   | 0.935520184  | -0.788935146 | 4.371247722 |
|        |              | Ne   | -0.947154999 | 0.749685303  | 39.48212638 |
|        |              | Ne   | 0.984195027  | -0.701787199 | 7.432445004 |
|        |              | Ne   | 0.886367722  | -0.826229475 | 13.53389159 |
|        |              | Ne   | 0.957897743  | -0.766542065 | 10.48474452 |
|        |              | Ne   | 1.006275817  | -0.70380885  | 31.85554587 |
|        |              | Ne   | 1.036244275  | -0.642555498 | 37.9630407  |
|        |              | Ne   | 0.792534853  | -0.932972793 | 19.63347717 |
|        |              | Ne   | 0.930912393  | -0.799143114 | 41.0046471  |
|        |              | Ne   | -0.885089828 | 0.82307643   | 18.11452056 |
|        |              | Ne   | -1.074721025 | 0.588344152  | 42.53928035 |
|        |              | Ne   | -0.835637318 | 0.897360193  | 30.31767163 |
|        |              | Ne   | -0.884144222 | 0.728841822  | 2.73741127  |

Ne

| Length | Cluster size | Atom | x            | y            | z           |
|--------|--------------|------|--------------|--------------|-------------|
|        |              | Ne   | 0.849321389  | 1.234451209  | 9.635271248 |
|        |              | Ne   | 1.4734804    | 0.236065902  | 36.81975084 |
|        |              | Ne   | -0.028717106 | 1.503128693  | 12.68596855 |
|        |              | Ne   | -1.29192589  | -0.706166976 | 43.95570704 |
|        |              | Ne   | -1.388869119 | -0.572582426 | 32.80998534 |
|        |              | Ne   | 0.741102681  | -1.311769482 | 30.81707992 |
|        |              | Ne   | -0.653642864 | -1.289404628 | 5.505956451 |
|        |              | Ne   | 1.31156518   | 0.695856266  | 17.73420168 |
|        |              | Ne   | -0.136165359 | -1.487532336 | 27.75455667 |
|        |              | Ne   | -1.332383366 | 0.706473036  | 7.669307432 |
|        |              | Ne   | -0.9619308   | -1.12900484  | 24.773829   |
|        |              | Ne   | 1.123681915  | -0.971886847 | 11.64734886 |
|        |              | Ne   | 0.062074497  | -1.479889708 | 38.84589458 |
|        |              | Ne   | 1.493747663  | -0.161448893 | 14.68381954 |
|        |              | Ne   | -0.210527704 | 1.487759707  | 23.74835351 |
|        |              | Ne   | -1.144747719 | 0.970630246  | 37.88690716 |
|        |              | Ne   | -0.823145173 | -1.238918762 | 35.87000473 |
|        |              | Ne   | 0.492384078  | 1.397454139  | 31.81092969 |
|        |              | Ne   | -0.346019657 | -1.463859074 | 16.68034402 |
| 50     | 40           | Ne   | 0.544331666  | -1.396400581 | 19.75253766 |
|        |              | Ne   | -0.998407986 | 1.100774572  | 26.80099819 |
|        |              | Ne   | 0.88487946   | -1.21299282  | 41.90601137 |
|        |              | Ne   | 1.410001682  | -0.235799354 | 45.13799676 |
|        |              | Ne   | 1.093990697  | 1.032977217  | 39.88663162 |
|        |              | Ne   | 1.220755665  | 0.871966059  | 28.81694062 |
|        |              | Ne   | 1.331342483  | -0.655866765 | 33.84328666 |
|        |              | Ne   | 1.234350474  | -0.820239172 | 22.74156098 |
|        |              | Ne   | -0.39505695  | 1.448729929  | 34.80787597 |
|        |              | Ne   | 0.299645442  | 1.456132001  | 42.88306185 |
|        |              | Ne   | -1.101064461 | -0.993370224 | 13.67534604 |
|        |              | Ne   | 0.65564414   | 1.329254113  | 20.71089394 |
|        |              | Ne   | -1.477547681 | 0.112928545  | 40.87966543 |
|        |              | Ne   | -1.481275694 | -0.201003234 | 10.67834595 |
|        |              | Ne   | 1.502873423  | 0.024200846  | 25.74466937 |
|        |              | Ne   | -1.448296417 | 0.309382857  | 29.77929148 |
|        |              | Ne   | -0.856266222 | 1.210286875  | 15.70580214 |
|        |              | Ne   | -1.410057598 | 0.497549076  | 18.68801087 |
|        |              | Ne   | 0.382252633  | -1.432345789 | 8.626563766 |
|        |              | Ne   | 1.343595493  | 0.58048834   | 6.558726685 |
|        |              | Ne   | -1.453119109 | -0.394523894 | 21.75499273 |

Ne

| Length | Cluster size | Atom | x            | y            | z           |
|--------|--------------|------|--------------|--------------|-------------|
|        |              | Ne   | -0.124596635 | -1.513534777 | 34.00210078 |
|        |              | Ne   | 1.214619812  | -0.903201818 | 38.77348764 |
|        |              | Ne   | -0.551291453 | -1.395954294 | 44.50100689 |
|        |              | Ne   | 1.374638357  | -0.583278076 | 28.1174363  |
|        |              | Ne   | -0.389801819 | -1.464434477 | 3.883703319 |
|        |              | Ne   | -1.421494406 | 0.513825009  | 5.756477524 |
|        |              | Ne   | 0.328995094  | -1.482991578 | 41.56395992 |
|        |              | Ne   | -1.504550414 | -0.255361281 | 39.6476952  |
|        |              | Ne   | -0.650251772 | -1.352500488 | 21.74168114 |
|        |              | Ne   | 0.250008167  | 1.490153003  | 17.98824874 |
|        |              | Ne   | -0.7404702   | 1.393261772  | 27.72964042 |
|        |              | Ne   | -0.133612582 | 1.495773928  | 37.78150207 |
|        |              | Ne   | -1.366484653 | 0.660446     | 42.49885504 |
|        |              | Ne   | -0.995407243 | -1.15258953  | 36.85160983 |
|        |              | Ne   | -1.444332936 | -0.47870678  | 8.579601132 |
|        |              | Ne   | 0.046546813  | -1.514242573 | 14.21778378 |
|        |              | Ne   | 1.504049485  | 0.207015783  | 12.33471092 |
|        |              | Ne   | 0.917303723  | -1.237147117 | 31.2321442  |
|        |              | Ne   | 1.513469791  | 0.000286785  | 35.93596167 |
|        |              | Ne   | 0.519874694  | 1.415560735  | 30.2987468  |
|        |              | Ne   | -1.236811534 | -0.881421219 | 18.878722   |
|        |              | Ne   | -0.534233852 | 1.454456344  | 45.19839326 |
|        |              | Ne   | 1.304439219  | -0.738410551 | 9.517304989 |
|        |              | Ne   | -1.158757748 | 0.961372484  | 13.27442868 |
| 50     | 50           | Ne   | 0.648199502  | -1.252076261 | 49.00052345 |
|        |              | Ne   | -1.42007218  | -0.369662249 | 47.2177523  |
|        |              | Ne   | 0.614535332  | -1.382381486 | 6.700268447 |
|        |              | Ne   | 1.453229067  | 0.413876472  | 43.38665206 |
|        |              | Ne   | 0.782636315  | 1.277090439  | 40.62501426 |
|        |              | Ne   | -1.076671011 | -1.047587132 | 26.38695518 |
|        |              | Ne   | 0.739013929  | -1.397534105 | 24.25429539 |
|        |              | Ne   | -1.232809383 | -0.867369181 | 29.4011063  |
|        |              | Ne   | 1.301187177  | 0.753733352  | 4.790534207 |
|        |              | Ne   | 1.053846813  | 1.077772883  | 15.15557195 |
|        |              | Ne   | 0.625436133  | 1.369026459  | 7.630205088 |
|        |              | Ne   | 1.425303724  | -0.261877301 | 1.917491229 |
|        |              | Ne   | 1.174974773  | 0.966974105  | 33.1583748  |
|        |              | Ne   | -0.921523759 | 1.172028456  | 2.8780568   |
|        |              | Ne   | -1.464152968 | 0.277719695  | 32.11566563 |
|        |              | Ne   | -1.05970037  | 1.065191025  | 34.98438553 |
|        |              | Ne   | -0.350620958 | 1.482816074  | 10.45390689 |
|        |              | Ne   | -1.334022987 | 0.635221182  | 23.88411153 |
|        |              | Ne   | -1.511717218 | 0.112475005  | 16.09234725 |
|        |              | Ne   | 1.065387355  | 1.052509833  | 25.5805675  |
|        |              | Ne   | 1.286181312  | 0.834355549  | 22.58385009 |
|        |              | Ne   | -0.845853649 | 1.296742109  | 20.75553958 |
|        |              | Ne   | 1.445909309  | -0.279305637 | 46.34522449 |
|        |              | Ne   | -0.856123803 | -1.233151273 | 11.3984896  |
|        |              | Ne   | 1.437266293  | -0.402652108 | 19.8950059  |
|        |              | Ne   | 0.98699805   | -1.142184253 | 17.03439254 |

**Ar**

| Length | Cluster size | Atom | x            | y            | z           |
|--------|--------------|------|--------------|--------------|-------------|
| 10     | 10           | Ar   | 1.895796487  | -0.574906772 | 1.055711467 |
|        |              | Ar   | 2.036577565  | -0.617753012 | 5.025611167 |
|        |              | Ar   | 0.554185215  | 2.011253918  | 6.897488137 |
|        |              | Ar   | 0.639068108  | 2.013737355  | 3.164329778 |
|        |              | Ar   | 1.902750226  | -0.571739474 | 8.942784133 |
|        |              | Ar   | -1.887417328 | 0.589466678  | 1.073096488 |
|        |              | Ar   | -2.039627235 | 0.628001822  | 4.965877059 |
|        |              | Ar   | -1.978776232 | 0.529040719  | 8.992636134 |
|        |              | Ar   | -0.602012427 | -2.020374048 | 3.151790709 |
|        |              | Ar   | -0.628935283 | -1.996208428 | 6.862710939 |

Ar

| Length | Cluster size | Atom | x            | y            | z           |
|--------|--------------|------|--------------|--------------|-------------|
|        |              | Ar   | -0.64271858  | 3.438547599  | 2.592894758 |
|        |              | Ar   | 1.339698177  | -3.242480412 | 3.787775984 |
|        |              | Ar   | -1.993660166 | 2.892442883  | 5.908988913 |
|        |              | Ar   | 3.522178789  | -0.051794754 | 4.817674611 |
|        |              | Ar   | -2.323368082 | -2.571117268 | 3.024324223 |
|        |              | Ar   | 0.32801899   | -3.425929468 | 9.879799311 |
|        |              | Ar   | 2.521457056  | -2.479198412 | 7.213480494 |
|        |              | Ar   | -1.114100849 | -3.314096173 | 6.444327606 |
|        |              | Ar   | 1.686024213  | 3.080522523  | 5.59060055  |
| 10     | 20           | Ar   | -3.054518658 | 1.751764738  | 9.174773877 |
|        |              | Ar   | 3.312567032  | 1.092681683  | 8.332097992 |
|        |              | Ar   | 2.692851222  | 2.228932117  | 2.132068426 |
|        |              | Ar   | 3.198379022  | -1.294418436 | 1.384593541 |
|        |              | Ar   | -2.949860043 | -1.908807407 | 9.345414498 |
|        |              | Ar   | -0.09357307  | 0.091307066  | 4.343348658 |
|        |              | Ar   | -0.130265528 | -0.037909718 | 7.913014259 |
|        |              | Ar   | -3.353187935 | 1.005186056  | 2.729112107 |
|        |              | Ar   | -3.463055339 | -0.489494429 | 6.031104337 |
|        |              | Ar   | -0.294200673 | -0.011702271 | 0.743736959 |
|        |              | Ar   | 0.262847033  | 3.471343337  | 8.924381688 |

Ar

| Length | Cluster size | Atom | x            | y            | z           |
|--------|--------------|------|--------------|--------------|-------------|
|        |              | Ar   | -2.192445188 | 0.843532547  | 8.637046451 |
|        |              | Ar   | -2.256901306 | 4.366867271  | 7.327075264 |
|        |              | Ar   | -1.891635611 | -4.583269765 | 8.182763548 |
|        |              | Ar   | -0.646451394 | -1.830876473 | 6.336267854 |
|        |              | Ar   | 0.921840823  | 4.779647388  | 9.145023746 |
|        |              | Ar   | 1.067306423  | 4.771131688  | 5.483430823 |
|        |              | Ar   | 2.713685028  | -3.989843125 | 1.996542707 |
|        |              | Ar   | -1.350915448 | -1.48127721  | 2.746344177 |
|        |              | Ar   | -4.824848404 | -1.090777546 | 3.715463716 |
|        |              | Ar   | -2.075186301 | 4.530413174  | 3.663551311 |
|        |              | Ar   | 0.5881754    | -4.91232953  | 4.861192163 |
|        |              | Ar   | 1.826381132  | -0.283787668 | 4.031080615 |
|        |              | Ar   | -4.577913078 | 1.843593918  | 5.888739671 |
|        |              | Ar   | -2.941398244 | -4.066966557 | 4.665529113 |
| 10     | 30           | Ar   | 3.786573454  | -3.150215709 | 5.367052025 |
|        |              | Ar   | -2.213802312 | 4.738242305  | 0.028494727 |
|        |              | Ar   | 1.24350034   | 4.772173475  | 1.879293889 |
|        |              | Ar   | -4.346532073 | 2.172468865  | 2.141228935 |
|        |              | Ar   | -4.455831566 | -1.861479985 | 7.281909643 |
|        |              | Ar   | -0.028662744 | -1.915611737 | 10          |
|        |              | Ar   | 3.902450992  | 2.907362966  | 3.620094498 |
|        |              | Ar   | 1.863338063  | -4.512911577 | 8.214087019 |
|        |              | Ar   | 4.443090844  | -1.897759589 | 8.797554069 |
|        |              | Ar   | 1.639611985  | 0.501423796  | 7.765920954 |
|        |              | Ar   | -0.956344114 | -4.837822783 | 1.545637485 |
|        |              | Ar   | -0.586349877 | 1.746241732  | 1.514619644 |
|        |              | Ar   | 4.870444922  | -0.8452686   | 2.294368842 |
|        |              | Ar   | 4.962940791  | 0.221496613  | 5.866608391 |
|        |              | Ar   | -0.985041155 | 1.568929237  | 5.227756275 |
|        |              | Ar   | 3.76669889   | 3.275603764  | 7.344039942 |

|    |
|----|
| Ar |
|----|

| Length | Cluster size | Atom | x            | y            | z           |
|--------|--------------|------|--------------|--------------|-------------|
|        |              | Ar   | 4.08617122   | 4.110980044  | 8.053091057 |
|        |              | Ar   | 5.191695713  | 2.328810729  | 4.732429205 |
|        |              | Ar   | -1.730089647 | 5.40020823   | 1.167295404 |
|        |              | Ar   | 2.050648587  | -5.307313854 | 10          |
|        |              | Ar   | -5.686018179 | -0.761092725 | 9.042496242 |
|        |              | Ar   | 2.572326072  | -0.391021199 | 3.638577837 |
|        |              | Ar   | 1.259379304  | -1.802445745 | 8.823988038 |
|        |              | Ar   | -0.641347449 | -5.665792283 | 7.454022577 |
|        |              | Ar   | 0.276364976  | -2.447805881 | 1.745430985 |
|        |              | Ar   | -3.980323846 | -4.112908645 | 8.309803746 |
|        |              | Ar   | 2.731269614  | 5.105364977  | 4.864653387 |
|        |              | Ar   | 2.972946201  | -4.923895948 | 6.563703323 |
|        |              | Ar   | -3.072867346 | -4.784537205 | 4.811073791 |
|        |              | Ar   | 2.571311626  | 1.42812716   | 10          |
|        |              | Ar   | 4.903793676  | -2.820567939 | 8.841966885 |
|        |              | Ar   | -2.305399174 | -0.871916677 | 7.497685775 |
|        |              | Ar   | 5.664639576  | 0.771358199  | 7.993628355 |
|        |              | Ar   | -5.432565541 | -1.953802811 | 5.609451061 |
|        |              | Ar   | -3.181653647 | 4.825062891  | 7.262825283 |
| 10     | 40           | Ar   | -0.851115776 | 5.685462144  | 4.647819621 |
|        |              | Ar   | 0.631813845  | 5.645654133  | 7.985904759 |
|        |              | Ar   | 0.51572248   | -5.790983014 | 3.907459351 |
|        |              | Ar   | 3.831998309  | -4.196431101 | 3.226770912 |
|        |              | Ar   | 1.764862612  | -5.457793922 | 0.429141802 |
|        |              | Ar   | 5.483583365  | -1.759429144 | 5.383107114 |
|        |              | Ar   | -4.922481255 | -3.007628401 | 2.070165512 |
|        |              | Ar   | 0.865825266  | 2.824851354  | 2.737738042 |
|        |              | Ar   | -5.69715338  | 0.607298739  | 2.881587262 |
|        |              | Ar   | -1.65977753  | 2.071161599  | 5.341751625 |
|        |              | Ar   | -4.89146036  | 2.826658423  | 9.779536017 |
|        |              | Ar   | -1.005286164 | 2.332098997  | 8.993225278 |
|        |              | Ar   | -5.408996262 | 1.775304462  | 6.329138243 |
|        |              | Ar   | -2.042248436 | -5.314558413 | 1.348488697 |
|        |              | Ar   | 5.771731407  | -0.159426103 | 2.033123128 |
|        |              | Ar   | -2.437837433 | -1.081454595 | 3.778494979 |
|        |              | Ar   | 1.794917669  | 1.738248045  | 6.445254672 |
|        |              | Ar   | 4.764953924  | -3.050035784 | 0           |
|        |              | Ar   | -2.413939631 | 1.68564831   | 1.393478934 |
|        |              | Ar   | -4.153729419 | 4.028921512  | 3.67324808  |
|        |              | Ar   | 0.324864274  | -2.592253075 | 5.47950426  |



## Ar

| Length | Cluster size | Atom | x            | y            | z           |
|--------|--------------|------|--------------|--------------|-------------|
|        |              | Ar   | 2.345238201  | -2.211659959 | 3.863373226 |
|        |              | Ar   | -2.63737408  | 1.844516655  | 7.056938515 |
|        |              | Ar   | 6.332616514  | -0.827961668 | 5.535232935 |
|        |              | Ar   | -3.214821767 | 0.306853752  | 3.800925126 |
|        |              | Ar   | -4.638682153 | 4.321447641  | 1.353544332 |
|        |              | Ar   | -0.033046686 | 0.334678589  | 1.996447117 |
|        |              | Ar   | -2.070842619 | -5.999237938 | 5.713263141 |
|        |              | Ar   | -1.136072131 | 3.779638096  | 9.783212961 |
|        |              | Ar   | -0.327255412 | -6.35860473  | 8.879771204 |
|        |              | Ar   | -3.697860234 | -5.209995219 | 2.483593216 |
|        |              | Ar   | -6.37086284  | -0.301666835 | 5.505863419 |
|        |              | Ar   | -6.043338755 | -1.949646519 | 8.77101495  |
|        |              | Ar   | 1.766159225  | 6.093666443  | 9.493153995 |
|        |              | Ar   | -3.878001829 | -5.037039144 | 8.803582588 |
|        |              | Ar   | 1.708904515  | 2.753651922  | 7.560335237 |
|        |              | Ar   | -1.293920351 | -2.931362824 | 3.902211446 |
|        |              | Ar   | 0.629727189  | -3.234310888 | 7.251318055 |
|        |              | Ar   | -1.317397092 | -3.094182196 | 10.52933117 |
|        |              | Ar   | -0.324580726 | 3.264168965  | 4.566247961 |
|        |              | Ar   | 3.122092022  | 5.584906228  | 5.982091616 |
|        |              | Ar   | -2.795635926 | 5.784523624  | 4.048144454 |
|        |              | Ar   | 4.787586767  | -4.222306389 | 5.568090374 |
|        |              | Ar   | 5.691460838  | 2.887566696  | 5.813328213 |
|        |              | Ar   | -0.988619991 | 3.944757587  | 1.032058663 |
| 10     | 50           | Ar   | -5.122907111 | -3.834065955 | 5.58650021  |
|        |              | Ar   | 6.260083972  | 0.867892585  | 8.830965847 |
|        |              | Ar   | 2.440382458  | -2.397679911 | 10.48881281 |
|        |              | Ar   | 0.938121995  | 6.320134464  | 3.123134822 |
|        |              | Ar   | 3.398230937  | -5.37898917  | 2.291987915 |
|        |              | Ar   | -0.220160757 | -6.310090075 | 2.392939713 |
|        |              | Ar   | -0.011563654 | 0.094907946  | 9.280533162 |
|        |              | Ar   | -2.732973796 | -1.787478357 | 7.252088629 |
|        |              | Ar   | 3.202345944  | -0.592876    | 7.258757693 |
|        |              | Ar   | 6.226859492  | 1.233814015  | 2.532251486 |
|        |              | Ar   | 1.631636391  | -6.167015166 | 5.460099026 |
|        |              | Ar   | -5.409446269 | 3.286848895  | 4.876969808 |
|        |              | Ar   | 2.891357137  | 1.469321337  | 4.08632309  |
|        |              | Ar   | -3.806933828 | 5.151841212  | 7.632107402 |
|        |              | Ar   | 4.338992001  | 4.576764299  | 2.709979936 |
|        |              | Ar   | 5.814862285  | -2.558571674 | 2.370249236 |
|        |              | Ar   | 0.023309529  | -0.075599284 | 5.649032674 |
|        |              | Ar   | 4.793298934  | 4.181750557  | 9.103535429 |
|        |              | Ar   | -6.037220639 | 2.024183111  | 8.302219497 |
|        |              | Ar   | -5.866412683 | -2.304900715 | 2.425011547 |
|        |              | Ar   | -6.284740117 | 1.207909269  | 1.988201378 |
|        |              | Ar   | 3.241401745  | -5.490573527 | 8.651216489 |
|        |              | Ar   | 5.728525126  | -2.75757222  | 8.72988466  |
|        |              | Ar   | 3.379825118  | -0.305844968 | 0.741719442 |
|        |              | Ar   | -0.43773589  | 6.337704871  | 6.695586168 |
|        |              | Ar   | -3.499719589 | 0.253977947  | 10.3748777  |

|    |
|----|
| Ar |
|----|

| Length | Cluster size | Atom | x            | y            | z           |
|--------|--------------|------|--------------|--------------|-------------|
| 20     | 10           | Ar   | 0.976674356  | -1.486094371 | 7.275153928 |
|        |              | Ar   | -1.253562579 | -1.24057565  | 10.27556214 |
|        |              | Ar   | -0.986150399 | 1.475606602  | 12.73700588 |
|        |              | Ar   | 1.272306201  | 1.215293326  | 4.795139739 |
|        |              | Ar   | 1.407806855  | -1.070258369 | 12.81773615 |
|        |              | Ar   | -1.407805377 | 1.06907427   | 7.345815841 |
|        |              | Ar   | -1.32927307  | -1.150421629 | 15.28471665 |
|        |              | Ar   | -1.315913213 | -1.120982469 | 4.232154285 |
|        |              | Ar   | 1.328001218  | 1.150406262  | 9.802743701 |
|        |              | Ar   | 1.229863451  | 1.225832112  | 15.8300038  |

**Ar**

| Length | Cluster size | Atom | x            | y            | z           |
|--------|--------------|------|--------------|--------------|-------------|
|        |              | Ar   | 0.942496502  | -2.156990766 | 12.08714884 |
|        |              | Ar   | 2.329353538  | -0.246613236 | 5.212977496 |
|        |              | Ar   | -1.472384692 | 1.838158709  | 10.37892887 |
|        |              | Ar   | 2.341344031  | 0.037129655  | 14.69350204 |
|        |              | Ar   | -0.088198802 | 2.368994597  | 4.393870579 |
|        |              | Ar   | 1.132178796  | 2.068680703  | 7.817827599 |
|        |              | Ar   | 2.004455006  | 1.231243948  | 11.25970707 |
|        |              | Ar   | -2.268059672 | -0.639404619 | 12.97071511 |
|        |              | Ar   | -0.582084928 | -2.282815016 | 6.056785121 |
| 20     | 20           | Ar   | -0.382944297 | 2.320823338  | 13.84836154 |
|        |              | Ar   | -2.198691526 | 0.836398735  | 6.93715064  |
|        |              | Ar   | 0.648680531  | -2.245083034 | 2.600216289 |
|        |              | Ar   | 1.888711612  | -1.396595921 | 8.648475858 |
|        |              | Ar   | 1.911232645  | -1.232757509 | 18.13441743 |
|        |              | Ar   | -0.31433761  | -2.349777335 | 15.50843108 |
|        |              | Ar   | -1.629218002 | -1.706242251 | 9.525763706 |
|        |              | Ar   | 0.844020307  | 2.175960369  | 17.29747588 |
|        |              | Ar   | 2.028687046  | 1.046202127  | 1.767003703 |
|        |              | Ar   | -2.27809571  | 0.497746187  | 16.52704048 |
|        |              | Ar   | -2.309854666 | -0.292864999 | 3.397460889 |

Ar

| Length | Cluster size | Atom | x            | y            | z           |
|--------|--------------|------|--------------|--------------|-------------|
|        |              | Ar   | -2.343557481 | -2.497464536 | 13.32710351 |
|        |              | Ar   | 3.017817197  | -1.641204849 | 10.38055544 |
|        |              | Ar   | 2.532003996  | -2.335507227 | 17.08042092 |
|        |              | Ar   | -3.40695468  | -0.26861767  | 16.11446876 |
|        |              | Ar   | 1.213456274  | -3.20486736  | 13.72301705 |
|        |              | Ar   | 3.118885604  | 1.325778331  | 17.32585691 |
|        |              | Ar   | 2.148684512  | -2.667258398 | 6.920495998 |
|        |              | Ar   | -0.137751204 | -3.436781135 | 10.27140483 |
|        |              | Ar   | -3.259706477 | 1.057082976  | 12.62540084 |
|        |              | Ar   | 0.152286778  | -0.068514343 | 15.63706947 |
|        |              | Ar   | 3.422789968  | -0.327339727 | 13.87506853 |
|        |              | Ar   | 2.789012678  | 1.972528112  | 10.79959338 |
|        |              | Ar   | 3.340854026  | 0.765459562  | 7.344305542 |
|        |              | Ar   | -1.455583489 | -3.117992019 | 6.770172994 |
| 20     | 30           | Ar   | 1.935848794  | 2.816182098  | 4.569931904 |
|        |              | Ar   | -2.679028515 | 2.184388681  | 9.047081403 |
|        |              | Ar   | 3.368658027  | -0.660747235 | 3.863731823 |
|        |              | Ar   | 0.036036932  | -0.163495966 | 8.556043107 |
|        |              | Ar   | 1.842162471  | 2.903560811  | 14.25782569 |
|        |              | Ar   | -1.677926419 | 3.010964096  | 15.30961067 |
|        |              | Ar   | 0.749064032  | -3.356901932 | 3.552936661 |
|        |              | Ar   | 0.729629514  | 3.348521634  | 8.055903696 |
|        |              | Ar   | -3.442212958 | -0.123154062 | 6.404602649 |
|        |              | Ar   | -2.720836333 | -2.022188694 | 3.325480625 |
|        |              | Ar   | -0.025420019 | -0.167723388 | 5.005957459 |
|        |              | Ar   | -3.118029981 | -1.400630139 | 9.872335848 |
|        |              | Ar   | -0.539060911 | 3.417974149  | 11.62324991 |
|        |              | Ar   | -1.107082702 | -3.251839319 | 16.80206241 |
|        |              | Ar   | 0.113970223  | -0.116646224 | 12.08655804 |
|        |              | Ar   | -1.758898782 | 2.961187092  | 5.367976303 |

|    |
|----|
| Ar |
|----|

| Length | Cluster size | Atom | x            | y            | z           |
|--------|--------------|------|--------------|--------------|-------------|
|        |              | Ar   | -4.317571002 | 0.68903302   | 3.12726885  |
|        |              | Ar   | -0.681617611 | -1.102160575 | 16.85768239 |
|        |              | Ar   | 3.968328423  | 1.873175941  | 5.703440068 |
|        |              | Ar   | -4.317934763 | -0.878574662 | 9.2595213   |
|        |              | Ar   | 2.215716674  | 3.76713361   | 8.426125303 |
|        |              | Ar   | 0.752351222  | 4.323389082  | 14.66019769 |
|        |              | Ar   | 1.732691578  | -4.041859211 | 17.33051518 |
|        |              | Ar   | 1.434174965  | -4.14915868  | 7.470344445 |
|        |              | Ar   | -1.148426717 | -0.056750848 | 11.08261447 |
|        |              | Ar   | 1.211694607  | 4.223861096  | 4.840337925 |
|        |              | Ar   | -3.954010053 | -1.915969411 | 5.709424709 |
|        |              | Ar   | 0.363617595  | -4.376105427 | 11.03665772 |
|        |              | Ar   | -2.373865398 | 3.728688428  | 3.967411342 |
|        |              | Ar   | 4.185145771  | -1.300456359 | 16.46254343 |
|        |              | Ar   | 0.958355638  | 0.56826523   | 13.98583532 |
|        |              | Ar   | 3.074188981  | 3.134810306  | 12.00194686 |
|        |              | Ar   | -1.8813337   | 3.96924638   | 17.31506313 |
|        |              | Ar   | 4.410502683  | -0.216831689 | 12.86325701 |
|        |              | Ar   | 2.418729571  | -3.665040808 | 3.898352689 |
| 20     | 40           | Ar   | -3.766246599 | -2.343825815 | 15.31880505 |
|        |              | Ar   | -0.316867994 | 4.370046928  | 11.09507788 |
|        |              | Ar   | -4.218288584 | 1.173147269  | 16.43726603 |
|        |              | Ar   | 3.781944784  | 2.299717282  | 15.61612077 |
|        |              | Ar   | -3.06130546  | -3.188611355 | 11.85388668 |
|        |              | Ar   | -2.149519908 | -3.795653446 | 8.351633467 |
|        |              | Ar   | 1.057036844  | -0.416380705 | 8.222646198 |
|        |              | Ar   | -4.069516027 | 1.733018928  | 6.669235216 |
|        |              | Ar   | 2.732159493  | -3.405420988 | 13.74895383 |
|        |              | Ar   | 4.338456352  | 0.873344513  | 9.322578036 |
|        |              | Ar   | -1.183861955 | -4.222234595 | 4.774089266 |
|        |              | Ar   | -4.410655996 | 0.225973801  | 12.80586733 |
|        |              | Ar   | 3.524500798  | -2.63410391  | 10.17104656 |
|        |              | Ar   | 4.086283999  | -1.698937246 | 6.555386284 |
|        |              | Ar   | -0.765401957 | -4.317355826 | 14.61037162 |
|        |              | Ar   | 1.78242461   | 4.011661528  | 18.22064033 |
|        |              | Ar   | -0.890589693 | 0.523454914  | 5.244666138 |
|        |              | Ar   | -3.998252851 | -1.732854027 | 18.88791156 |
|        |              | Ar   | -1.373383098 | 4.145123355  | 7.52506689  |
|        |              | Ar   | -3.516521234 | 2.68994812   | 10.18874584 |
|        |              | Ar   | -2.742852692 | 3.389179352  | 13.74738654 |

## Ar

| Length | Cluster size | Atom | x            | y            | z           |
|--------|--------------|------|--------------|--------------|-------------|
|        |              | Ar   | 4.945725267  | 1.091335693  | 14.52088499 |
|        |              | Ar   | -4.021206996 | -3.037056084 | 10.71909476 |
|        |              | Ar   | 4.236946727  | -2.665144065 | 7.703281186 |
|        |              | Ar   | -1.078823757 | 4.86333032   | 8.182504389 |
|        |              | Ar   | 2.731012721  | 4.149159789  | 8.124027901 |
|        |              | Ar   | -0.647821588 | -4.938833931 | 4.363465001 |
|        |              | Ar   | 0.909744326  | 4.871228025  | 4.964875629 |
|        |              | Ar   | -1.113392887 | 1.364236409  | 14.88302511 |
|        |              | Ar   | -2.4999189   | -4.255060679 | 7.533919156 |
|        |              | Ar   | 1.050332181  | 4.952031197  | 11.22741595 |
|        |              | Ar   | 0.355164649  | -1.799496978 | 15.83443677 |
|        |              | Ar   | -1.20687041  | -1.464689607 | 12.39494025 |
|        |              | Ar   | -3.18953945  | 3.930231555  | 10.99581386 |
|        |              | Ar   | 1.104454813  | -4.861204025 | 14.03930085 |
|        |              | Ar   | 1.759888898  | -0.750742196 | 9.445058838 |
|        |              | Ar   | 4.827609057  | -1.032115759 | 17.54186923 |
|        |              | Ar   | -4.852037222 | 0.956794494  | 4.394025438 |
|        |              | Ar   | -2.710024009 | 4.139359341  | 4.832305924 |
|        |              | Ar   | -3.063323855 | 3.888735356  | 17.13218455 |
|        |              | Ar   | 4.096719054  | 2.728367821  | 11.24631804 |
|        |              | Ar   | 4.869191383  | -0.722503786 | 4.60544011  |
|        |              | Ar   | 1.388151043  | 0.823210602  | 3.583423054 |
|        |              | Ar   | -4.422867795 | 2.363574373  | 13.97428131 |
|        |              | Ar   | -1.25593146  | 4.8413986    | 14.00136969 |
| 20     | 50           | Ar   | -0.414927434 | 1.790744014  | 10.86603433 |
|        |              | Ar   | 4.161331408  | -2.672562367 | 14.26626375 |
|        |              | Ar   | -0.845526039 | -4.929101619 | 17.32822622 |
|        |              | Ar   | 0.531389515  | 4.91329694   | 17.30776996 |
|        |              | Ar   | 0.206648864  | 1.725104295  | 7.009133939 |
|        |              | Ar   | 2.974259177  | -3.978471135 | 4.419340382 |
|        |              | Ar   | 0.408223504  | -1.798006457 | 6.028157023 |
|        |              | Ar   | -2.548142607 | -4.305063083 | 14.09825561 |
|        |              | Ar   | 1.232138627  | -4.84426804  | 7.755140884 |
|        |              | Ar   | 4.062446889  | 2.905210404  | 4.945316363 |
|        |              | Ar   | 2.91199282   | -3.987091151 | 10.96099498 |
|        |              | Ar   | 4.845942817  | 1.011026209  | 7.989679042 |
|        |              | Ar   | 2.684277954  | 4.139791804  | 14.37036941 |
|        |              | Ar   | -4.921895554 | 0.642172614  | 17.21012875 |
|        |              | Ar   | -4.895259308 | 0.541920525  | 10.76543662 |
|        |              | Ar   | 1.921063749  | 0.144920294  | 13.07258751 |
|        |              | Ar   | 2.08441072   | 1.445059245  | 16.8252398  |
|        |              | Ar   | 4.938944109  | -0.868766182 | 11.17486873 |
|        |              | Ar   | -4.197922304 | 2.514684009  | 7.75351611  |
|        |              | Ar   | -3.930178151 | -3.000193097 | 4.291489024 |
|        |              | Ar   | -0.786062489 | -4.885683492 | 10.82006335 |
|        |              | Ar   | -4.748623564 | -1.320638855 | 13.9741007  |
|        |              | Ar   | 2.776286355  | -4.137604996 | 17.35815606 |
|        |              | Ar   | -1.777957747 | -0.833006834 | 8.838437913 |
|        |              | Ar   | -3.982671546 | -2.955538782 | 17.24265706 |
|        |              | Ar   | -4.903780546 | -1.217014522 | 7.36373279  |

**Ar**

| Length | Cluster size | Atom | x            | y            | z           |
|--------|--------------|------|--------------|--------------|-------------|
| 30     | 10           | Ar   | -0.021597744 | -0.006328997 | 28.08229947 |
|        |              | Ar   | 0.005585433  | -0.021798322 | 3.995706141 |
|        |              | Ar   | -0.010801999 | -0.005976269 | 10.87930803 |
|        |              | Ar   | 0.01215045   | -0.002186006 | 14.31911935 |
|        |              | Ar   | 0.065611241  | 0.026274708  | 31.56658766 |
|        |              | Ar   | 0.007584522  | 0.009900096  | 24.63892844 |
|        |              | Ar   | -0.008081401 | 0.009331687  | 17.75886282 |
|        |              | Ar   | 0.004637588  | 0.011579514  | 7.439068683 |
|        |              | Ar   | -0.01089607  | 0.069865254  | 0.511416587 |
|        |              | Ar   | 0.000380767  | -0.012330631 | 21.19867955 |

Ar

| Length | Cluster size | Atom | x            | y            | z           |
|--------|--------------|------|--------------|--------------|-------------|
| 30     | 20           | Ar   | -0.010039275 | -1.980555526 | 7.778311699 |
|        |              | Ar   | 1.80379503   | 0.819013057  | 18.31951892 |
|        |              | Ar   | 0.858535174  | 1.793882958  | 21.79932095 |
|        |              | Ar   | 0.66478068   | -1.867388465 | 20.63622702 |
|        |              | Ar   | -1.278971415 | -1.502275609 | 4.289589299 |
|        |              | Ar   | -1.671053659 | -1.070455005 | 13.65061441 |
|        |              | Ar   | -1.908792301 | -0.508387656 | 22.97889117 |
|        |              | Ar   | -1.83162644  | 0.744840014  | 19.44579689 |
|        |              | Ar   | 1.513424736  | 1.288827834  | 8.977546375 |
|        |              | Ar   | -1.969281778 | 0.159670811  | 10.1300572  |
|        |              | Ar   | -0.605953666 | -1.893373318 | 17.12512592 |
|        |              | Ar   | 1.922697565  | -0.457893423 | 14.79835657 |
|        |              | Ar   | -0.339504264 | 1.945531996  | 25.36314525 |
|        |              | Ar   | 1.178284884  | -1.591127576 | 11.3098423  |
|        |              | Ar   | 1.959815313  | 0.192356563  | 5.404801479 |
|        |              | Ar   | -1.136682981 | -1.609356126 | 26.4839082  |
|        |              | Ar   | -1.395014202 | 1.401267367  | 6.640561398 |
|        |              | Ar   | -0.929717561 | 1.750599909  | 15.9605445  |
|        |              | Ar   | 0.332567798  | 1.958403347  | 12.44890313 |
|        |              | Ar   | 1.705615283  | -0.998784269 | 24.12300525 |



## Ar

| Length | Cluster size | Atom | x            | y            | z           |
|--------|--------------|------|--------------|--------------|-------------|
|        |              | Ar   | -2.32379958  | 0.064199963  | 4.240882941 |
|        |              | Ar   | 1.714548966  | 1.605005913  | 9.546631331 |
|        |              | Ar   | -2.089611144 | -1.082826841 | 7.842584831 |
|        |              | Ar   | 2.071663913  | -1.1145657   | 21.76474323 |
|        |              | Ar   | -2.324396427 | 0.308106047  | 13.94083632 |
|        |              | Ar   | 2.159787396  | -0.945203851 | 12.18300723 |
|        |              | Ar   | -0.814916972 | 2.188322242  | 6.915448344 |
|        |              | Ar   | 2.303683054  | 0.45597765   | 6.073852381 |
|        |              | Ar   | 2.131304634  | -0.872148175 | 2.57543228  |
|        |              | Ar   | -0.624952199 | 2.257672326  | 16.54765416 |
|        |              | Ar   | -0.369948875 | 2.297712744  | 26.23909224 |
|        |              | Ar   | 0.647753361  | 2.249628672  | 13.05318946 |
|        |              | Ar   | 2.329287758  | 0.301214149  | 15.66632539 |
|        |              | Ar   | -1.211019346 | -2.01439269  | 11.32755295 |
| 30     | 30           | Ar   | -2.199889565 | -0.753605117 | 27.07466778 |
|        |              | Ar   | 1.165304009  | -1.99061402  | 27.90106529 |
|        |              | Ar   | 2.359811777  | 0.158028372  | 25.20817326 |
|        |              | Ar   | -1.365912735 | -1.918965521 | 20.93363387 |
|        |              | Ar   | -1.712961955 | 1.594467909  | 20.0442724  |
|        |              | Ar   | -0.003987637 | -2.357287625 | 14.81205189 |
|        |              | Ar   | 0.786498769  | 2.208428414  | 22.63646271 |
|        |              | Ar   | -2.152574333 | -0.939098242 | 17.43698136 |
|        |              | Ar   | -2.287166493 | 0.506782791  | 23.57434463 |
|        |              | Ar   | 1.212530956  | -2.020028028 | 18.28944727 |
|        |              | Ar   | 1.35695399   | -1.921445302 | 8.714429668 |
|        |              | Ar   | -1.813502145 | 1.481699347  | 10.44897153 |
|        |              | Ar   | 1.837749636  | 1.460087814  | 19.15462633 |
|        |              | Ar   | 0.155214895  | -2.365001891 | 5.254297394 |
|        |              | Ar   | 0.480781124  | 2.279295044  | 3.433984379 |
|        |              | Ar   | -0.173816338 | -2.343405074 | 24.4209649  |

|    |
|----|
| Ar |
|----|

| Length | Cluster size | Atom | x            | y            | z           |
|--------|--------------|------|--------------|--------------|-------------|
|        |              | Ar   | -1.475788928 | 2.886946575  | 9.896288015 |
|        |              | Ar   | -2.866353191 | 1.489028393  | 6.568077295 |
|        |              | Ar   | -3.214160915 | -0.502428008 | 22.64169933 |
|        |              | Ar   | 2.865574746  | -1.455825264 | 3.588655687 |
|        |              | Ar   | -2.294928968 | -2.273893749 | 25.92748641 |
|        |              | Ar   | 0.505783996  | 3.203073801  | 25.89801671 |
|        |              | Ar   | -2.307683183 | -2.298868178 | 19.51729309 |
|        |              | Ar   | 1.467142369  | -2.920458107 | 19.49859719 |
|        |              | Ar   | -1.465676578 | 2.883719564  | 16.27381484 |
|        |              | Ar   | 0.509561457  | 3.226068756  | 13.04242781 |
|        |              | Ar   | 3.187990975  | 0.496322544  | 25.90911801 |
|        |              | Ar   | 3.195278434  | 0.528862854  | 6.70780856  |
|        |              | Ar   | 2.893195219  | -1.480005349 | 22.64707716 |
|        |              | Ar   | 1.448932944  | -2.910748191 | 6.695372534 |
|        |              | Ar   | -0.516912467 | -3.20042193  | 22.62847557 |
|        |              | Ar   | 2.883027859  | -1.486065084 | 9.920775466 |
|        |              | Ar   | 0.521494225  | 3.220635251  | 19.50988025 |
|        |              | Ar   | 0.515836201  | 3.207454121  | 6.640470877 |
|        |              | Ar   | 2.301574236  | 2.288167064  | 16.25813923 |
| 30     | 40           | Ar   | 3.212827518  | 0.492616857  | 19.51000727 |
|        |              | Ar   | 1.46700129   | -2.921735859 | 13.03111465 |
|        |              | Ar   | -2.879467725 | 1.490655635  | 25.87029396 |
|        |              | Ar   | 0.000282894  | -0.000638844 | 24.21495299 |
|        |              | Ar   | -2.900515035 | 1.480840387  | 13.01005322 |
|        |              | Ar   | -2.901936183 | 1.484523168  | 19.49781613 |
|        |              | Ar   | -3.212174285 | -0.490249668 | 16.26927204 |
|        |              | Ar   | -3.225136699 | -0.494333055 | 9.874685177 |
|        |              | Ar   | -0.00088122  | -0.000878062 | 18.0469586  |
|        |              | Ar   | -0.009379668 | 0.00405964   | 8.313831566 |
|        |              | Ar   | -2.316537813 | -2.287705948 | 13.0330775  |
|        |              | Ar   | 1.456085069  | -2.899391681 | 25.8851457  |
|        |              | Ar   | -1.458833131 | 2.890908106  | 22.62877072 |
|        |              | Ar   | -2.290534641 | -2.278548421 | 6.621672232 |
|        |              | Ar   | -0.001214418 | 0.000213993  | 14.48785662 |
|        |              | Ar   | 3.211760515  | 0.502272551  | 13.02602806 |
|        |              | Ar   | -0.541716554 | -3.192713273 | 9.905546804 |
|        |              | Ar   | 2.315101065  | 2.284932564  | 22.63118878 |
|        |              | Ar   | 2.88508672   | -1.473880227 | 16.2764232  |
|        |              | Ar   | 2.283904457  | 2.307210937  | 9.905515289 |
|        |              | Ar   | -0.524291293 | -3.190847277 | 16.25987158 |

## Ar

| Length | Cluster size | Atom | x            | y            | z           |
|--------|--------------|------|--------------|--------------|-------------|
|        |              | Ar   | 1.753935804  | -2.960615675 | 13.88301778 |
|        |              | Ar   | -3.413530089 | 0.478204464  | 12.53796236 |
|        |              | Ar   | 3.158338871  | 1.314680245  | 8.312113341 |
|        |              | Ar   | 2.796382884  | -2.001915348 | 17.22934032 |
|        |              | Ar   | -0.144220125 | -0.064781802 | 21.06341759 |
|        |              | Ar   | 3.267677772  | -1.053081248 | 11.19098026 |
|        |              | Ar   | -2.556554162 | 2.297308197  | 25.66663263 |
|        |              | Ar   | -2.656266336 | -2.194747793 | 19.45007796 |
|        |              | Ar   | -3.306209384 | -0.93678524  | 15.98198629 |
|        |              | Ar   | -0.644618389 | -3.393421401 | 16.56846177 |
|        |              | Ar   | 3.07704346   | -1.350200881 | 1.557302818 |
|        |              | Ar   | 0.04290477   | 0.148644301  | 10.17738399 |
|        |              | Ar   | -0.146829605 | 0.048888211  | 17.4355067  |
|        |              | Ar   | 2.072586681  | 2.745105497  | 21.32059828 |
|        |              | Ar   | -2.348449579 | 2.516864941  | 15.58256446 |
|        |              | Ar   | 1.605509959  | 3.056783945  | 5.112160767 |
|        |              | Ar   | -3.406509216 | -0.598313289 | 6.322200204 |
|        |              | Ar   | -3.180666595 | -1.331024187 | 26.06424936 |
|        |              | Ar   | 2.965172264  | -1.647745695 | 26.77498715 |
|        |              | Ar   | -3.152863063 | 1.359536999  | 19.12204705 |
|        |              | Ar   | -0.95858466  | -3.309746174 | 7.081579614 |
|        |              | Ar   | -3.426058191 | 0.044715953  | 22.63778774 |
|        |              | Ar   | -0.053953959 | -0.127580033 | 24.70210804 |
|        |              | Ar   | 3.373845518  | -0.719991899 | 20.61147346 |
| 30     | 50           | Ar   | -0.067732522 | 0.136773486  | 13.80497164 |
|        |              | Ar   | -1.557043513 | -3.053052272 | 22.91219065 |
|        |              | Ar   | -2.962246171 | 1.790713523  | 9.044954596 |
|        |              | Ar   | 2.06801479   | -2.748594448 | 23.3349702  |
|        |              | Ar   | 1.429464825  | -3.097942671 | 4.347541353 |
|        |              | Ar   | -1.133453153 | 3.238401353  | 12.04650203 |
|        |              | Ar   | 3.009330946  | 1.695486248  | 17.94848189 |
|        |              | Ar   | 2.378642252  | 2.487349229  | 11.72799416 |
|        |              | Ar   | 1.17707284   | 3.228235903  | 15.16494877 |
|        |              | Ar   | 3.436009766  | 0.359630879  | 14.55368326 |
|        |              | Ar   | -0.221070682 | 3.441120172  | 18.58007128 |
|        |              | Ar   | 3.369852215  | 0.69958246   | 24.00282416 |
|        |              | Ar   | -2.903466082 | -1.846936918 | 9.756646946 |
|        |              | Ar   | 0.224696057  | 3.420056306  | 8.542633852 |
|        |              | Ar   | 3.437928173  | -0.086885333 | 4.960832095 |
|        |              | Ar   | -0.182691785 | -3.41701938  | 26.32571523 |
|        |              | Ar   | 0.781528515  | -3.344647518 | 19.9453558  |
|        |              | Ar   | -2.06367126  | 2.747045274  | 5.456329127 |
|        |              | Ar   | -1.56083393  | 3.09207337   | 22.05061823 |
|        |              | Ar   | -1.9469388   | -2.855182212 | 13.1558796  |
|        |              | Ar   | 2.564065271  | -2.294098125 | 7.810840858 |
|        |              | Ar   | 0.431477459  | -3.427206702 | 10.49869361 |
|        |              | Ar   | 0.122706747  | 0.072380482  | 6.53497504  |
|        |              | Ar   | 2.734588047  | 1.967464432  | 27.48984107 |
|        |              | Ar   | 0.849151167  | 3.360276185  | 24.73044871 |
|        |              | Ar   | -2.128120255 | -2.609895793 | 3.563757763 |

**Ar**

| Length | Cluster size | Atom | x            | y            | z           |
|--------|--------------|------|--------------|--------------|-------------|
| 50     | 10           | Ar   | 0.008739463  | -0.00563009  | 12.31448446 |
|        |              | Ar   | -0.010369461 | 0.000679828  | 38.87776624 |
|        |              | Ar   | -0.000928023 | 0.010361612  | 35.0825103  |
|        |              | Ar   | -0.004006186 | -0.009681078 | 8.513026523 |
|        |              | Ar   | 0.006895553  | 0.007794539  | 16.10975501 |
|        |              | Ar   | -0.008888436 | -0.005373419 | 23.69889732 |
|        |              | Ar   | -0.006653497 | 0.007984016  | 19.90439016 |
|        |              | Ar   | 0.003957473  | -0.009612035 | 27.49337307 |
|        |              | Ar   | -0.002528937 | -0.010162275 | 42.67923222 |
|        |              | Ar   | 0.01010475   | 0.002468024  | 31.28787047 |

**Ar**

| Length | Cluster size | Atom        | x            | y            | z           |
|--------|--------------|-------------|--------------|--------------|-------------|
| 50     | 20           | Ar          | 0.081362692  | 1.348882832  | 21.9237517  |
|        |              | Ar          | -0.002645922 | -1.35305122  | 19.73433835 |
|        |              | Ar          | 0.326379565  | -1.306940005 | 10.97670758 |
|        |              | Ar          | -0.30834454  | -1.317529327 | 28.49270912 |
|        |              | Ar          | -0.60800482  | -1.209442009 | 37.23912519 |
|        |              | Ar          | -0.637268079 | 1.01510476   | 3.778178926 |
|        |              | Ar          | 0.852540699  | 0.967875326  | 44.01941757 |
|        |              | Ar          | 0.245617416  | 1.33034779   | 26.30666749 |
|        |              | Ar          | -0.232389764 | 1.331082197  | 13.17604684 |
|        |              | Ar          | 0.542785135  | 1.240227016  | 35.05712623 |
|        |              | Ar          | 0.68041773   | 1.162977414  | 39.4324813  |
|        |              | Ar          | 0.137993612  | -1.345689692 | 15.36567509 |
|        |              | Ar          | -0.92850636  | -0.760812079 | 46.61991846 |
|        |              | Ar          | 0.520546725  | -1.177264678 | 6.385042724 |
|        |              | Ar          | 0.379265628  | 1.29774772   | 30.68047759 |
|        |              | Ar          | -0.170433922 | -1.340570627 | 24.11689012 |
|        |              | Ar          | -0.771162612 | -1.084177662 | 41.67080427 |
|        |              | Ar          | -0.464659781 | -1.269656348 | 32.87081434 |
| Ar     | -0.413795896 | 1.264574761 | 8.73865279   |              |             |
| Ar     | -0.06324132  | 1.352350259 | 17.55022632  |              |             |

|    |
|----|
| Ar |
|----|

| Length | Cluster size | Atom | x            | y            | z           |
|--------|--------------|------|--------------|--------------|-------------|
|        |              | Ar   | -1.244673557 | -1.387280513 | 18.82453615 |
|        |              | Ar   | -1.761898507 | -0.612374043 | 28.57566654 |
|        |              | Ar   | -1.694484616 | 0.779664339  | 11.34762494 |
|        |              | Ar   | 1.393341841  | 1.242088968  | 37.34875371 |
|        |              | Ar   | -1.09224969  | -1.507240356 | 32.29190899 |
|        |              | Ar   | 0.05558351   | -1.862614625 | 36.02382017 |
|        |              | Ar   | -1.370846756 | 1.257682077  | 34.79751139 |
|        |              | Ar   | 1.865563888  | -0.0121485   | 20.05630677 |
|        |              | Ar   | 0.607287259  | -1.756773414 | 12.58207605 |
|        |              | Ar   | 1.052662451  | -1.512023317 | 39.86529726 |
|        |              | Ar   | -1.800817689 | 0.477863122  | 24.91982129 |
|        |              | Ar   | 1.688298688  | 0.791663331  | 10.03160668 |
|        |              | Ar   | 0.149577265  | 1.799230219  | 41.18683094 |
|        |              | Ar   | -0.202903474 | 1.854319821  | 17.59076148 |
| 50     | 30           | Ar   | 1.626075343  | -0.909519998 | 29.80606916 |
|        |              | Ar   | -1.858314902 | 0.164043113  | 38.48364274 |
|        |              | Ar   | -1.817818002 | -0.402671812 | 15.09289079 |
|        |              | Ar   | 1.855235645  | 0.222086243  | 33.52112408 |
|        |              | Ar   | -0.408054356 | 1.82219969   | 31.03476226 |
|        |              | Ar   | 0.702760715  | 1.726245144  | 27.35182035 |
|        |              | Ar   | -1.223310073 | 1.405304447  | 21.27725073 |
|        |              | Ar   | -0.575579282 | -1.776391816 | 8.901225294 |
|        |              | Ar   | 0.926634063  | 1.622549917  | 13.84891177 |
|        |              | Ar   | 1.713327611  | -0.561009929 | 6.201920778 |
|        |              | Ar   | -0.242535311 | -1.8478089   | 22.49423646 |
|        |              | Ar   | 1.520143368  | -1.080841271 | 16.34750062 |
|        |              | Ar   | 1.56988454   | -0.792982567 | 43.57120514 |
|        |              | Ar   | 0.826166243  | -1.669873507 | 26.13844066 |
|        |              | Ar   | 1.549478843  | 1.034053636  | 23.71092577 |
|        |              | Ar   | -0.987527603 | 1.552816273  | 7.517185571 |

## Ar

| Length | Cluster size | Atom | x            | y            | z           |
|--------|--------------|------|--------------|--------------|-------------|
|        |              | Ar   | -1.782115153 | 0.9120812    | 12.28511216 |
|        |              | Ar   | -1.311558375 | -1.542804818 | 32.22087028 |
|        |              | Ar   | -1.875337236 | 0.810492361  | 21.25834682 |
|        |              | Ar   | -0.426259851 | 1.933982666  | 6.643255487 |
|        |              | Ar   | -0.809973127 | -1.865302371 | 23.40891459 |
|        |              | Ar   | -1.072038837 | 1.672981685  | 15.86929852 |
|        |              | Ar   | 1.887927716  | -0.78522914  | 33.71616419 |
|        |              | Ar   | -1.480570618 | 1.337540683  | 25.09757754 |
|        |              | Ar   | 0.86320587   | 1.849007675  | 31.5198094  |
|        |              | Ar   | 1.758403826  | 0.915937497  | 13.5865322  |
|        |              | Ar   | 1.83263402   | -0.831717674 | 16.82091517 |
|        |              | Ar   | -1.347041846 | 1.460928445  | 34.43195277 |
|        |              | Ar   | 1.780544561  | -0.906802813 | 42.65710826 |
|        |              | Ar   | 1.914476445  | -0.804110436 | 25.49447149 |
|        |              | Ar   | -1.094348888 | -1.658539574 | 5.411018408 |
|        |              | Ar   | 1.005666814  | 1.771884224  | 27.77694035 |
|        |              | Ar   | -0.951673644 | -1.745760845 | 45.00834848 |
|        |              | Ar   | 0.995022889  | 1.732242175  | 10.04634704 |
|        |              | Ar   | 0.760619838  | -1.834107866 | 11.25206242 |
| 50     | 40           | Ar   | 1.475232956  | -1.334288688 | 29.7604409  |
|        |              | Ar   | -1.591159427 | -1.201289359 | 18.19650909 |
|        |              | Ar   | -1.598387838 | 1.168521068  | 47.22048349 |
|        |              | Ar   | 1.389108953  | 1.465159695  | 22.72771469 |
|        |              | Ar   | -0.790248129 | -1.870578649 | 35.90914499 |
|        |              | Ar   | 0.780515755  | 1.866536089  | 19.03514445 |
|        |              | Ar   | -1.933161347 | 0.761934573  | 29.54863636 |
|        |              | Ar   | 1.958431811  | 0.243710425  | 4.239581918 |
|        |              | Ar   | 1.326956959  | -1.485158597 | 20.47817996 |
|        |              | Ar   | 1.892704922  | 0.577872448  | 46.06119982 |
|        |              | Ar   | -0.725619221 | 1.836817585  | 43.66759413 |
|        |              | Ar   | 1.070353532  | -1.66749225  | 39.05988098 |
|        |              | Ar   | 0.881111995  | 1.810632117  | 40.36492958 |
|        |              | Ar   | 1.5635877    | 1.238742262  | 36.74534644 |
|        |              | Ar   | 1.704007262  | -1.043827029 | 7.732002642 |
|        |              | Ar   | -1.515451703 | 1.270384632  | 3.16633128  |
|        |              | Ar   | -1.1151727   | -1.723435918 | 27.1372845  |
|        |              | Ar   | -1.739638052 | -0.960645683 | 41.41306254 |
|        |              | Ar   | -0.852335253 | -1.817843705 | 14.56689423 |
|        |              | Ar   | -1.844986151 | 0.787968583  | 38.1497395  |
|        |              | Ar   | -1.870985075 | -0.63038213  | 8.917972648 |

## Ar

| Length | Cluster size | Atom | x            | y            | z           |
|--------|--------------|------|--------------|--------------|-------------|
|        |              | Ar   | -0.990288185 | -2.131337417 | 23.31828236 |
|        |              | Ar   | -2.022623739 | -1.189020302 | 17.17562637 |
|        |              | Ar   | -2.126422174 | -0.967867701 | 7.485657932 |
|        |              | Ar   | 0.268027599  | -2.330510501 | 19.80167905 |
|        |              | Ar   | 1.627673115  | 1.692970257  | 15.4165725  |
|        |              | Ar   | 2.30631963   | 0.393572272  | 9.294460663 |
|        |              | Ar   | 1.564170201  | 1.70678706   | 39.30901405 |
|        |              | Ar   | -1.65223049  | 1.628286743  | 37.566699   |
|        |              | Ar   | 0.532201198  | -2.276971922 | 29.3948445  |
|        |              | Ar   | 1.413526211  | 1.756428877  | 35.31720116 |
|        |              | Ar   | 1.554066103  | 1.673120329  | 46.84983191 |
|        |              | Ar   | 1.277270366  | -1.972532218 | 6.630183405 |
|        |              | Ar   | 2.24018303   | -0.679143805 | 22.43601743 |
|        |              | Ar   | -1.669150097 | 1.578169952  | 41.29806502 |
|        |              | Ar   | -2.019999583 | 1.138054503  | 33.85624945 |
|        |              | Ar   | 1.744606353  | -1.50654753  | 41.22354524 |
|        |              | Ar   | -0.723841041 | -2.238079172 | 32.74353759 |
|        |              | Ar   | -1.636048889 | -1.692083168 | 36.08957351 |
|        |              | Ar   | -1.490990902 | -1.705331365 | 46.9266641  |
|        |              | Ar   | 2.185801645  | -0.840506074 | 12.77997223 |
|        |              | Ar   | 0.376739868  | 2.31944424   | 21.5625807  |
|        |              | Ar   | 0.528251998  | 2.294252244  | 11.91301587 |
|        |              | Ar   | -1.892991547 | 1.381718829  | 14.53236578 |
|        |              | Ar   | 2.266172903  | 0.593847035  | 18.92871573 |
| 50     | 50           | Ar   | 2.320316809  | -0.390202283 | 32.32053034 |
|        |              | Ar   | 1.554533891  | 1.701023476  | 43.10015228 |
|        |              | Ar   | -2.343881724 | -0.102141506 | 30.30991453 |
|        |              | Ar   | -1.524891612 | -1.703374591 | 39.61956191 |
|        |              | Ar   | -0.896408369 | 2.166826926  | 18.04367841 |
|        |              | Ar   | -2.333830695 | 0.217767314  | 11.02534856 |
|        |              | Ar   | 1.772161197  | 1.549744559  | 5.82653428  |
|        |              | Ar   | -0.721165778 | 2.24616896   | 8.409075957 |
|        |              | Ar   | 0.074877073  | -2.354482676 | 10.13781622 |
|        |              | Ar   | -1.966662304 | 1.268065678  | 24.20909273 |
|        |              | Ar   | 1.533671559  | 1.79339665   | 25.08005339 |
|        |              | Ar   | 2.12575402   | -0.866601267 | 3.103481084 |
|        |              | Ar   | -1.550982217 | -1.682093756 | 43.2327739  |
|        |              | Ar   | 1.726978265  | -1.535174934 | 44.98045578 |
|        |              | Ar   | 1.778063332  | -1.441571744 | 37.38317522 |
|        |              | Ar   | 1.447946979  | -1.843237929 | 16.28725847 |
|        |              | Ar   | -1.292919706 | -1.932611507 | 3.970405063 |
|        |              | Ar   | -2.3407537   | 0.053012931  | 20.69369583 |
|        |              | Ar   | 0.220731221  | 2.340778819  | 31.27165991 |
|        |              | Ar   | -1.119008816 | -2.071261241 | 13.66082176 |
|        |              | Ar   | -1.695615031 | 1.607419813  | 4.795313575 |
|        |              | Ar   | -1.682092283 | 1.571872546  | 45.02943898 |
|        |              | Ar   | 2.236864632  | 0.779950375  | 28.63019473 |
|        |              | Ar   | 1.583588077  | -1.723843223 | 25.93110399 |
|        |              | Ar   | -1.016206504 | 2.111483686  | 27.71398449 |
|        |              | Ar   | -1.941641616 | -1.322874006 | 26.82807537 |

## References

- (1) Owais, C.; Aswin, G.; Swathi, R. S. Encapsulation of He Clusters into Carbon Nanotubes: A Modeling Strategy Based on Continuum Approximation and Particle Swarm Optimization. *J. Indian Chem. Soc.* **2019**, *96*, 1019–1028.
- (2) Warr, O.; Ballentine, C. J.; Mu, J.; Masters, A. Optimizing Noble Gas-Water Interactions via Monte Carlo Simulations. *J. Phys. Chem. B* **2015**, *119*, 14486–14495.
- (3) Kennedy, J.; Eberhart, R. Particle Swarm Optimization. *Proc. IEEE Int. Conf. Neural Netw.* **1995**, *4*, 1942–1948.
- (4) Eberhart, R.; Shi, Y. Particle Swarm Optimization: Developments, Applications and Resources. Proceedings of the 2001 Congress on Evolutionary Computation (IEEE Cat. No.01TH8546). 2001; pp 81–86 vol. 1.
